# Supplementary material for: Design, Synthesis and Structure-Activity Relationship Studies of Meridianin Derivatives as Novel JAK/STAT3 Signaling Inhibitors
Source: MDPI journal article supplement (doi:10.3390/ijms23042199), 2022-02-16
Supplement: s1 [file s1]

## Supplementary Data for

This word file includes Figure S1, Copies of  $^1\text{H}$ ,  $^{13}\text{C}$  NMR and HRMS spectra of the target products.

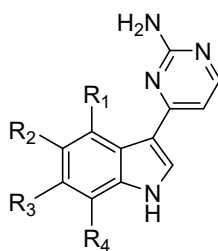

Meridianin A:  $\text{R}_1=\text{OH}$ ,  $\text{R}_2=\text{R}_3=\text{R}_4=\text{H}$   
Meridianin B:  $\text{R}_1=\text{OH}$ ,  $\text{R}_2=\text{R}_4=\text{H}$ ,  $\text{R}_3=\text{Br}$   
Meridianin C:  $\text{R}_1=\text{R}_3=\text{R}_4=\text{H}$ ,  $\text{R}_2=\text{Br}$   
Meridianin D:  $\text{R}_1=\text{R}_2=\text{R}_4$ ,  $\text{R}_3=\text{Br}$   
Meridianin E:  $\text{R}_1=\text{OH}$ ,  $\text{R}_2=\text{R}_3=\text{H}$ ,  $\text{R}_4=\text{Br}$   
Meridianin F:  $\text{R}_1=\text{R}_4=\text{H}$ ,  $\text{R}_2=\text{R}_3=\text{Br}$   
Meridianin G:  $\text{R}_1=\text{R}_2=\text{R}_3=\text{R}_4=\text{H}$

Figure. S1. Structures of meridianins A-G

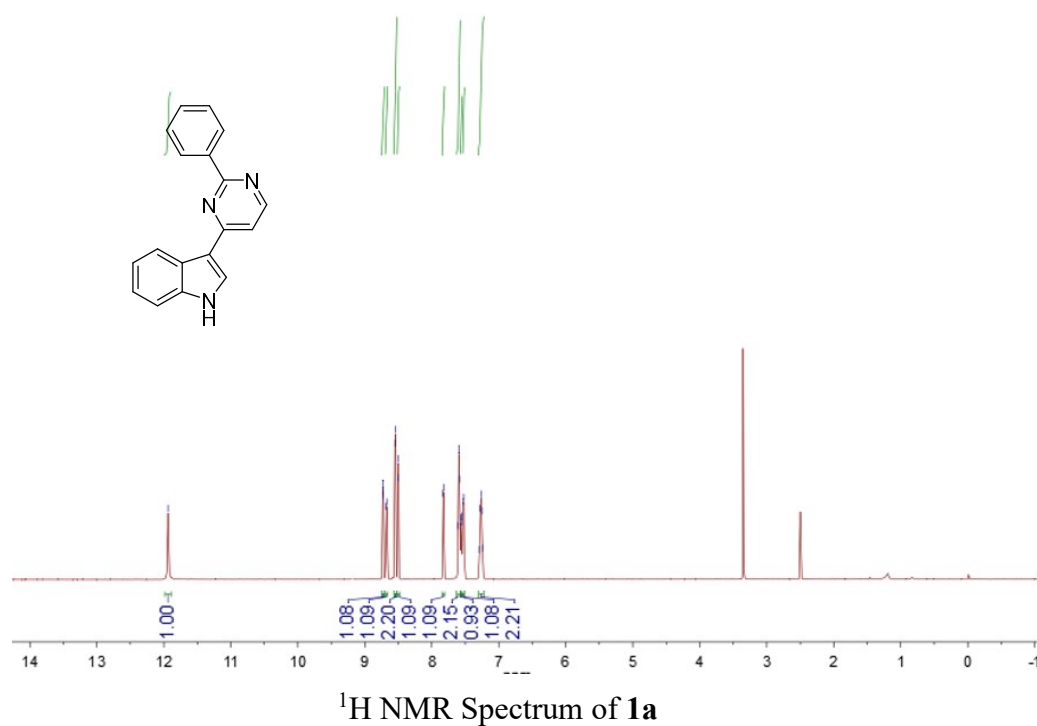

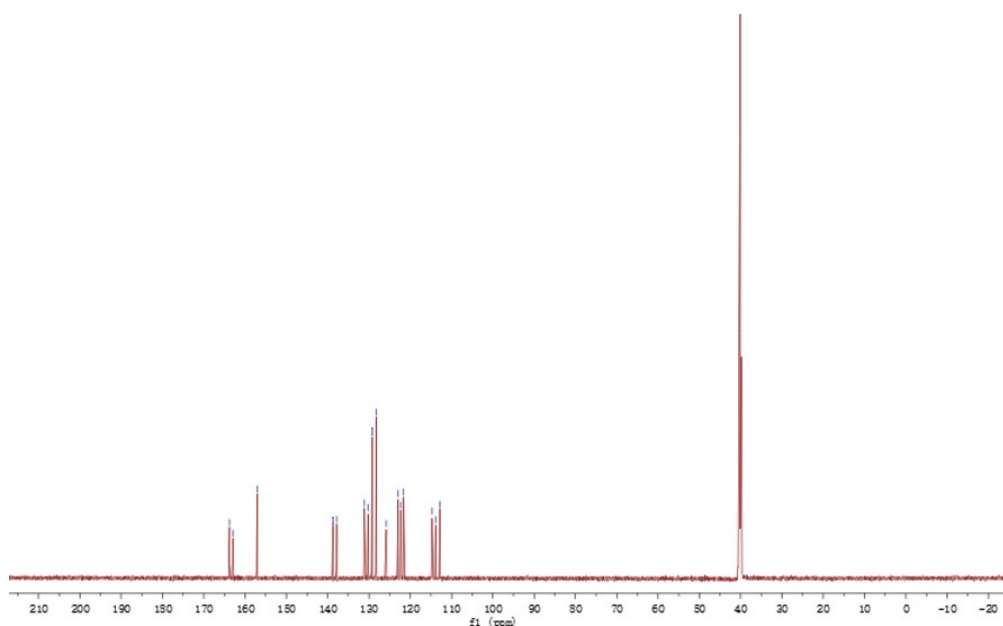

$^{13}\text{C}$  NMR Spectrum of **1a**

20210906-1a 210831093738 #55 RT: 0.44 AV: 1 NL: 5.58E7  
T: FTMS + p ESI Full ms [100.00-1500.00]

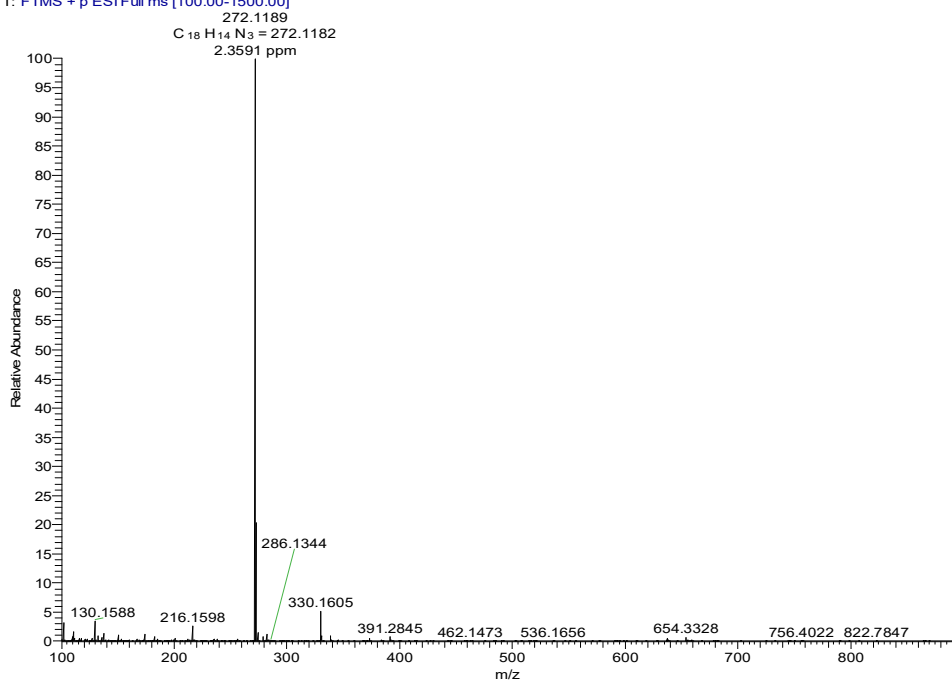

HRMS spectrum of **1a**

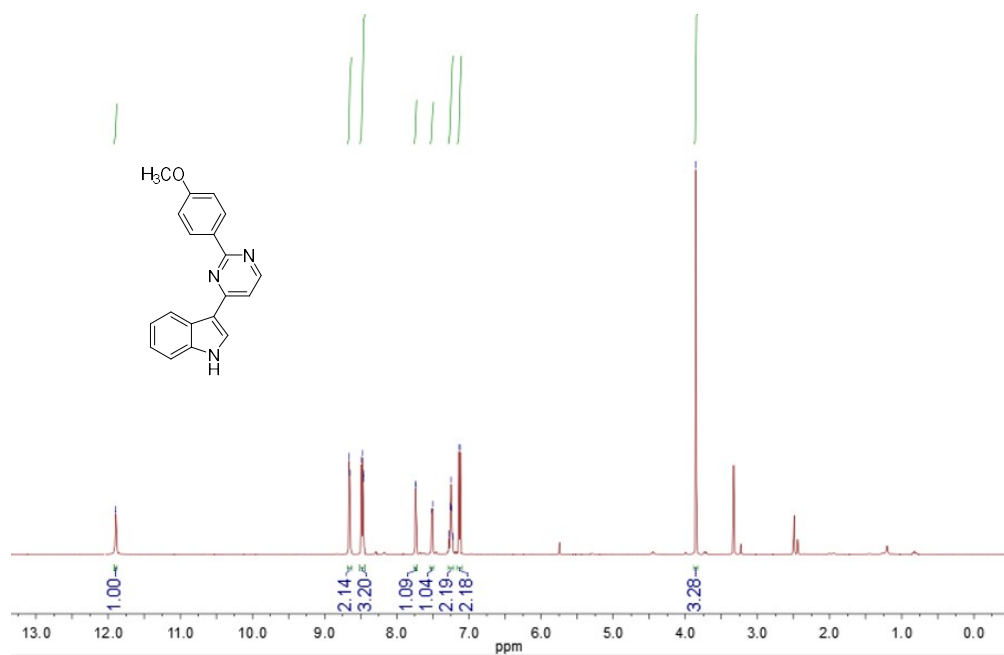

<sup>1</sup>H NMR Spectrum of **1b**

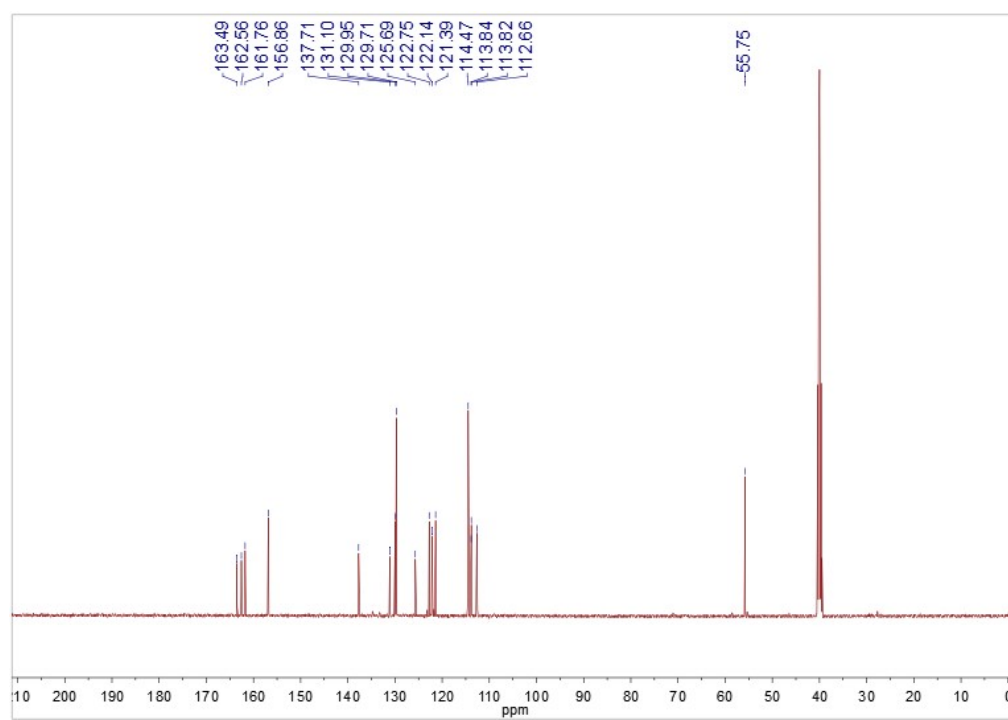

<sup>13</sup>C NMR Spectrum of **1b**

20210707-1B 210705141924 #28 RT: 0.23 AV: 1 NL: 5.12E6  
T: FTMS + c ESI Full ms [150.00-2000.00]

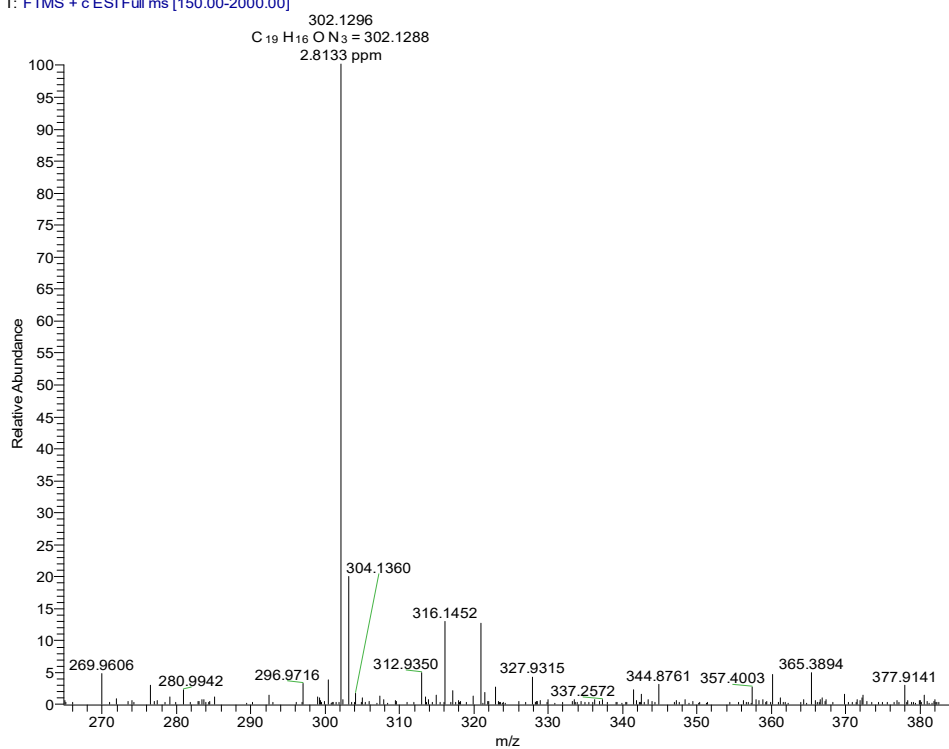

HRMS spectrum of **1b**

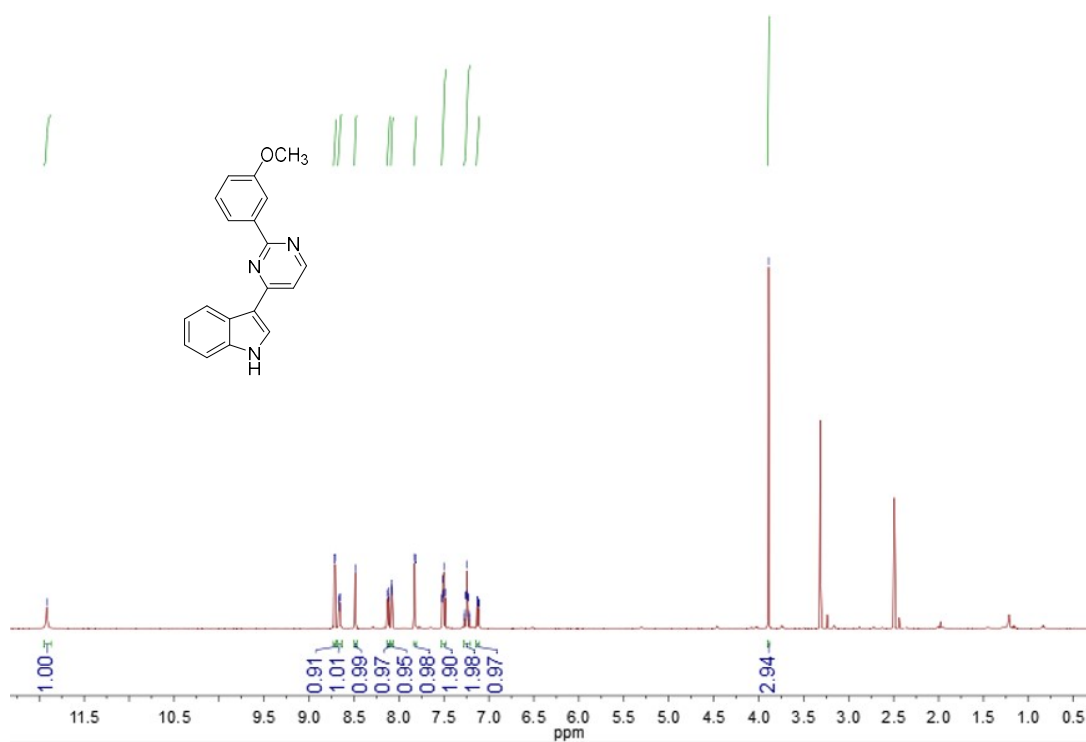

<sup>1</sup>H NMR Spectrum of **1c**

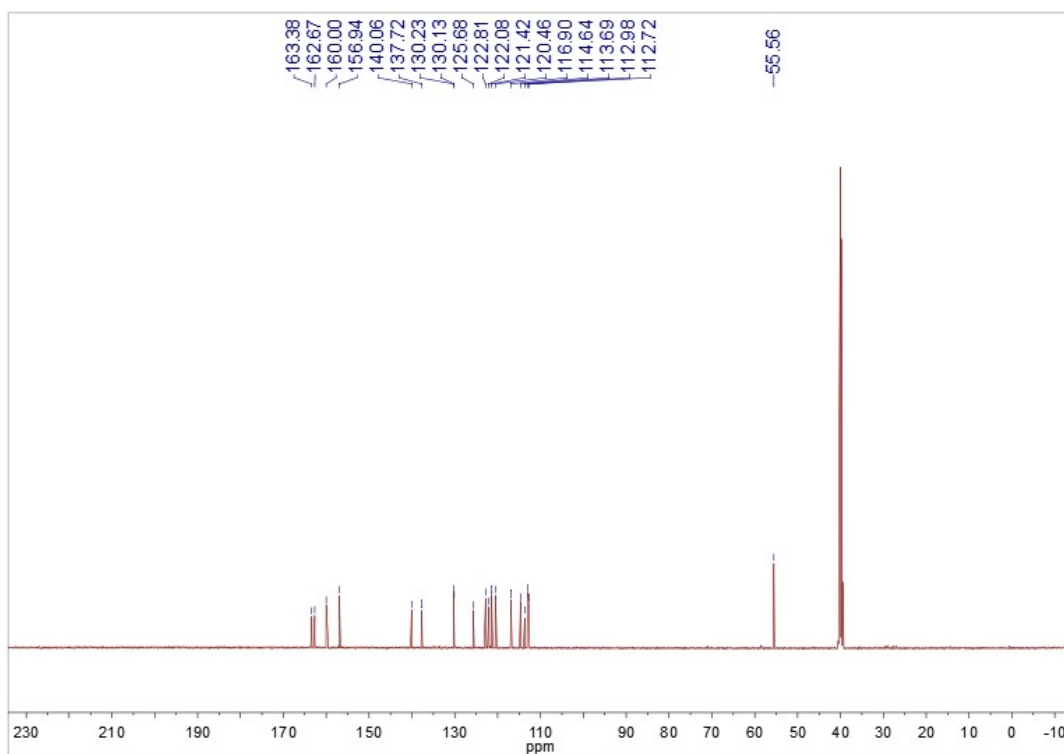

$^{13}\text{C}$  NMR Spectrum of **1c**

20210707-1C\_210705141924 #26 RT: 0.21 AV: 1 NL: 3.19E7

T: FTMS + c ESI Full ms [150.00-2000.00]

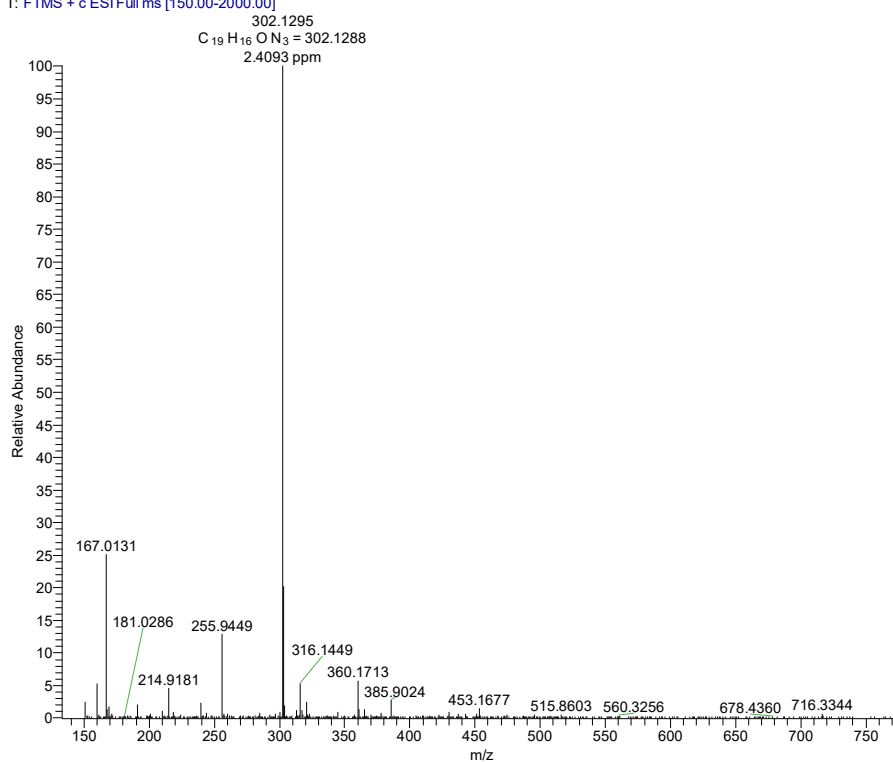

HRMS spectrum of **1c**

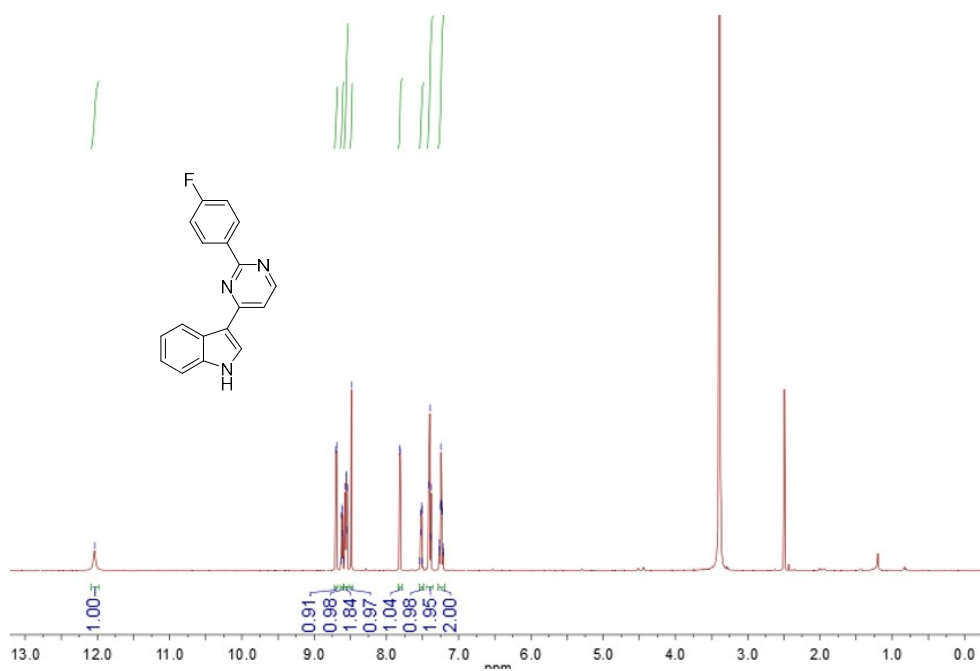

<sup>1</sup>H NMR Spectrum of 1d

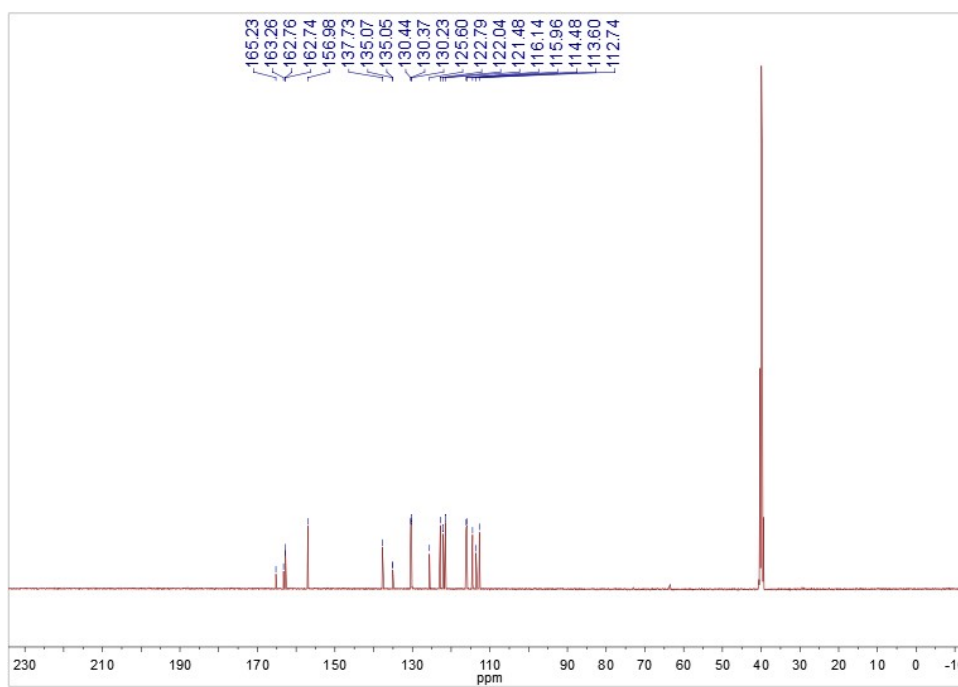

<sup>13</sup>C NMR Spectrum of 1d

20210707-1D 210705141924 #41 RT: 0.34 AV: 1 NL: 5.53E6  
T: FTMS + c ESI Full ms [150.00-2000.00]

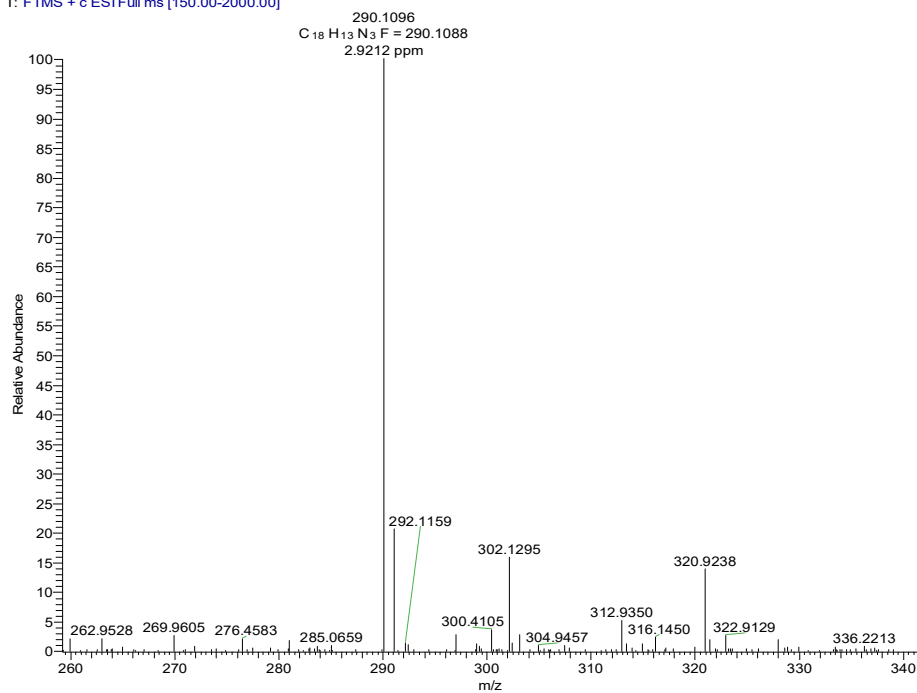

HRMS spectrum of **1d**

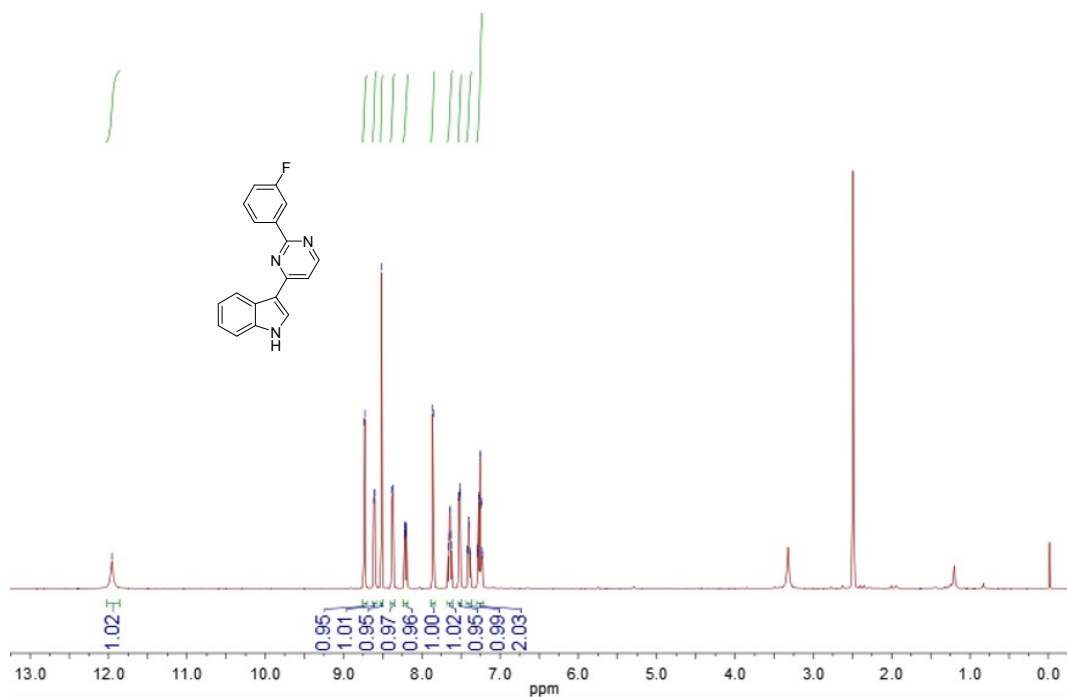

<sup>1</sup>H NMR Spectrum of **1e**

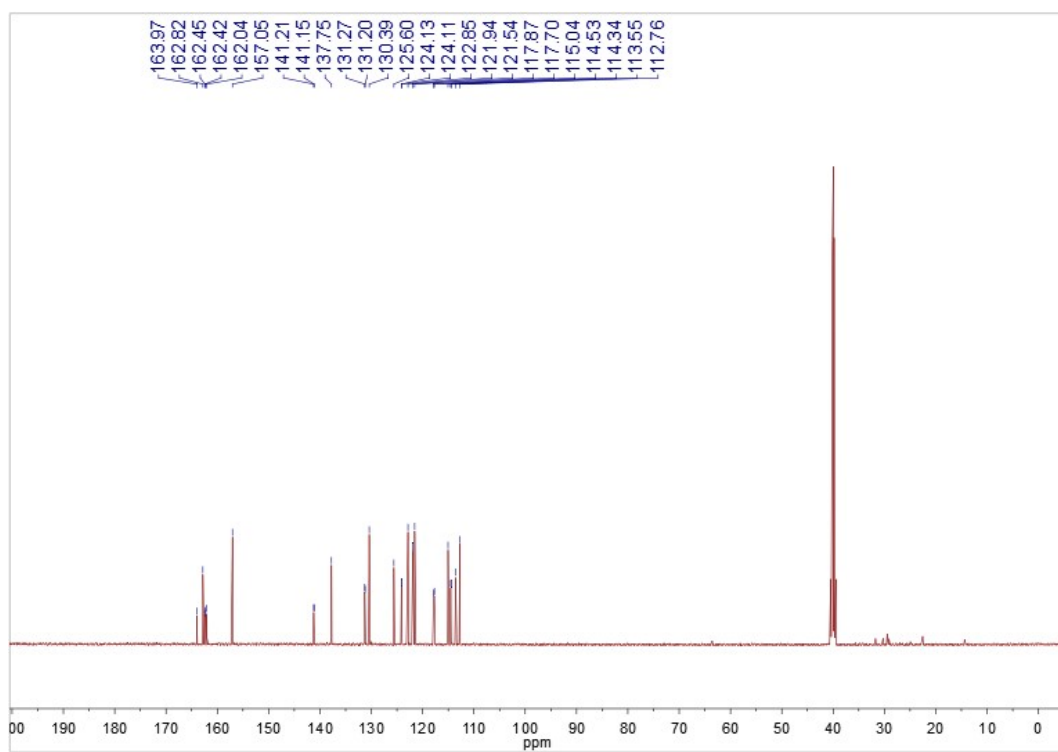

$^{13}\text{C}$  NMR Spectrum of **1e**

20210707-1E\_210705141924 #39 RT: 0.31 AV: 1 NL: 5.00E7  
T: FTMS + c ESI Full ms [150.00-2000.00]

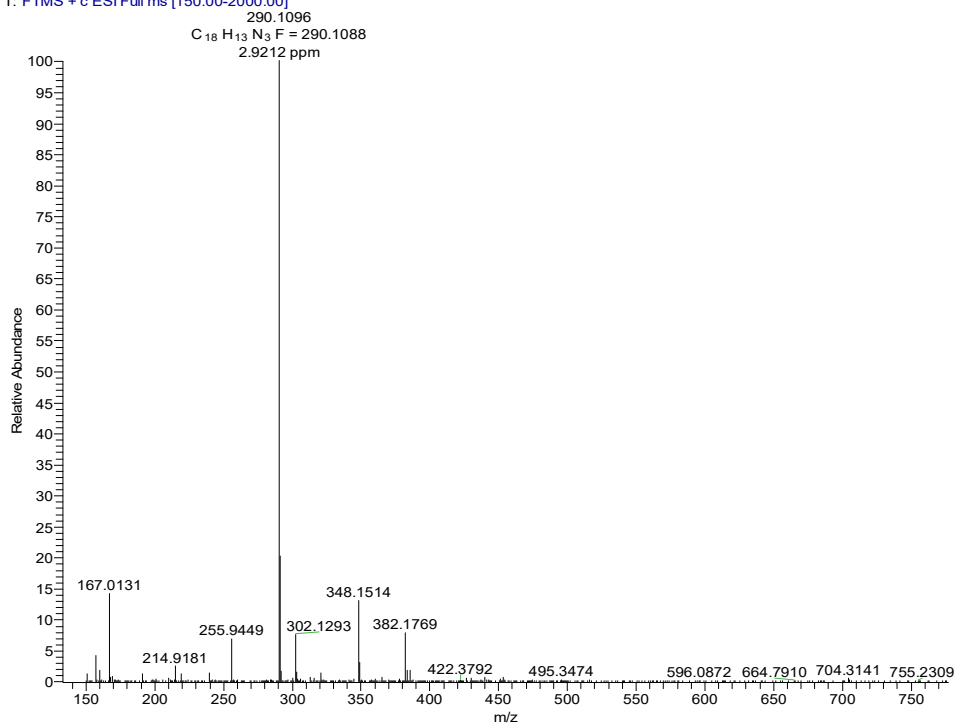

HRMS spectrum of **1e**



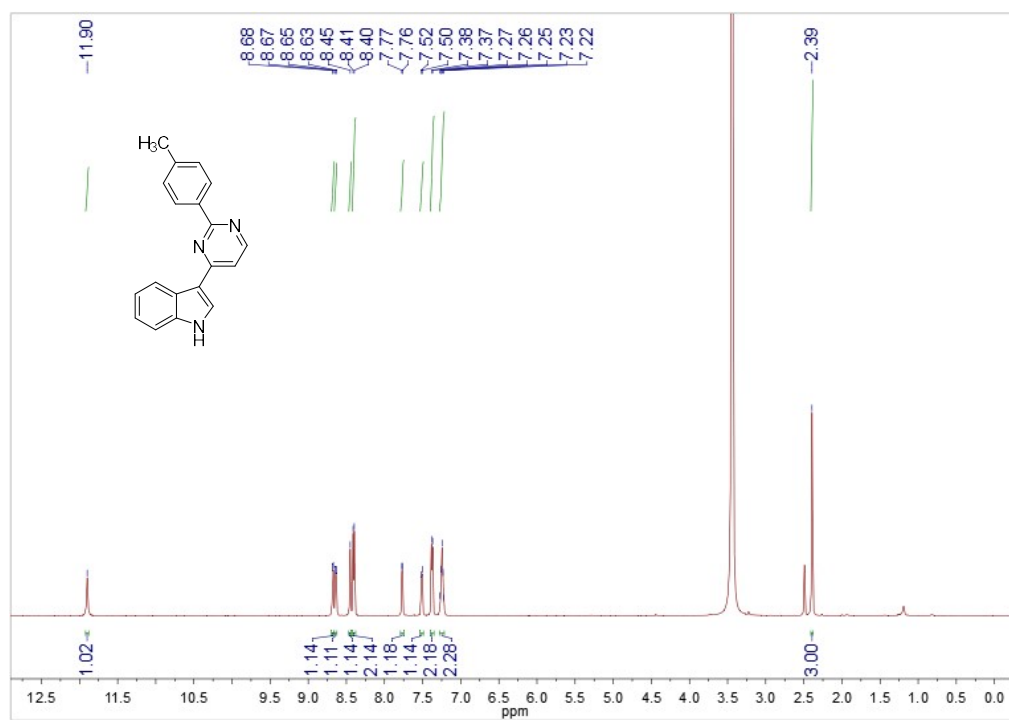

<sup>1</sup>H NMR Spectrum of **1f**

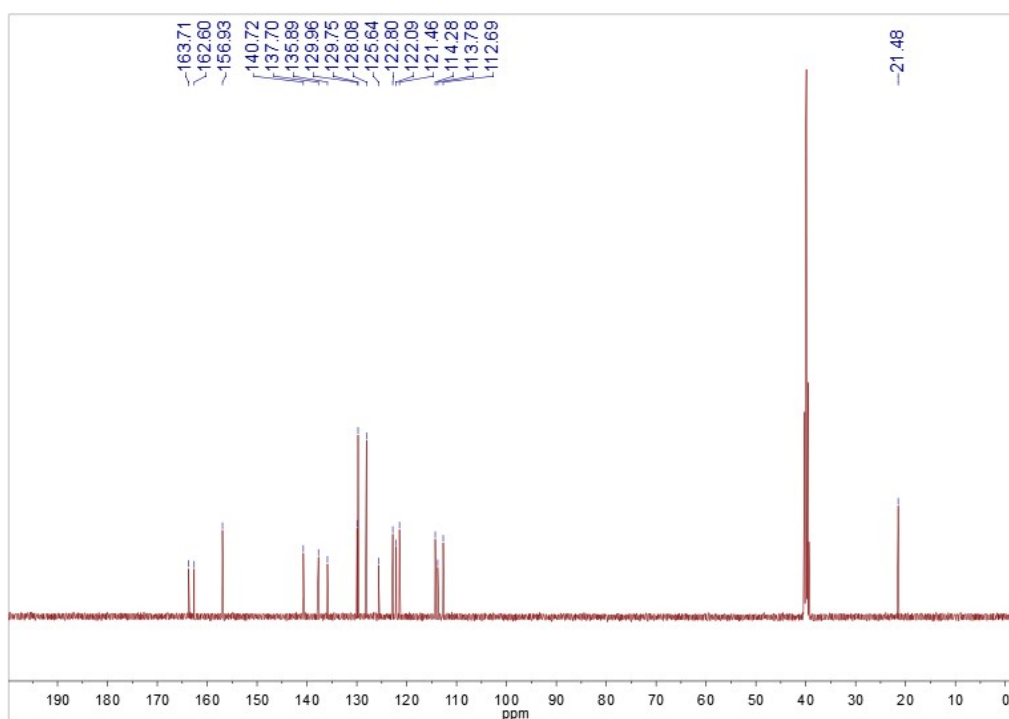

<sup>13</sup>C NMR Spectrum of **1f**

20210707-1F 210707085046 #90 RT: 0.72 AV: 1 NL: 1.02E8  
T: FTMS + c ESI Full ms [150.00-2000.00]

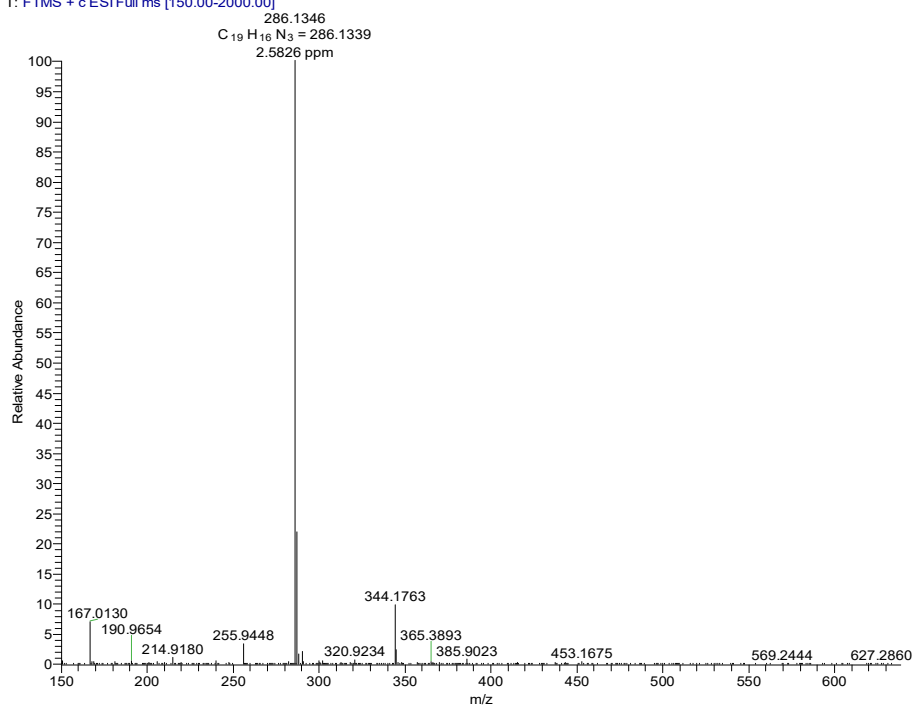

HRMS spectrum of **1f**

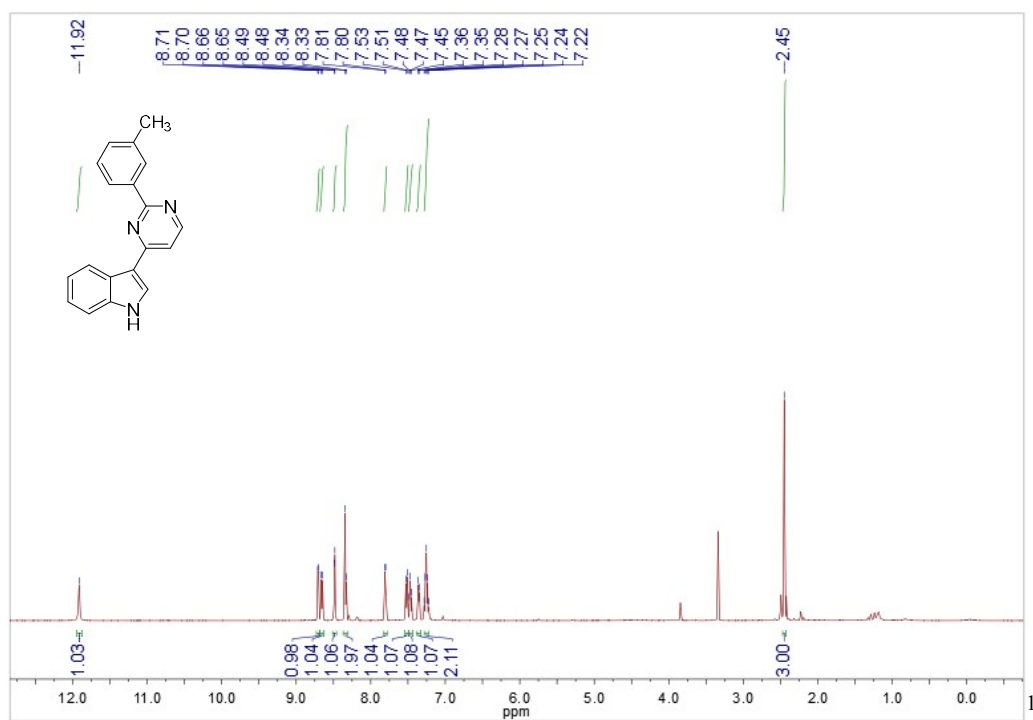

<sup>1</sup>H NMR Spectrum of **1g**

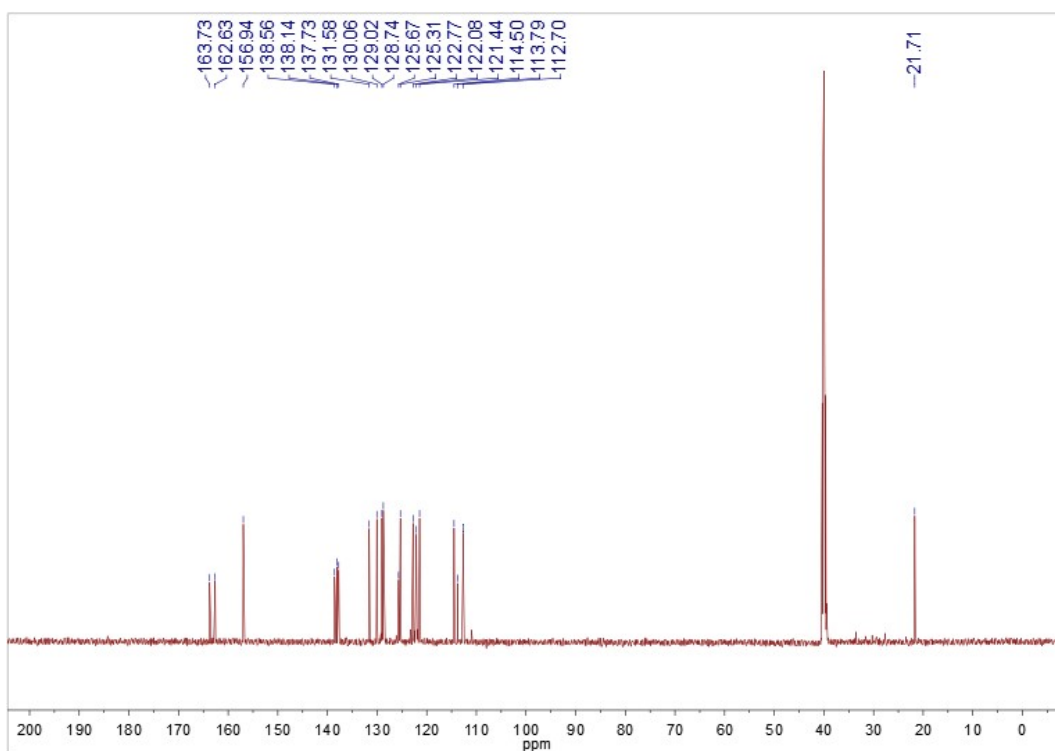

$^{13}\text{C}$  NMR Spectrum of **1g**

20210707-1G\_210705141924 #18 RT: 0.14 AV: 1 NL: 4.92E7  
T: FTMS + c ESI Full ms [150.00-2000.00]

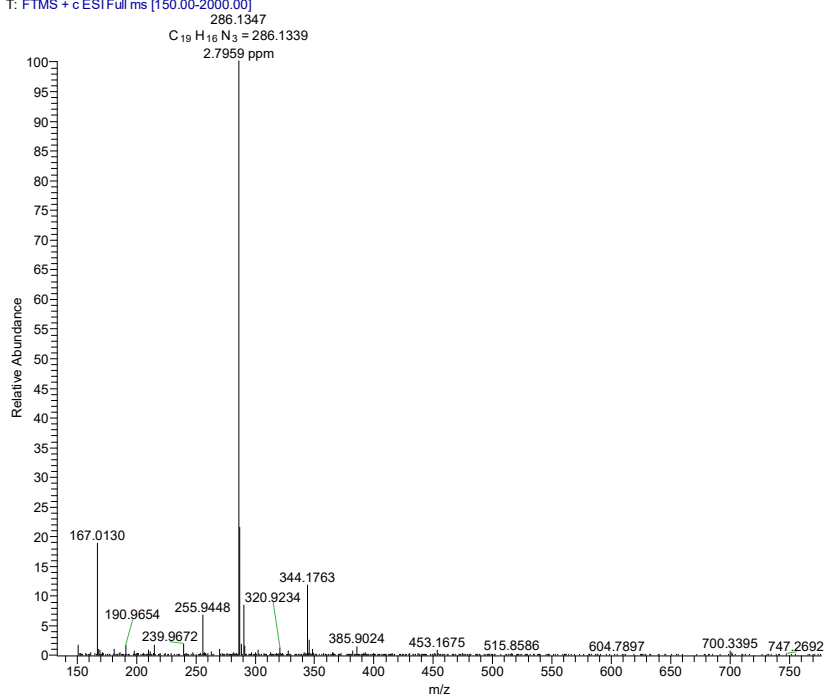

HRMS spectrum of **1g**

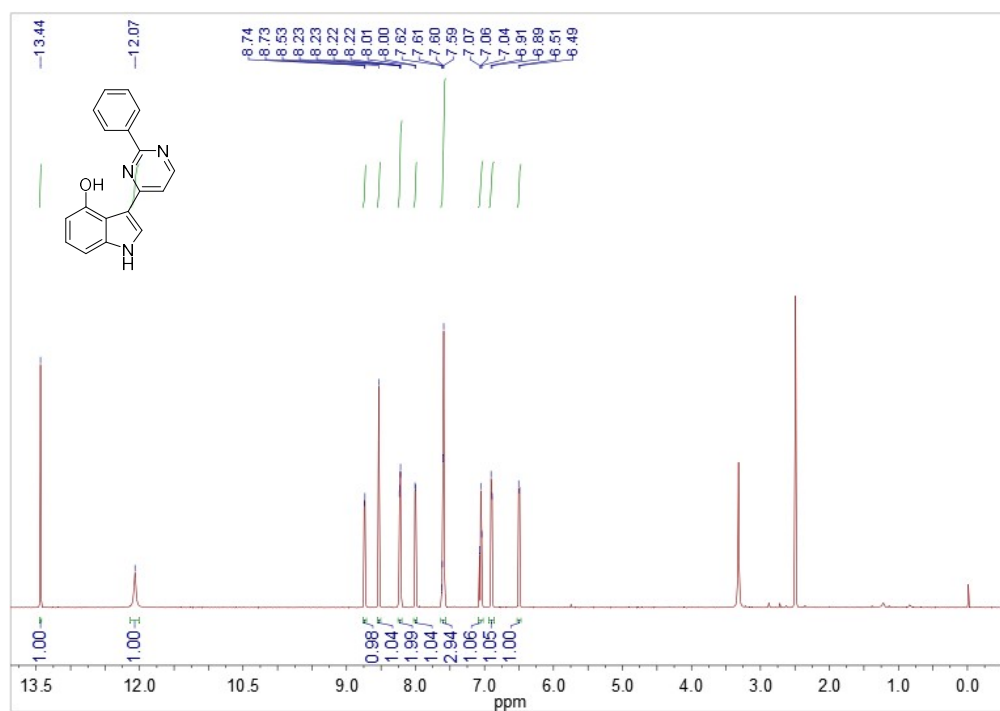

<sup>1</sup>H NMR Spectrum of **2a**

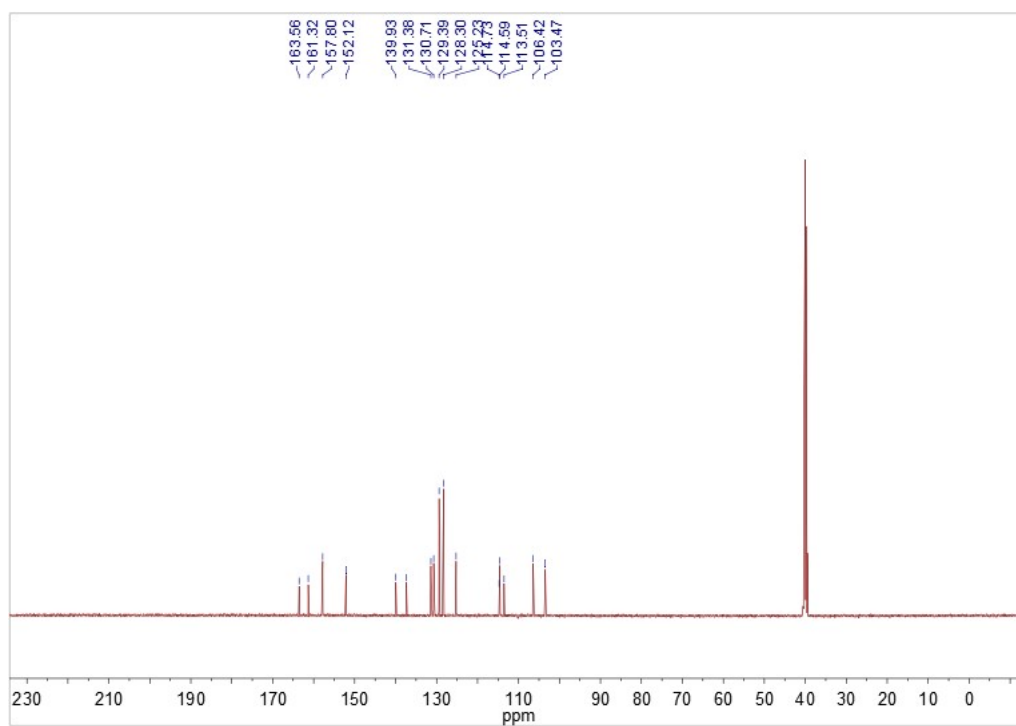

<sup>13</sup>C NMR Spectrum of **2a**

20180305-DXY-5\_180306100350 #83 RT: 0.64 AV: 1 NL: 1.46E8  
T: FTMS + p ESI Full ms [100.00-1000.00]

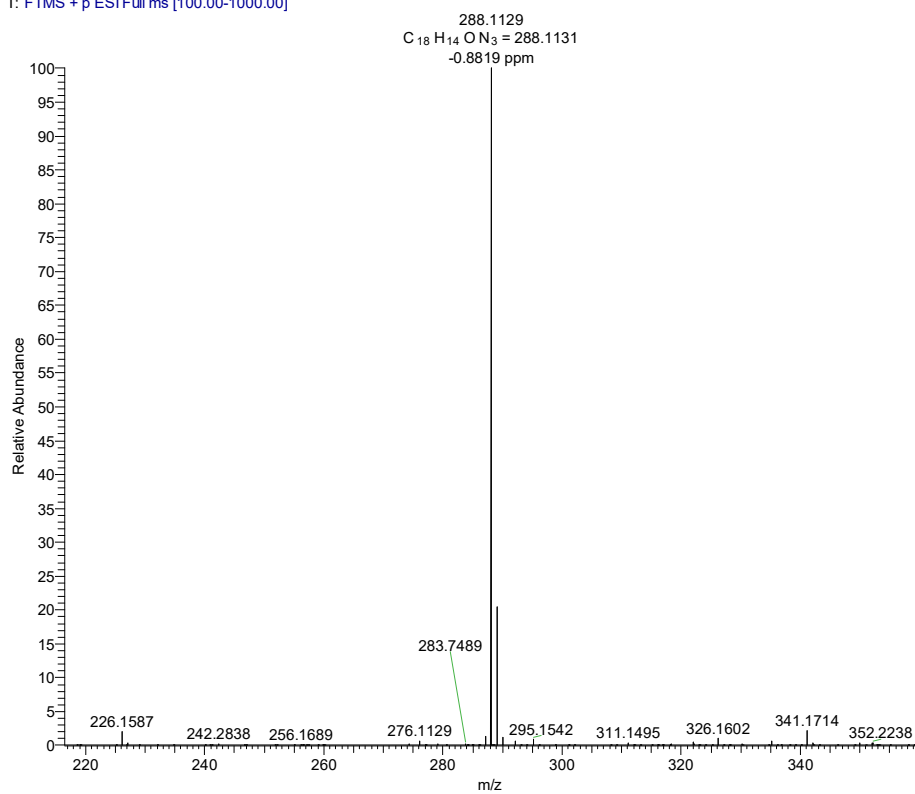

HRMS spectrum of **2a**

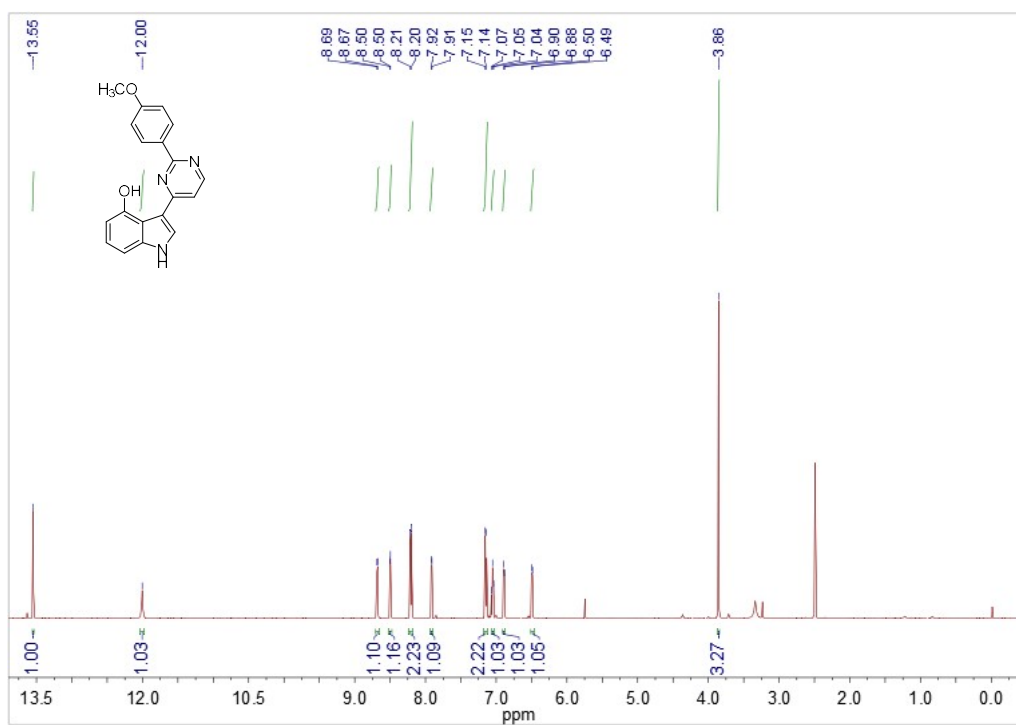

<sup>1</sup>H NMR Spectrum of **2b**

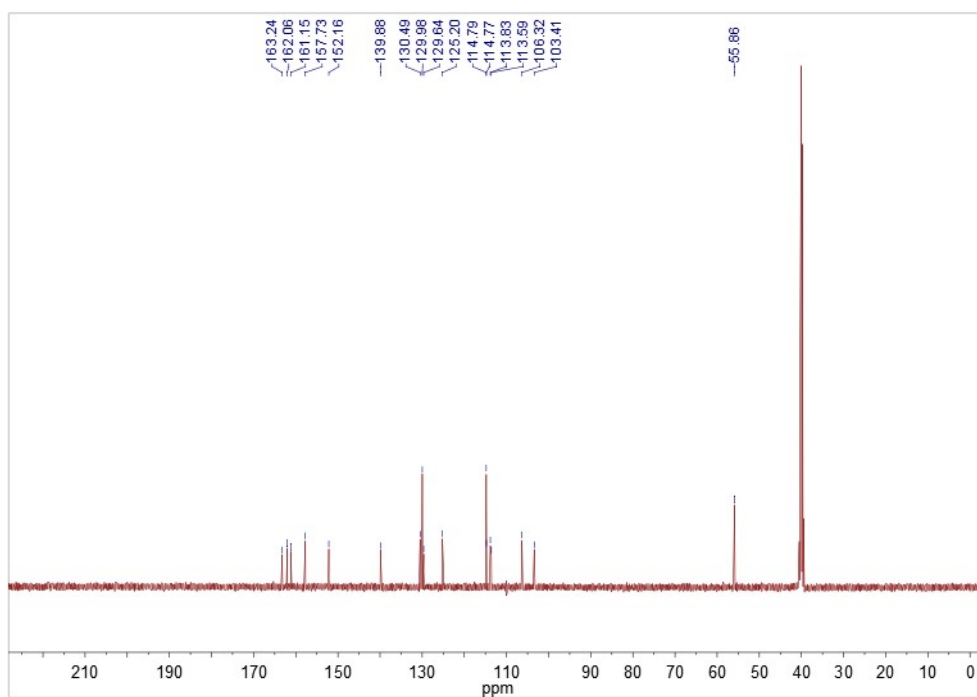

<sup>13</sup>C NMR Spectrum of **2b**

20180305-DXY-5a\_180306100350 #22 RT: 0.17 AV: 1 NL: 5.46E7  
T: FTMS + p ESI Full ms [100.00-1000.00]

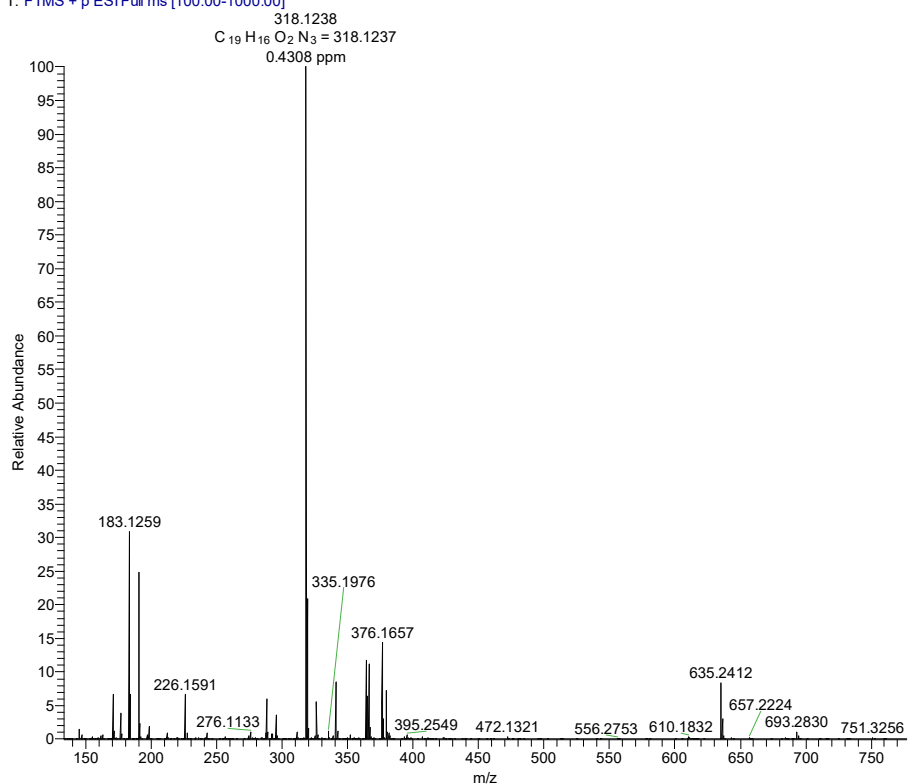

HRMS spectrum of **2b**

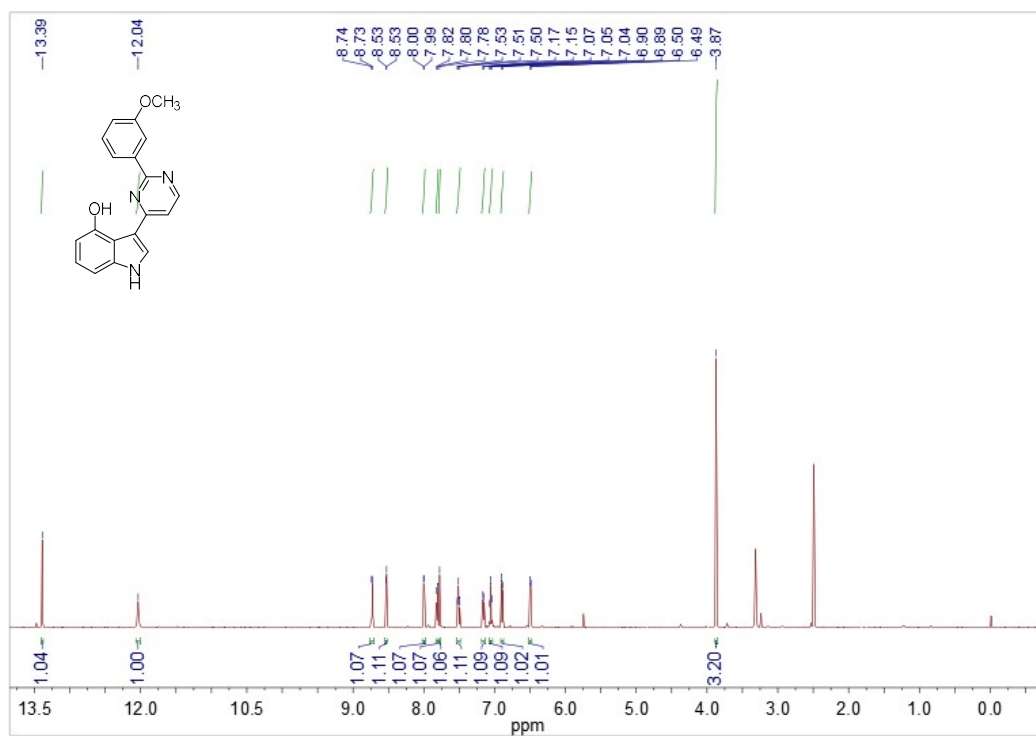

<sup>1</sup>H NMR Spectrum of **2c**

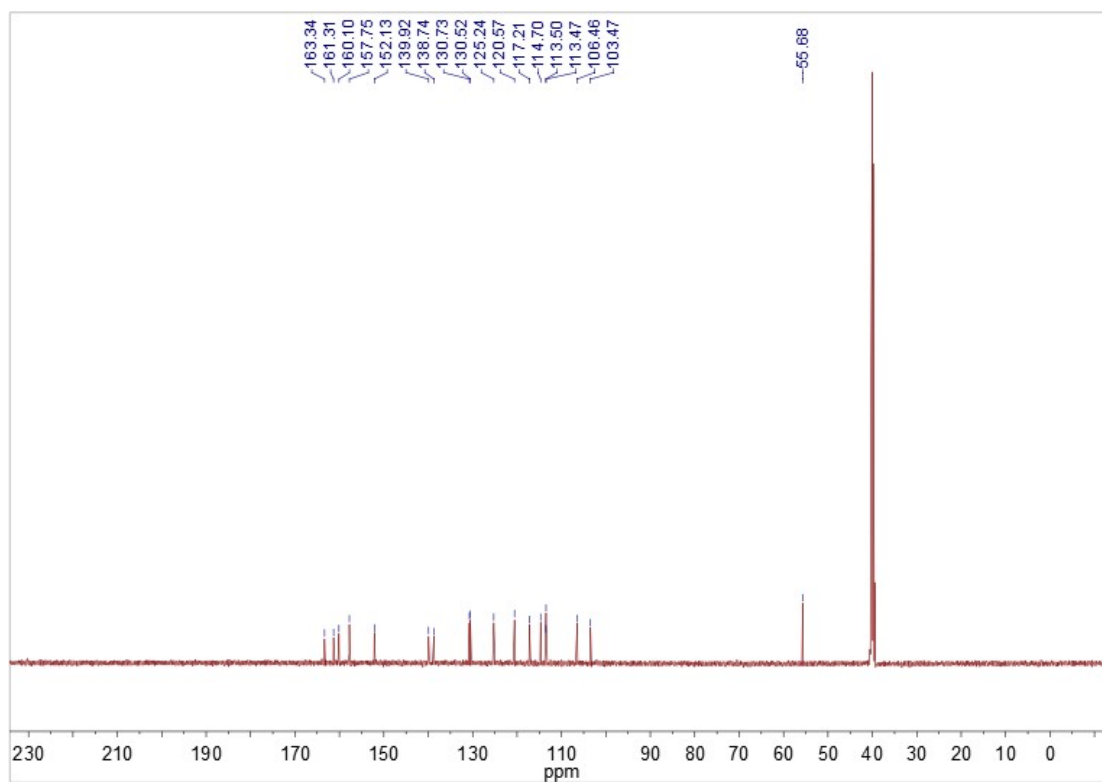

<sup>13</sup>C NMR Spectrum of **2c**

20180305-DXY-5b\_180306100350 #13 RT: 0.10 AV: 1 NL: 1.43E8  
T: FTMS + p ESI Full ms [100.00-1000.00]

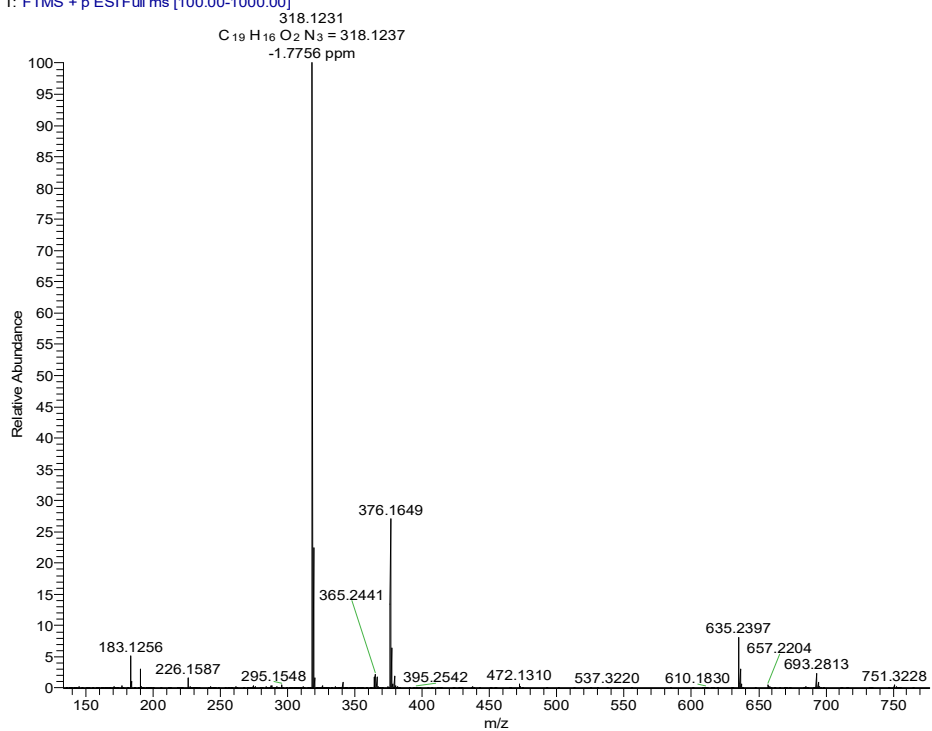

HRMS spectrum of **2c**

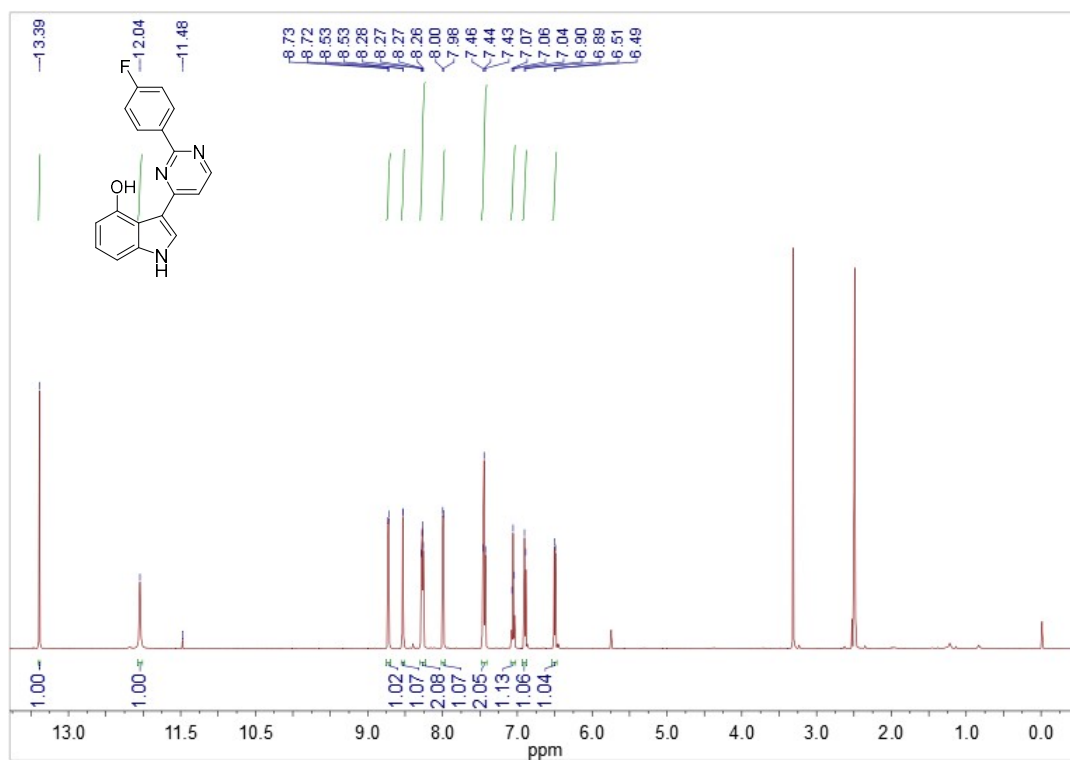

<sup>1</sup>H NMR Spectrum of **2d**



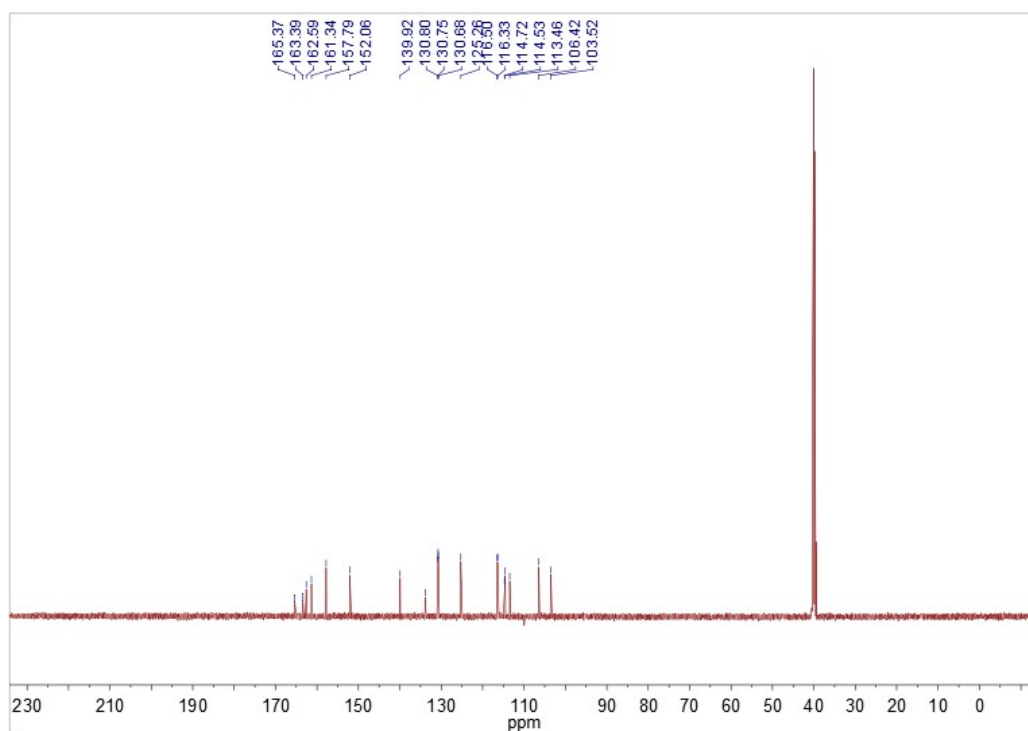

<sup>13</sup>C NMR Spectrum of **2d**

20180305-DXY-5c\_180306100350 #62 RT: 0.49 AV: 1 NL: 1.32E8  
T: FTMS + p ESI Full ms [100.00-1000.00]

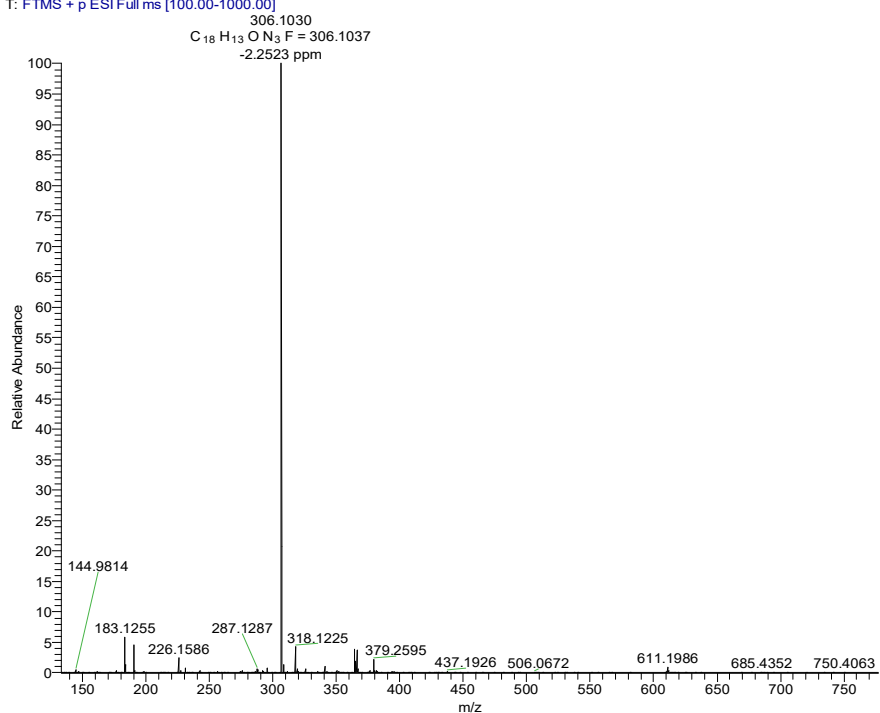

HRMS spectrum of **2d**

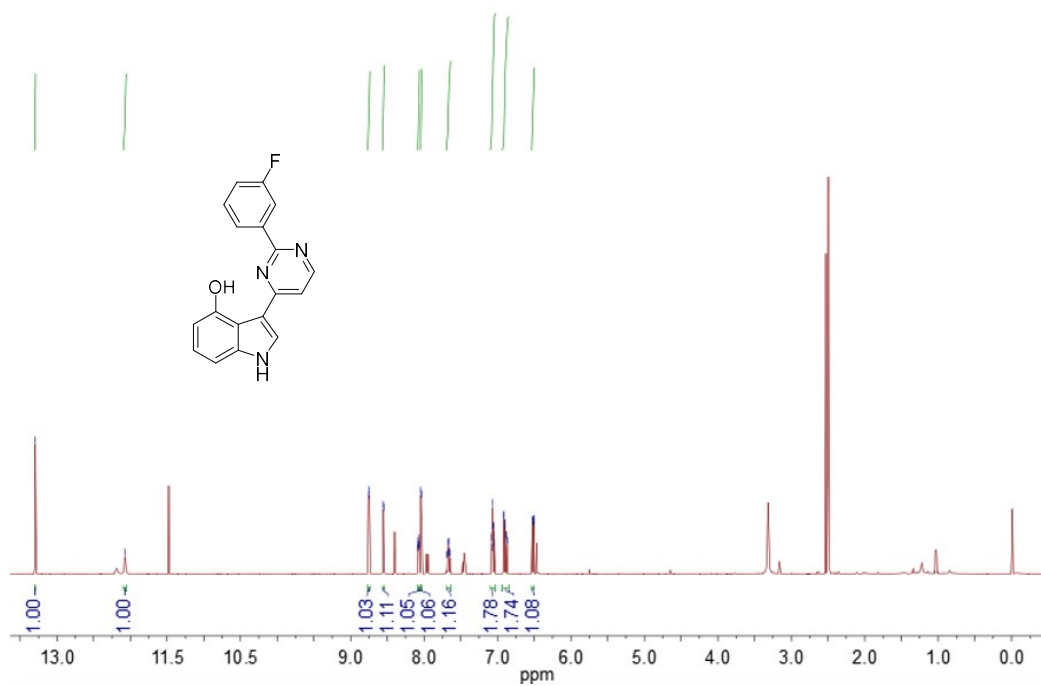

<sup>1</sup>H NMR Spectrum of **2e**

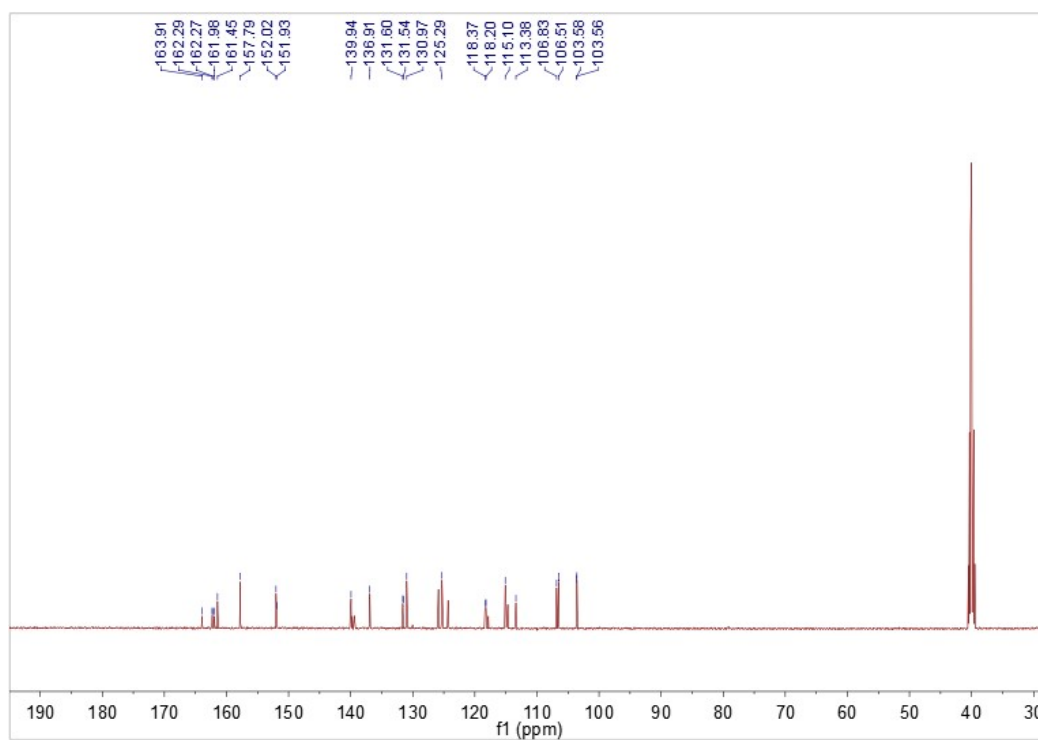

<sup>13</sup>C NMR Spectrum of **2e**

20180305-DXY-5d\_180306100350 #10 RT: 0.07 AV: 1 NL: 1.57E8  
T: FTMS + p ESI Full ms [100.00-1000.00]

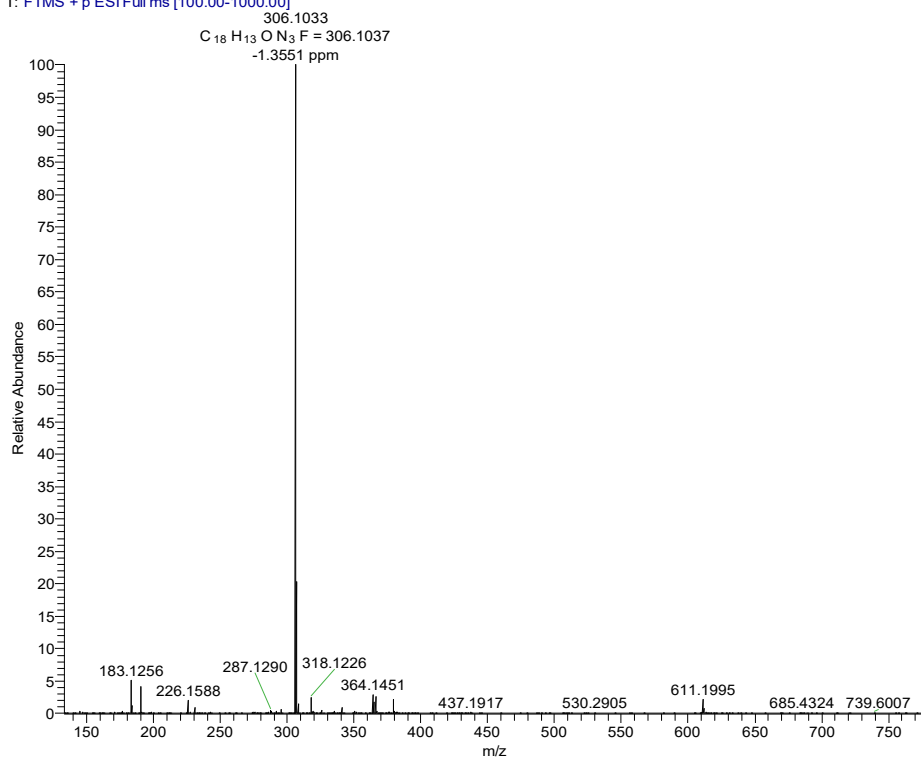

HRMS spectrum of **2e**

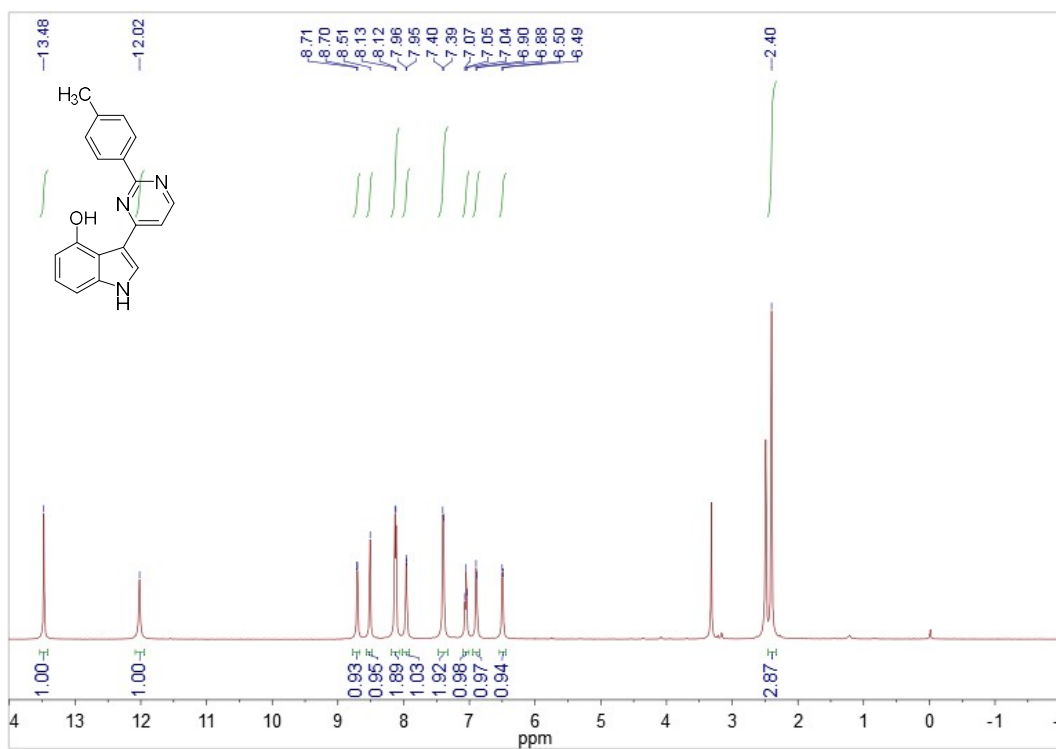

<sup>1</sup>H NMR Spectrum of **2f**

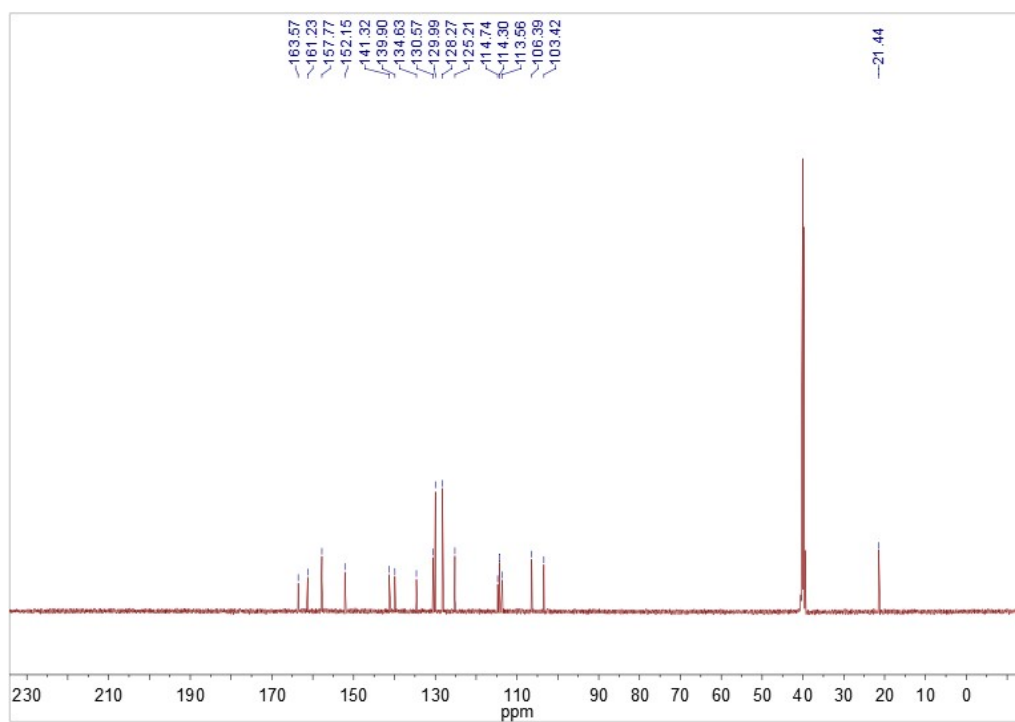

$^{13}\text{C}$  NMR Spectrum of **2f**

20180305-DXY-5e\_180306100350 #68 RT: 0.54 AV: 1 NL: 2.16E8  
T: FTMS + p ESI Full ms [100.00-1000.00]

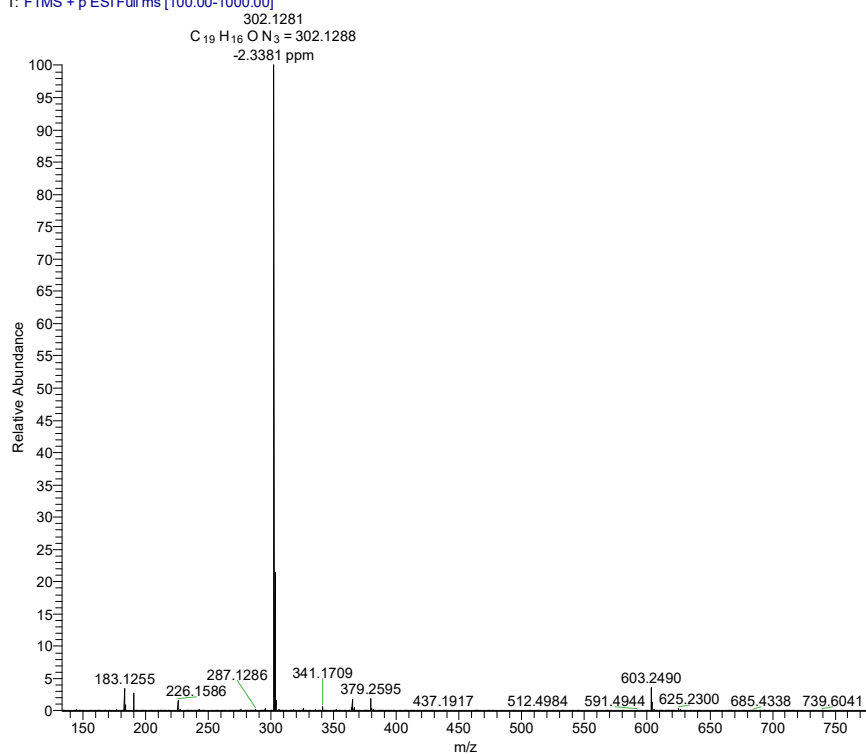

HRMS spectrum of **2f**

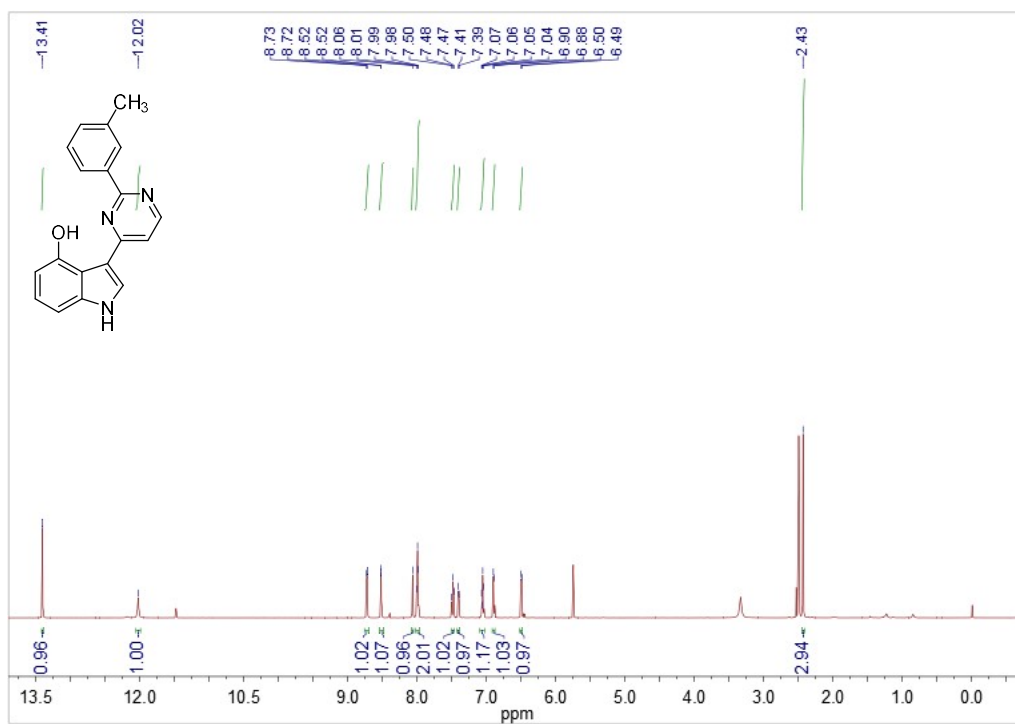

<sup>1</sup>H NMR Spectrum of **2g**

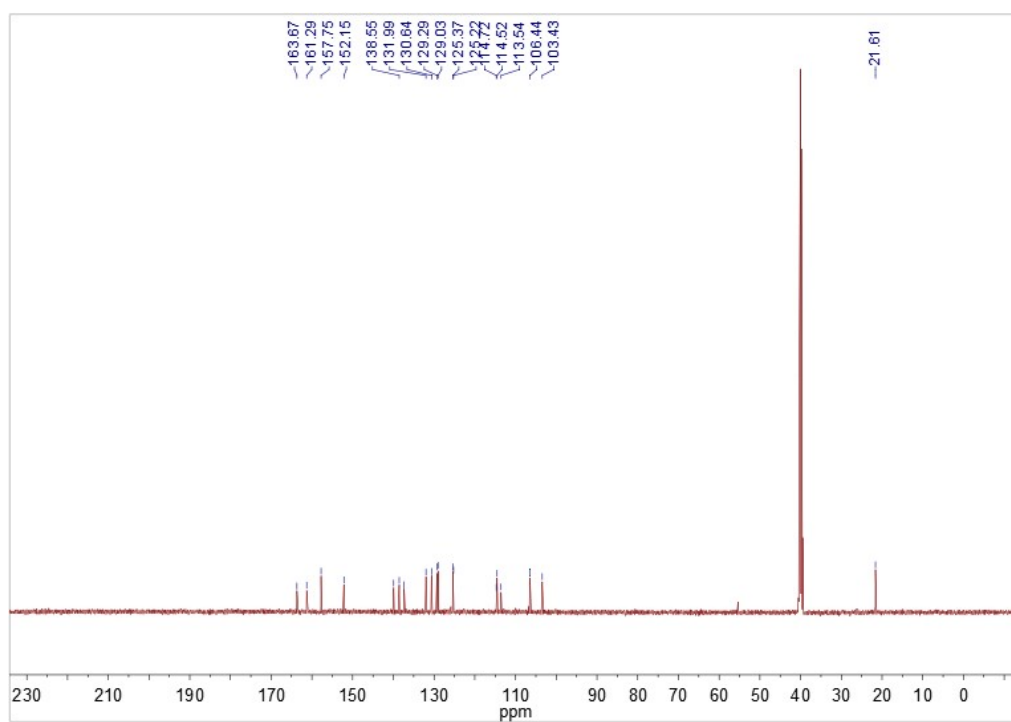

<sup>13</sup>C NMR Spectrum of **2g**

20180305-DXY-5f\_180306100350 #9 RT: 0.07 AV: 1 NL: 2.16E8  
T: FTMS + p ESI Full ms [100.00-1000.00]

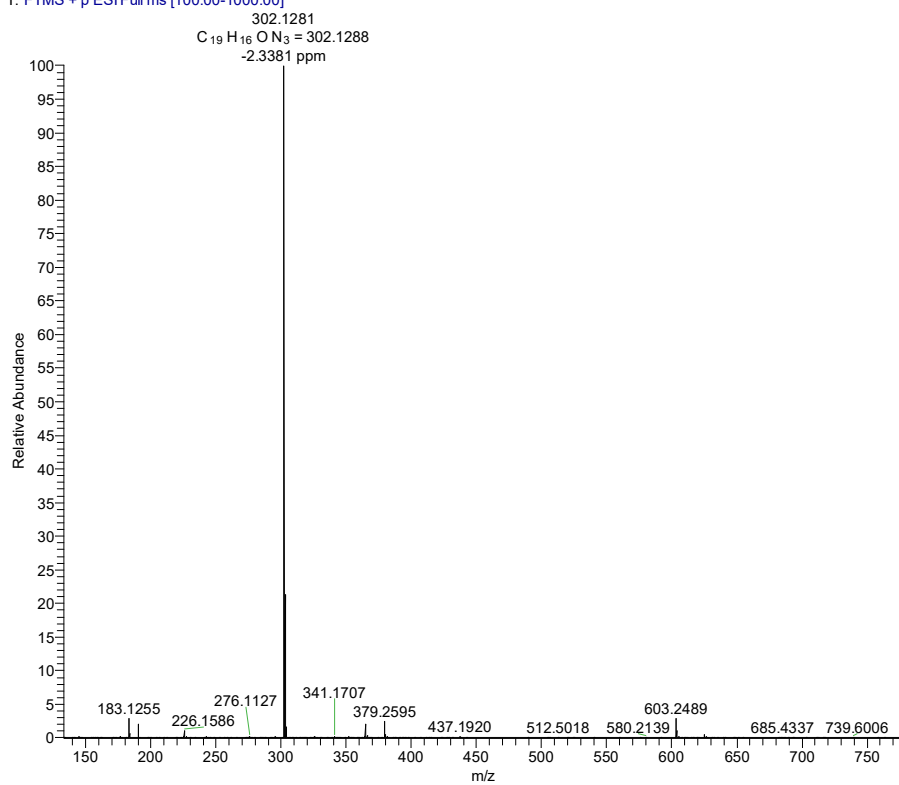

HRMS spectrum of **2g**

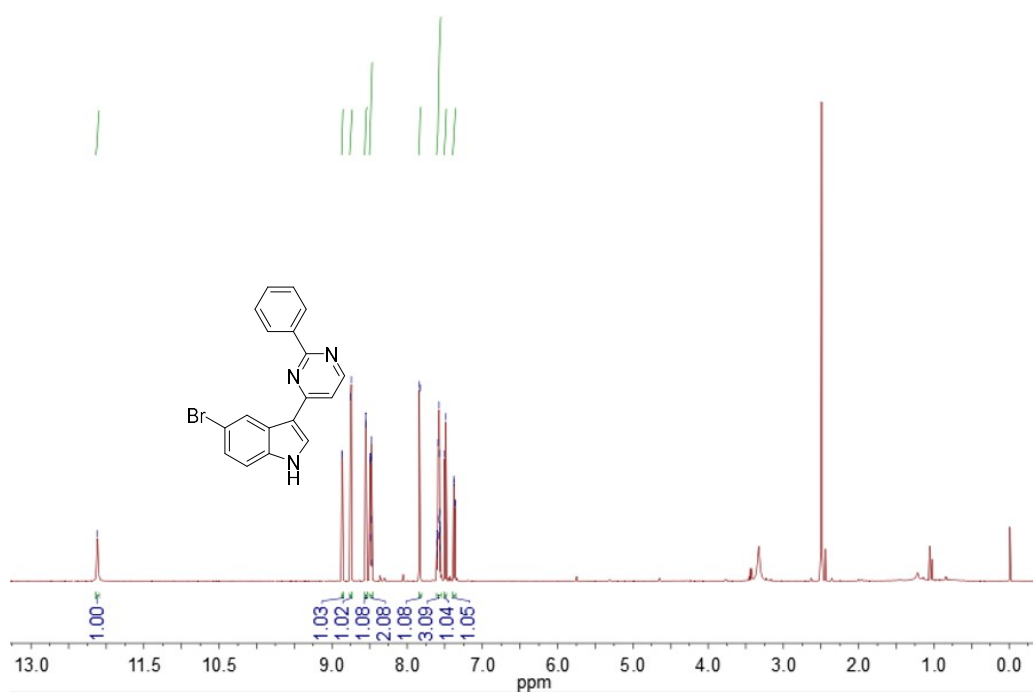

<sup>1</sup>H NMR Spectrum of **3a**

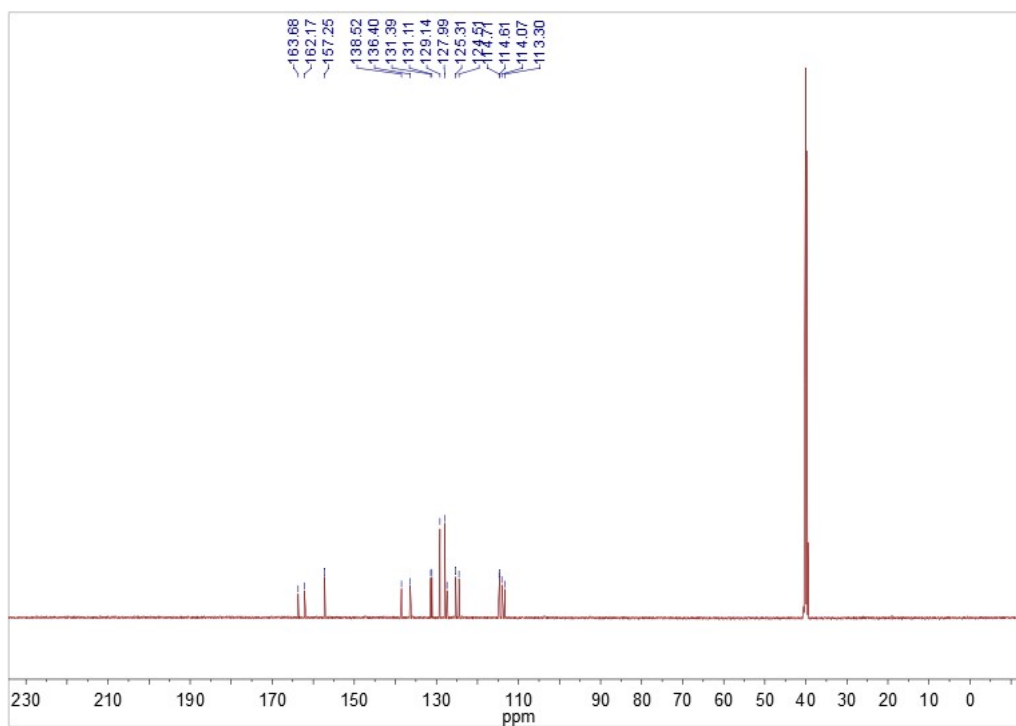

$^{13}\text{C}$  NMR Spectrum of **3a**

20180305-DXY-4\_180306100350 #12 RT: 0.09 AV: 1 NL: 1.42E8  
T: FTMS + p ESI Full ms [100.00-1000.00]

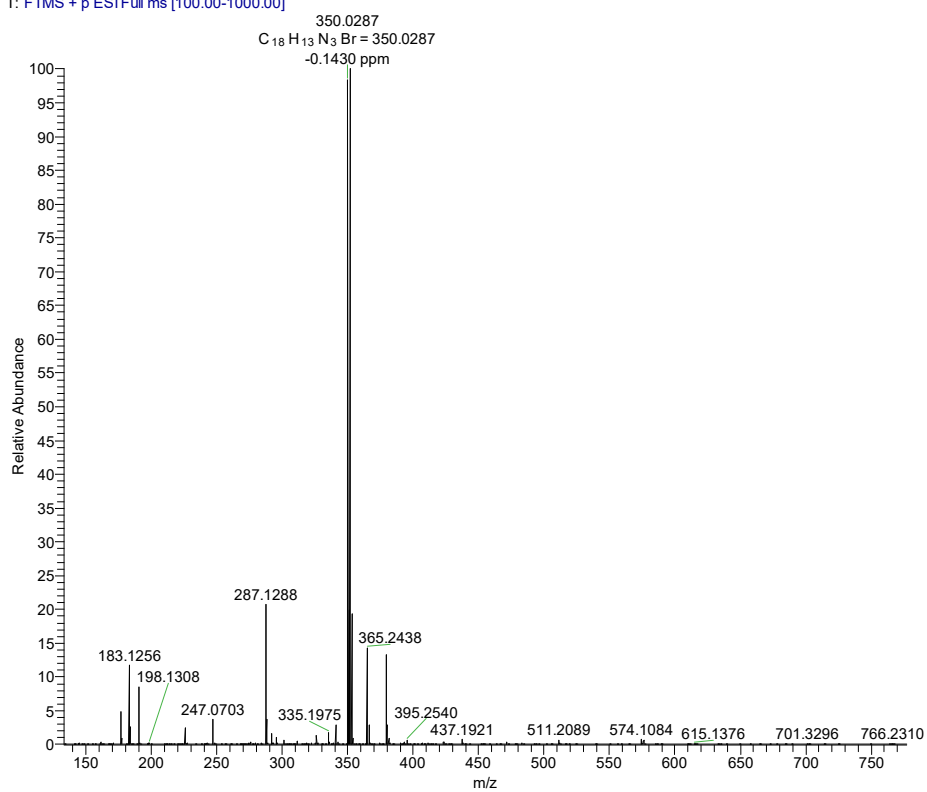

HRMS spectrum of **3a**

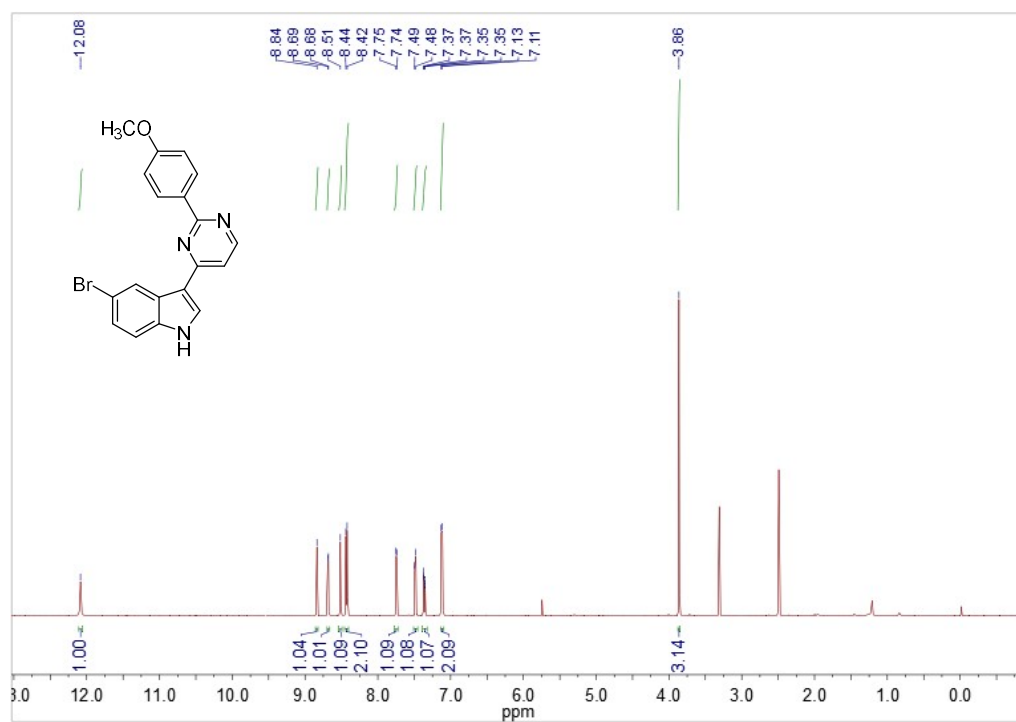

<sup>1</sup>H NMR Spectrum of **3b**

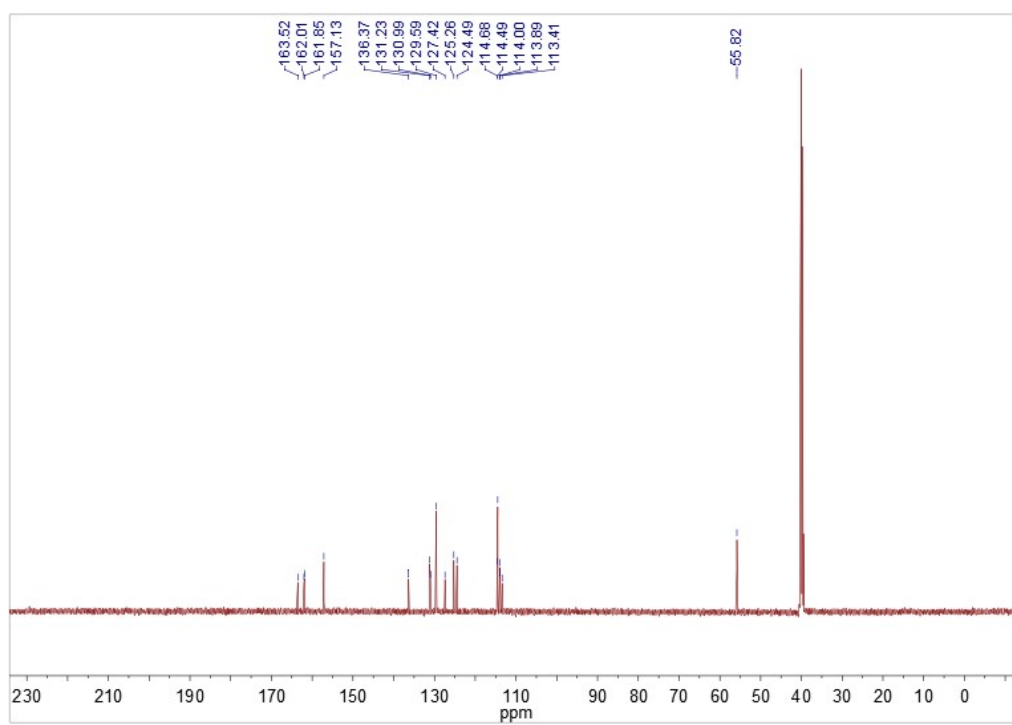

<sup>13</sup>C NMR Spectrum of **3b**



20210707-3B\_210705141924 #7 RT: 0.06 AV: 1 NL: 2.19E7  
T: FTMS + c ESI Full ms [150.00-2000.00]

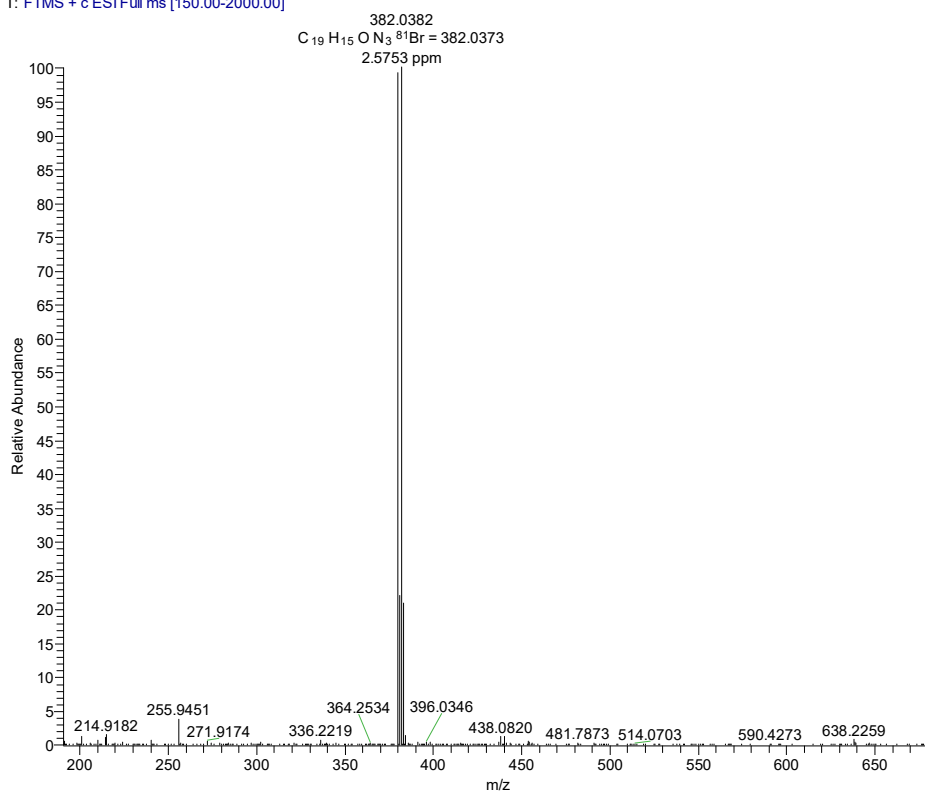

HRMS spectrum of **3b**

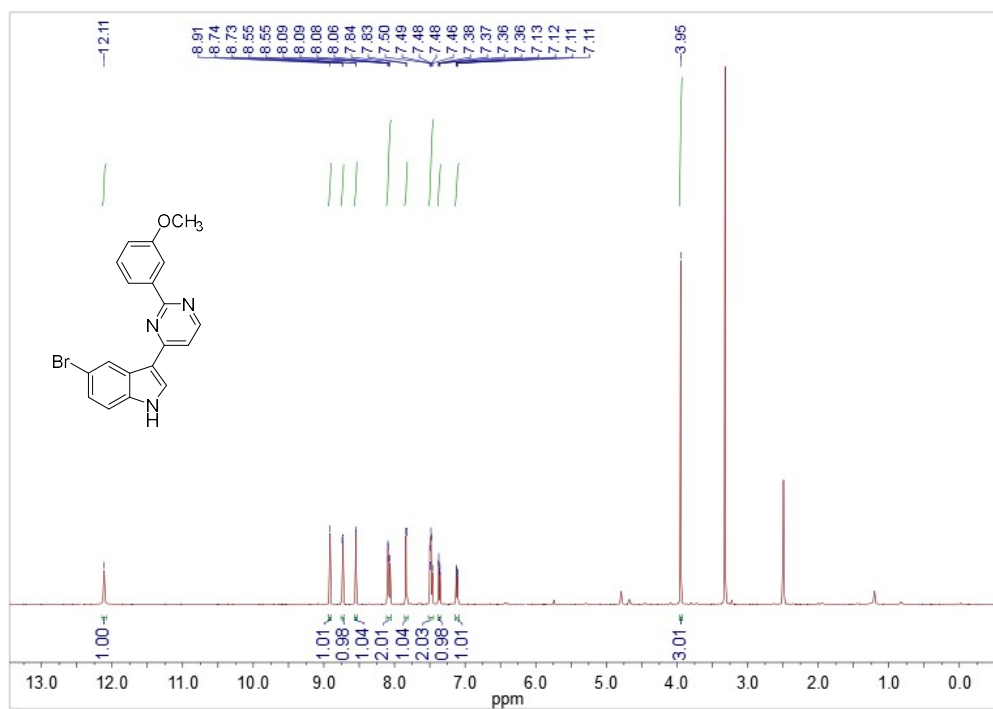

<sup>1</sup>H NMR Spectrum of **3c**

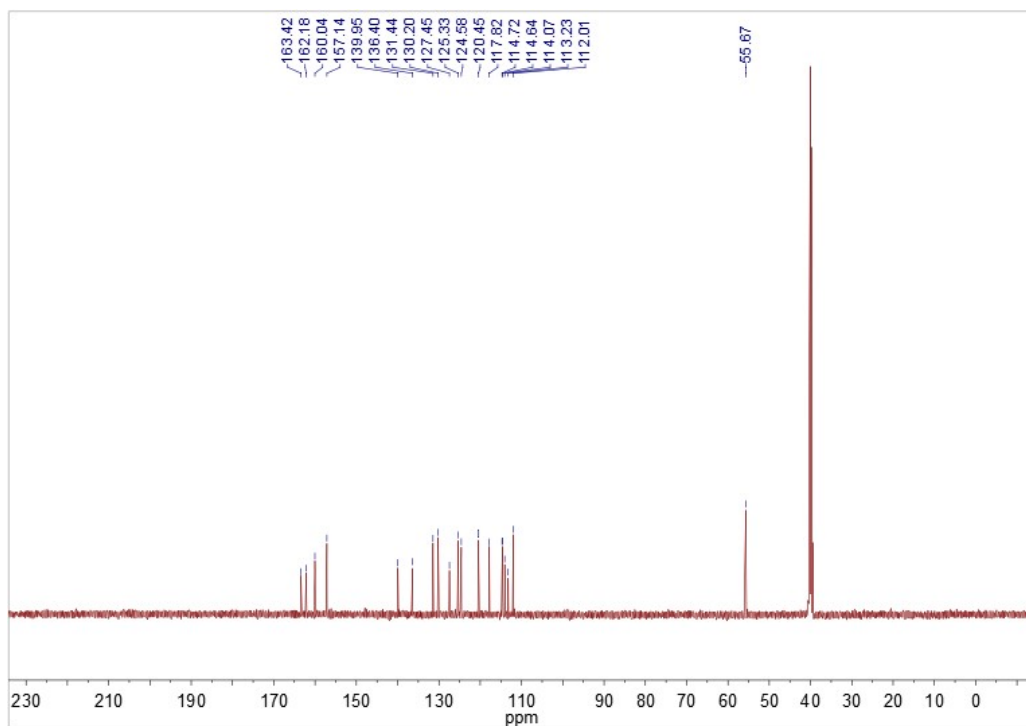

$^{13}\text{C}$  NMR Spectrum of **3c**

20210707-3C\_210705141924 #37 RT: 0.49 AV: 1 NL: 1.75E7  
T: FTMS + c ESI Full ms [150.00-2000.00]

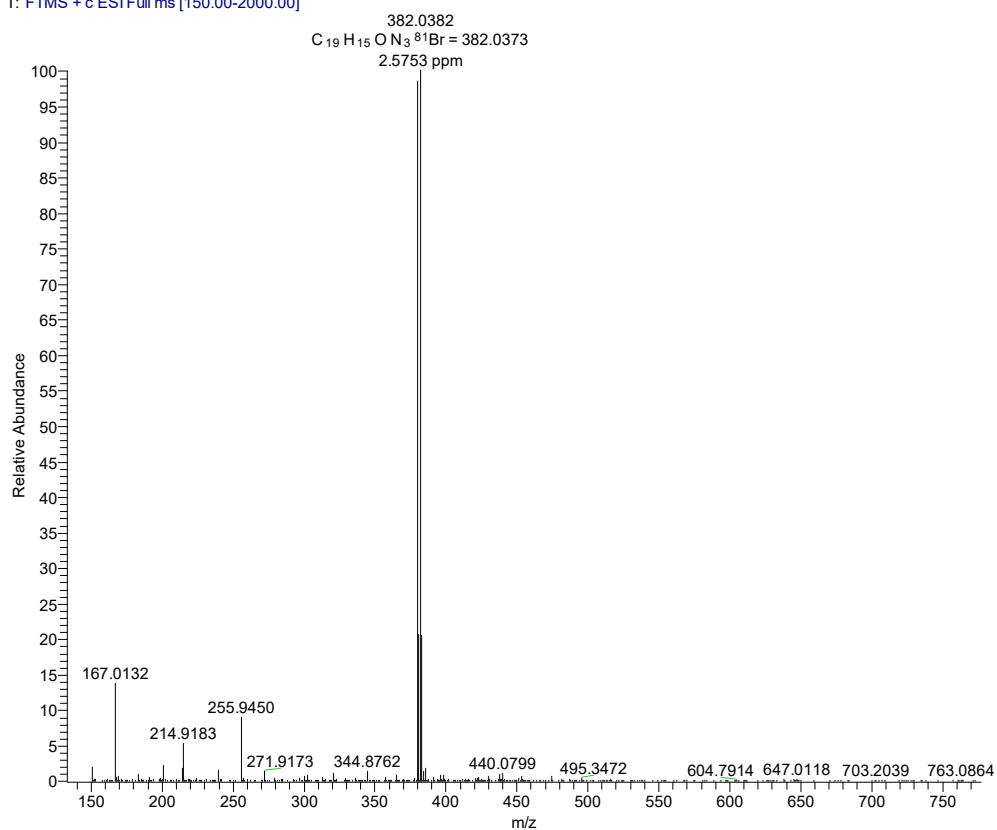

HRMS spectrum of **3c**

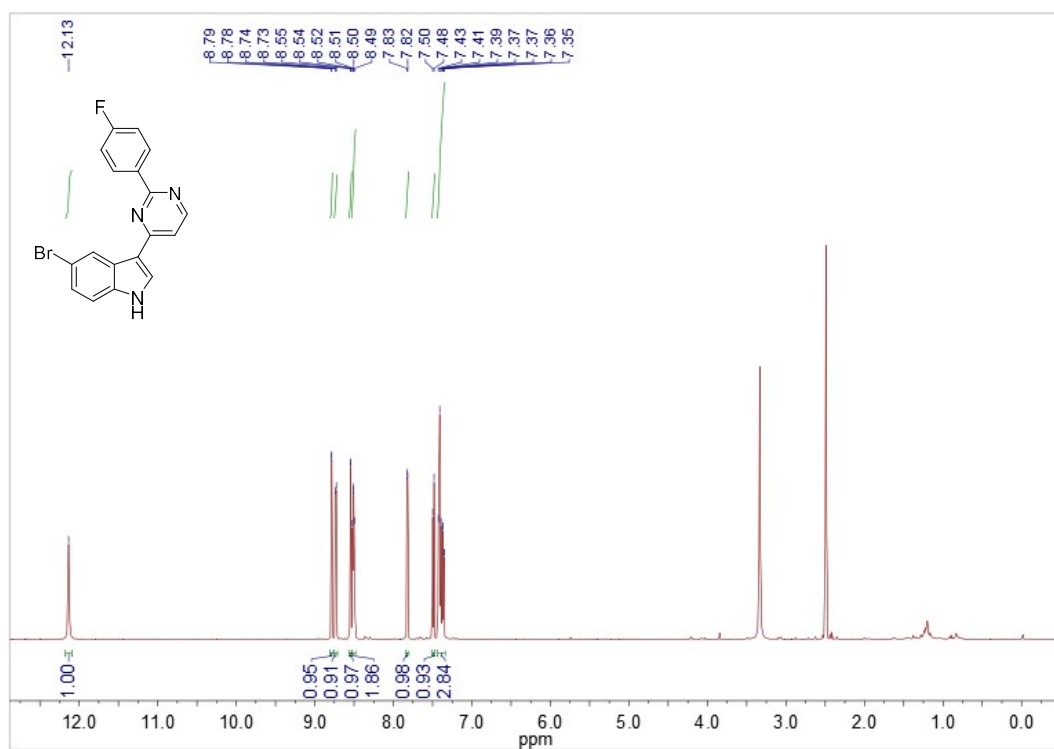

<sup>1</sup>H NMR Spectrum of **3d**

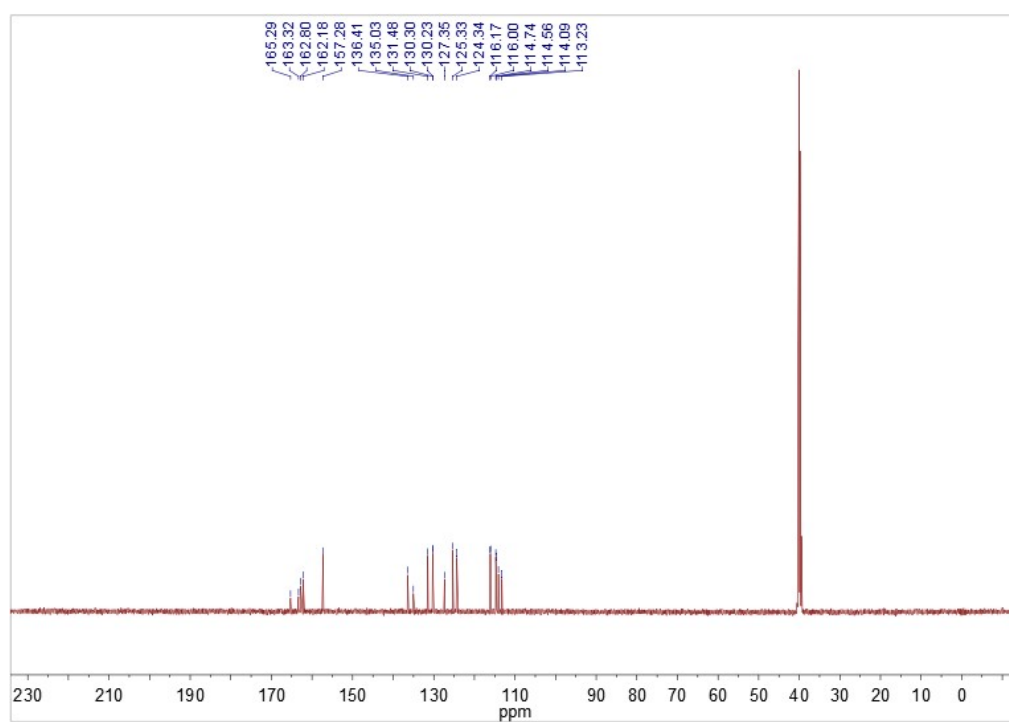

<sup>13</sup>C NMR Spectrum of **3d**

20180305-DXY-4c\_180306100350 #18 RT: 0.14 AV: 1 NL: 9.70E7  
T: FTMS + p ESI Full ms [100.00-1000.00]

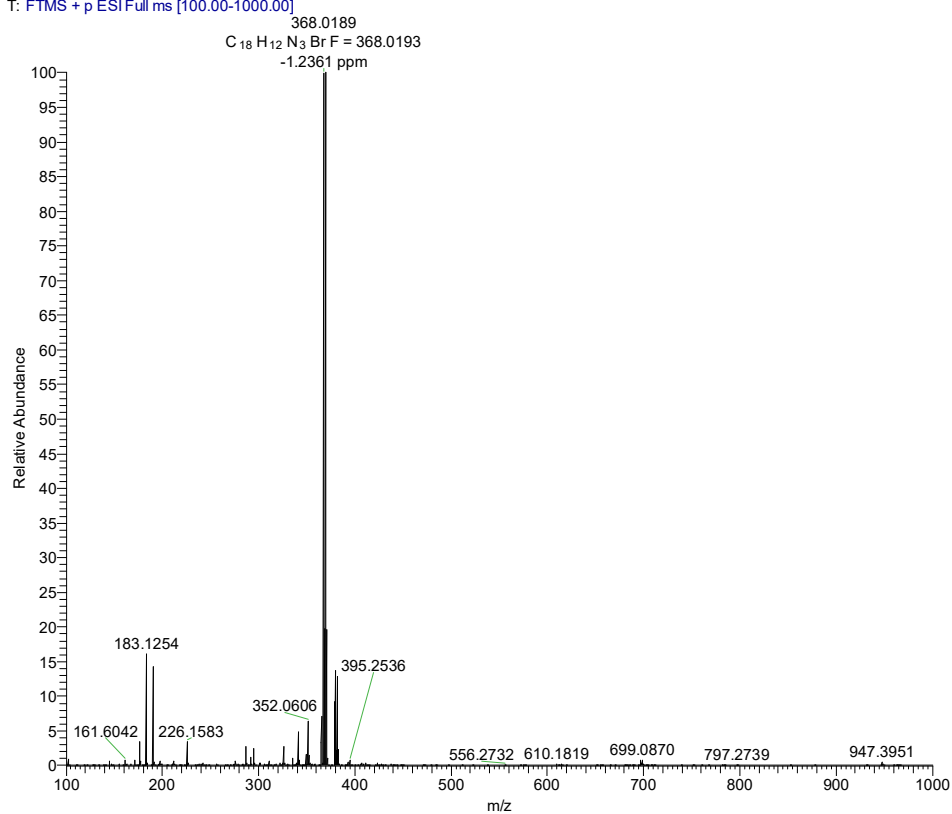

HRMS spectrum of **3d**

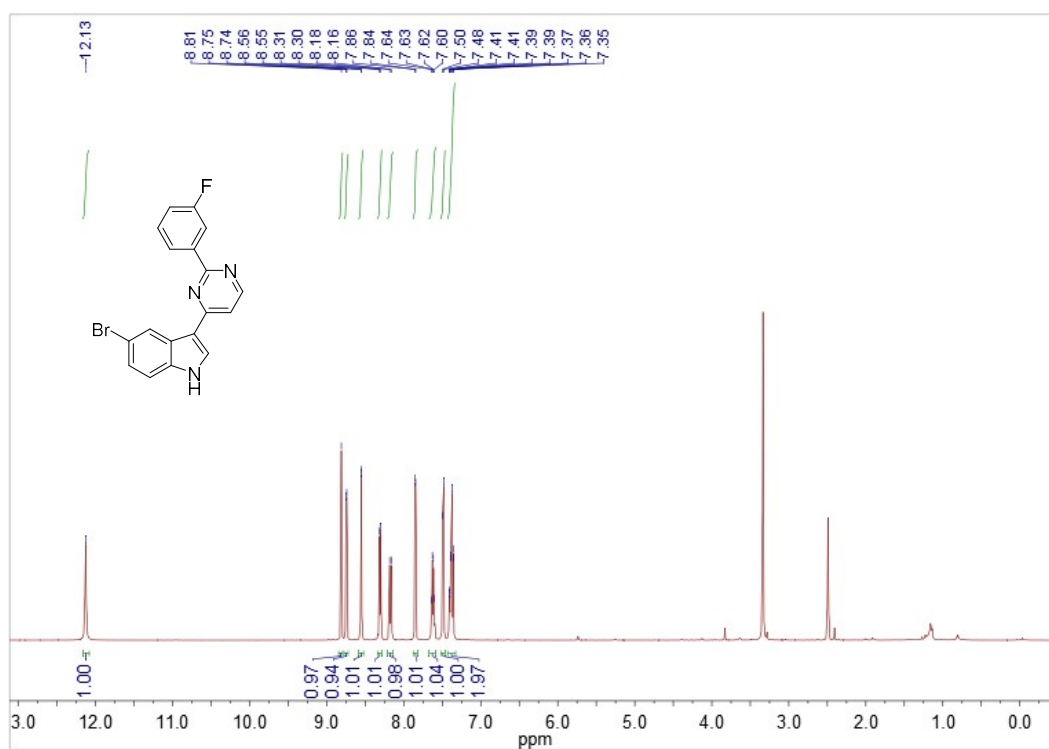

<sup>1</sup>H NMR Spectrum of **3e**

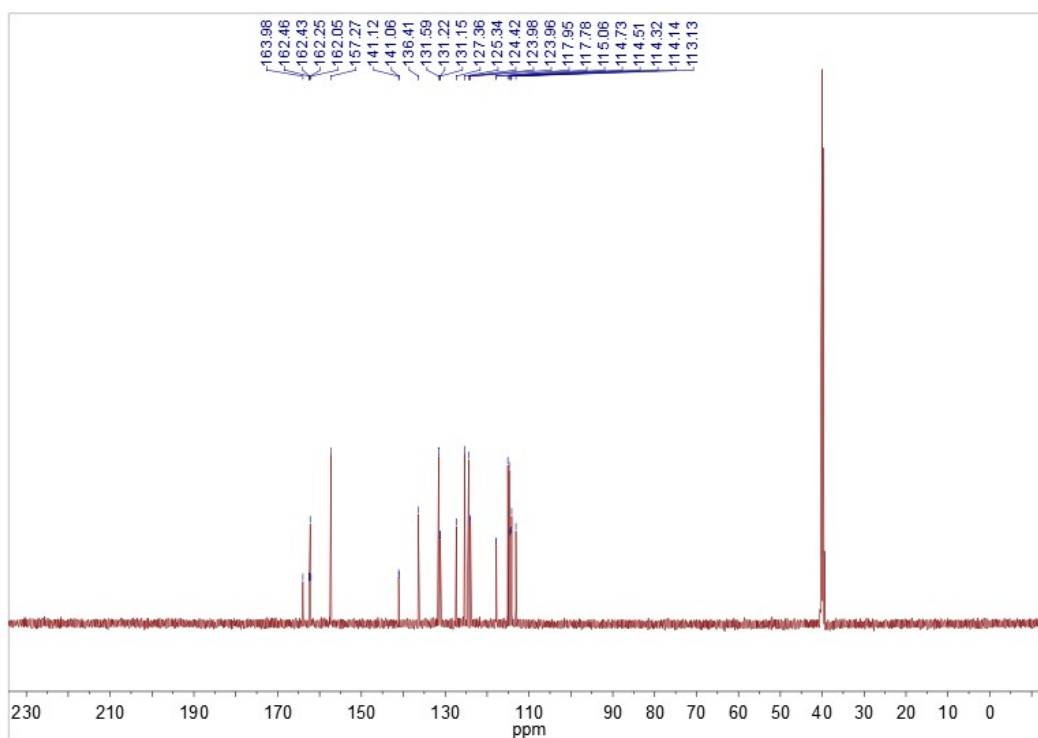

$^{13}\text{C}$  NMR Spectrum of **3e**

20180305-DXY-4d\_180306100350 #13 RT: 0.10 AV: 1 NL: 8.27E7  
T: FTMS + p ESI Full ms [100.00-1000.00]

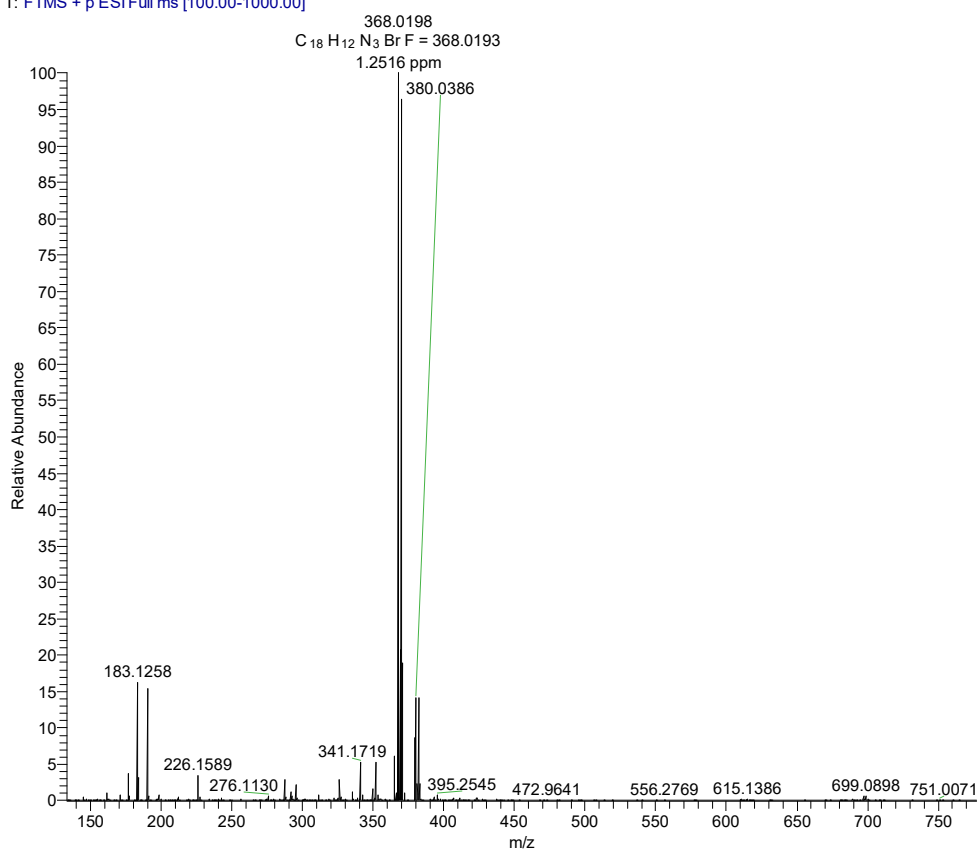

HRMS spectrum of **3e**

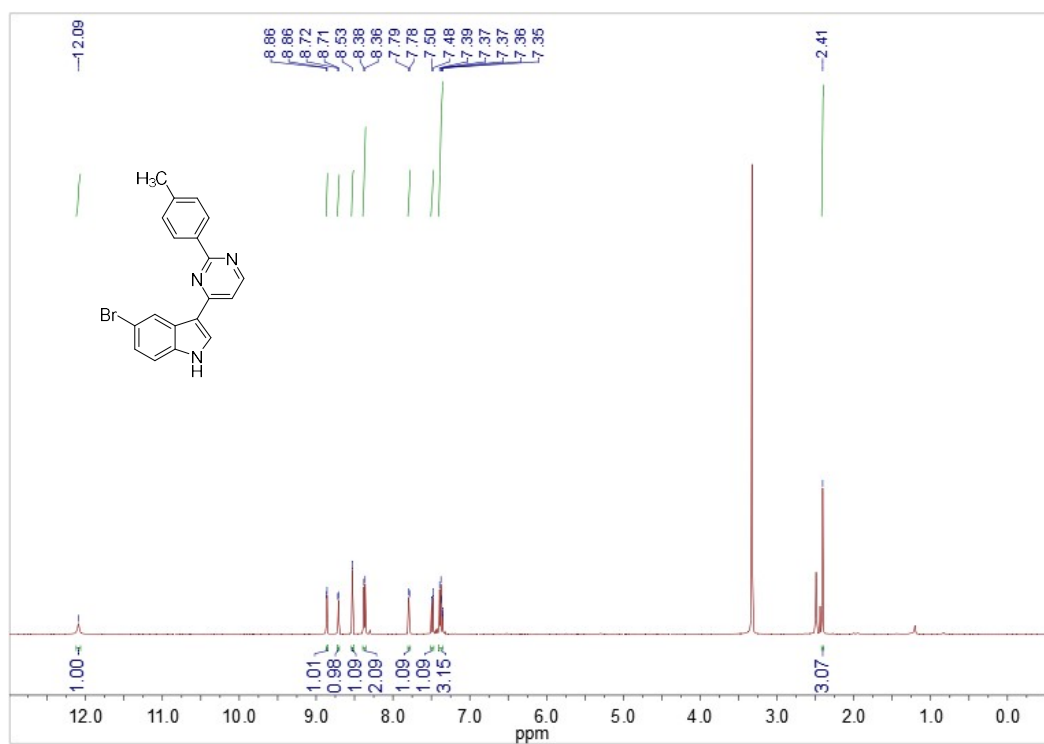

<sup>1</sup>H NMR Spectrum of **3f**

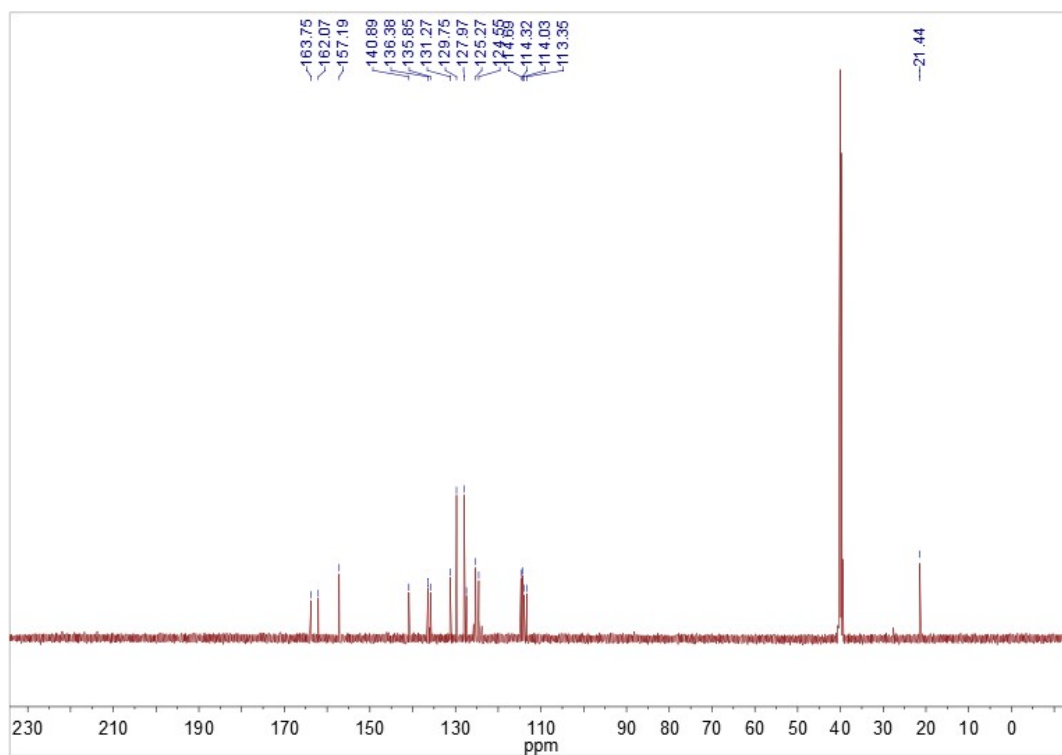

<sup>13</sup>C NMR Spectrum of **3f**

20180305-DXY-4e\_180306100350 #5 RT: 0.03 AV: 1 NL: 1.78E8  
T: FTMS + p ESI Full ms [100.00-1000.00]

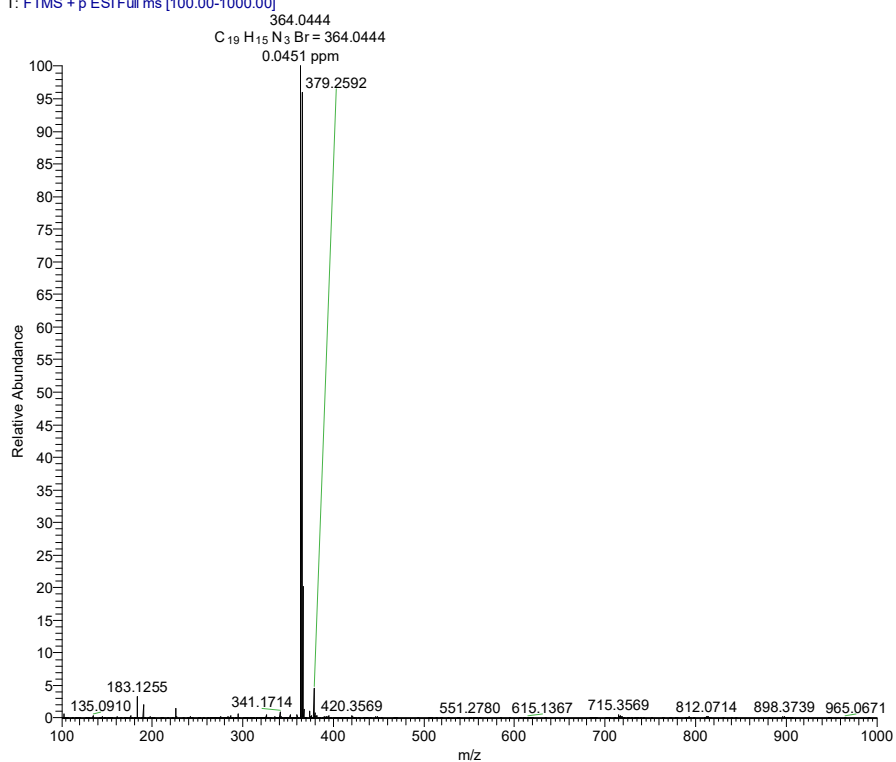

HRMS spectrum of **3f**

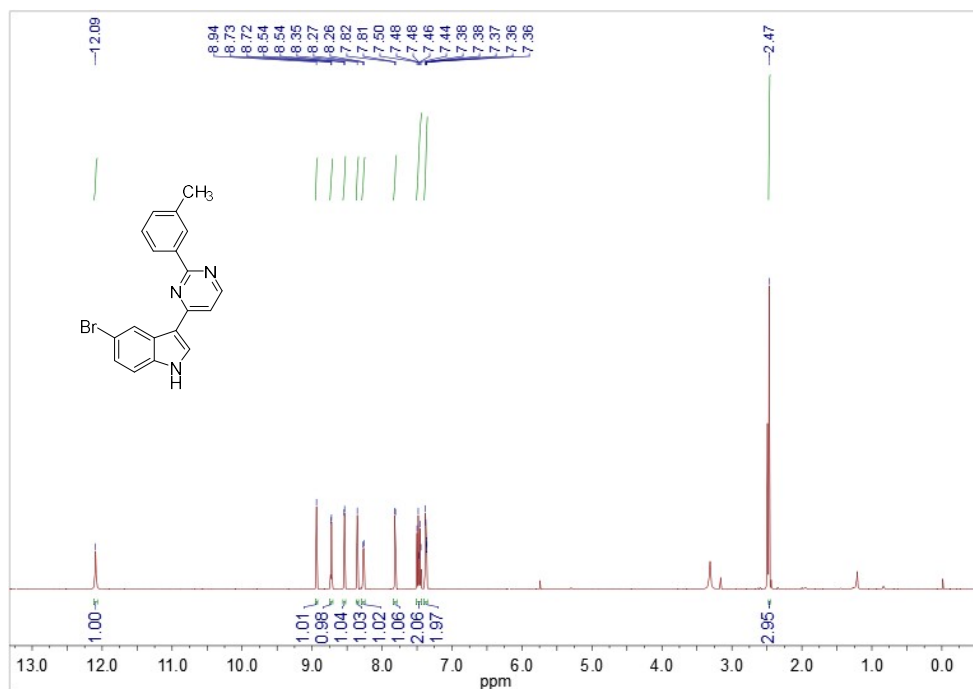

<sup>1</sup>H NMR Spectrum of **3g**

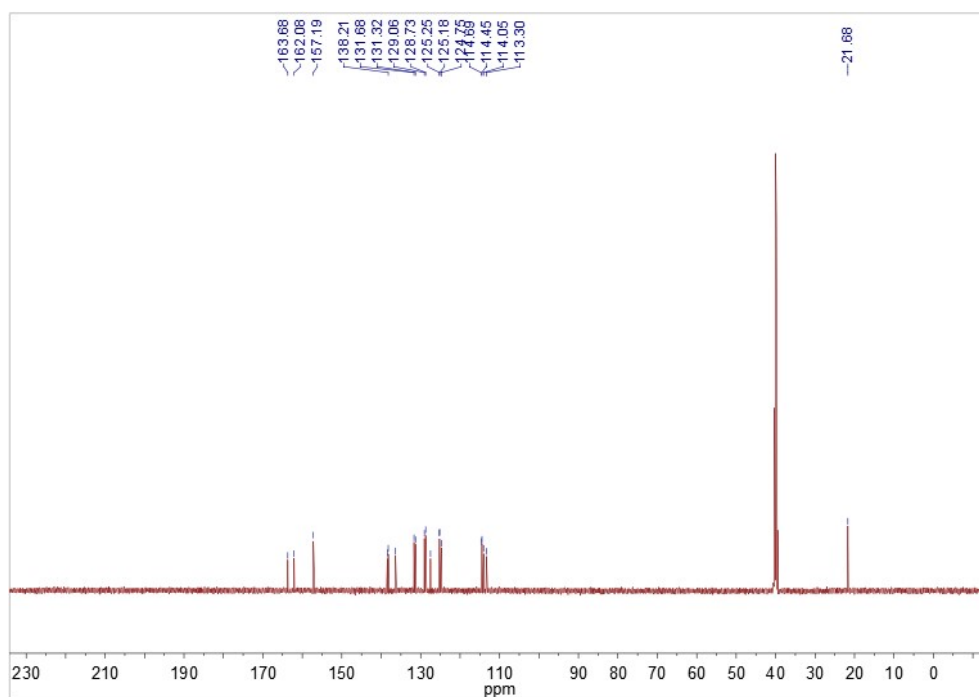

$^{13}\text{C}$  NMR Spectrum of **3g**

20180305-DXY-4f\_180306100350 #18 RT: 0.13 AV: 1 NL: 1.96E8  
T: FTMS + p ESI Full ms [100.00-1000.00]

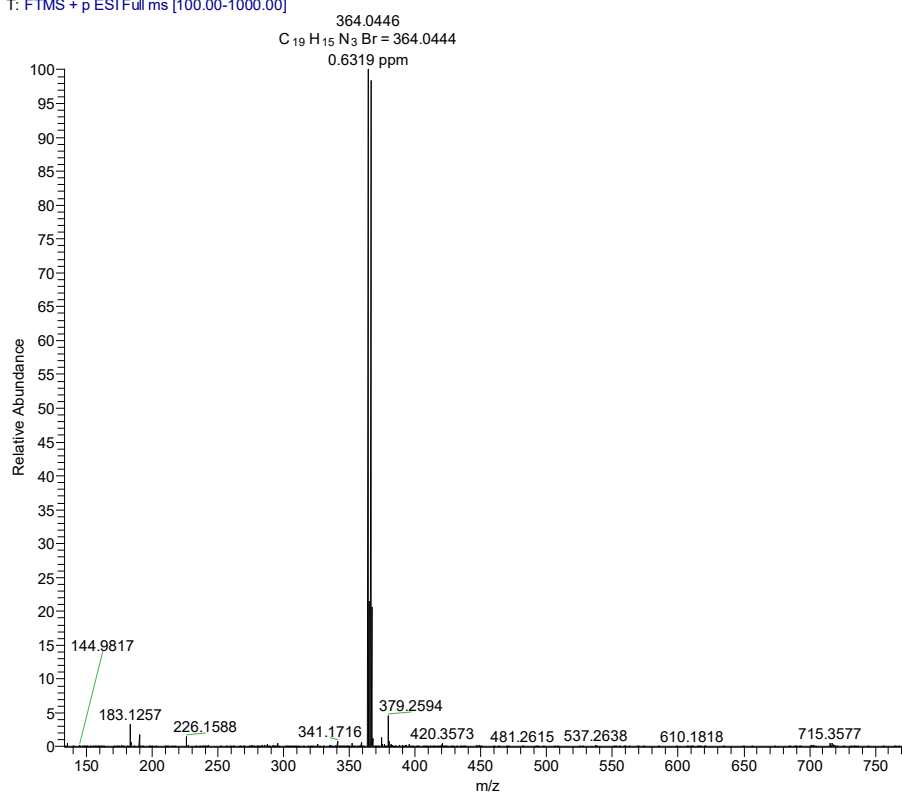

HRMS spectrum of **3g**



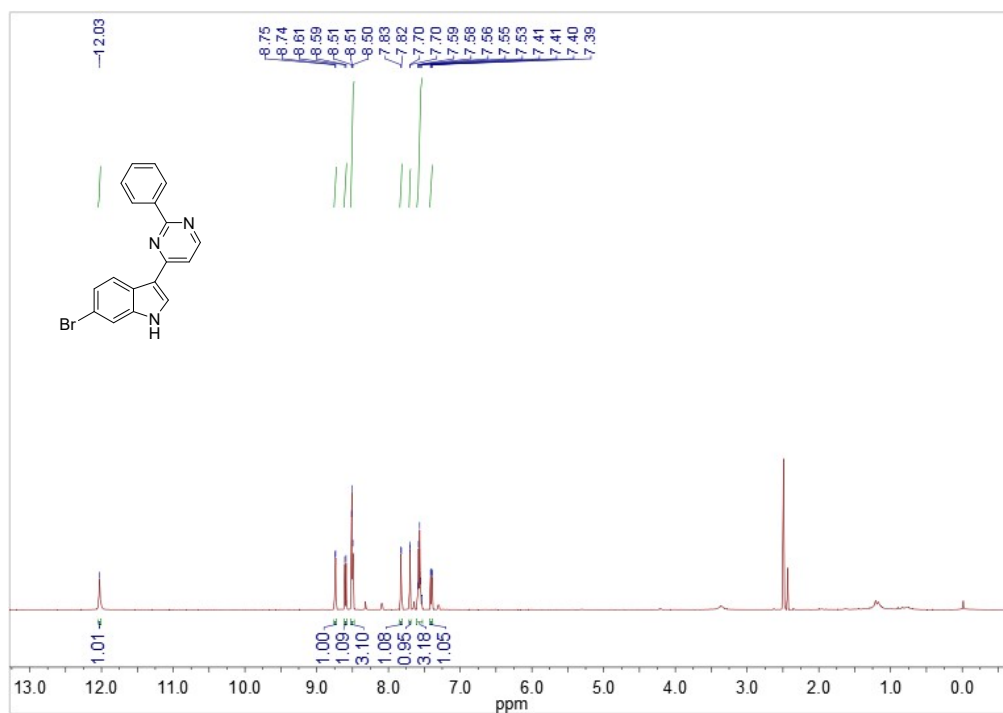

<sup>1</sup>H NMR Spectrum of **4a**

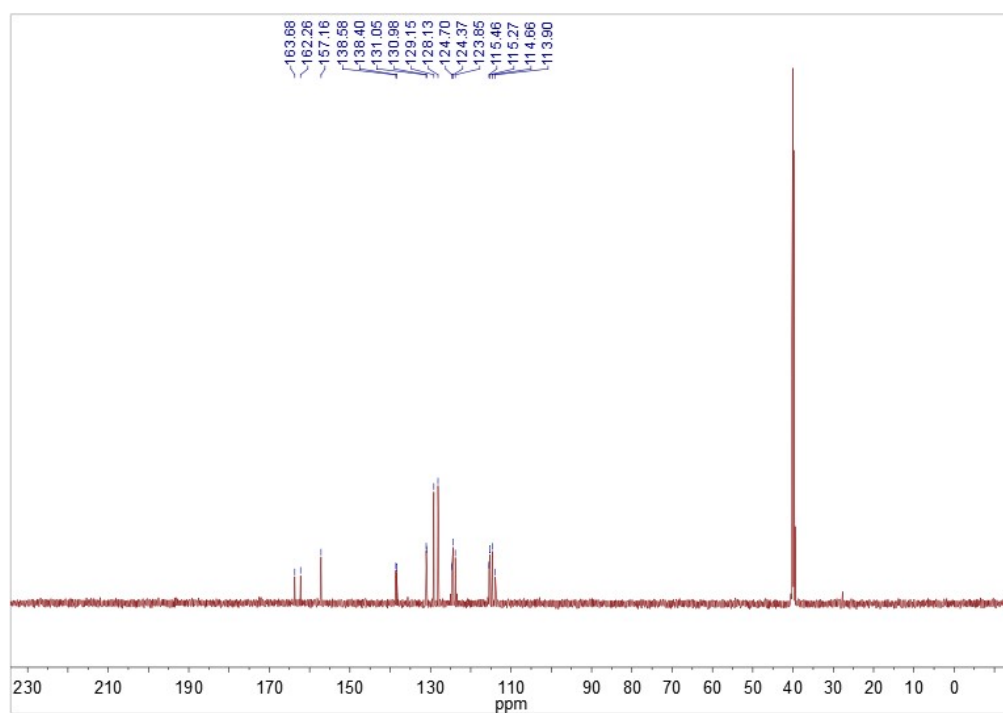

<sup>13</sup>C NMR Spectrum of **4a**

20180305-DXY-3\_180306100350 #43 RT: 0.33 AV: 1 NL: 1.47E8  
T: FTMS + p ESI Full ms [100.00-1000.00]

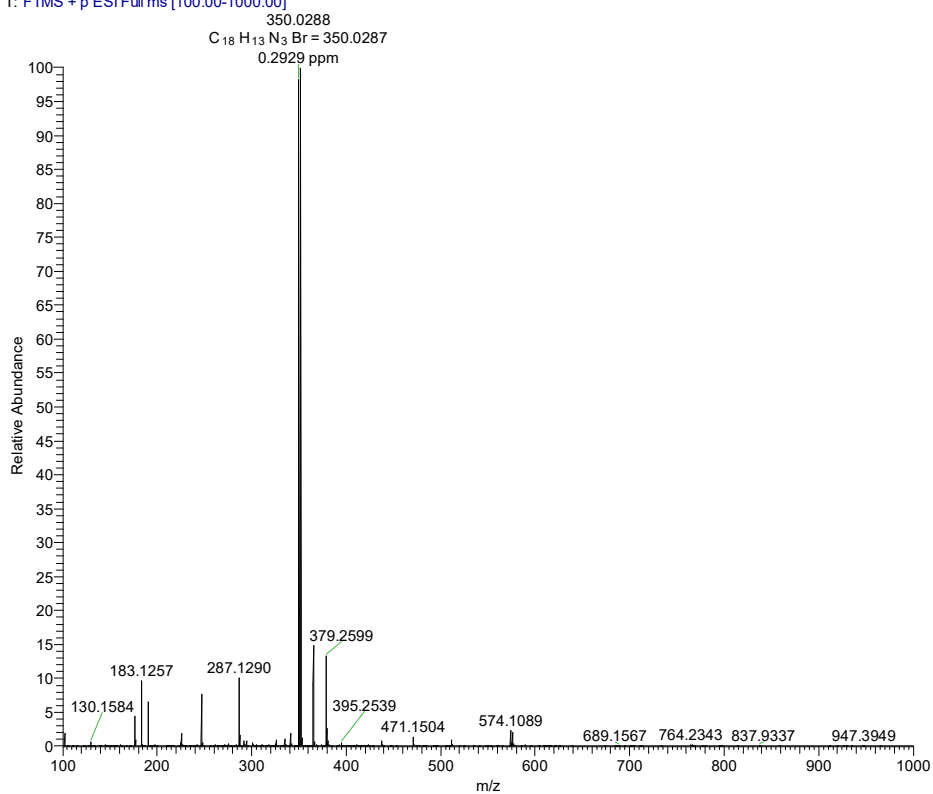

HRMS spectrum of **4a**

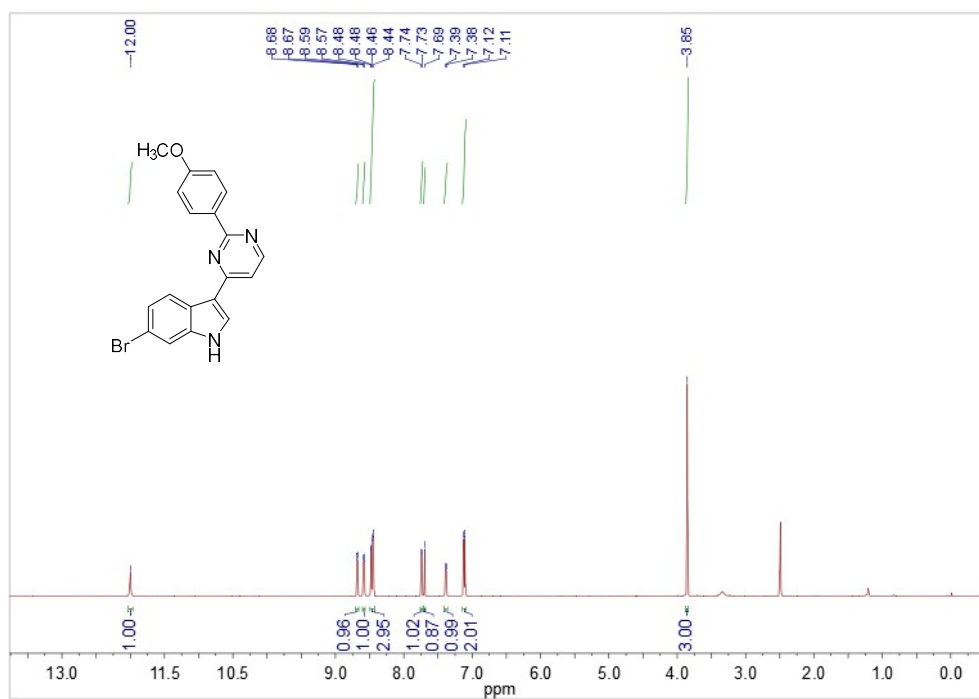

<sup>1</sup>H NMR Spectrum of **4b**

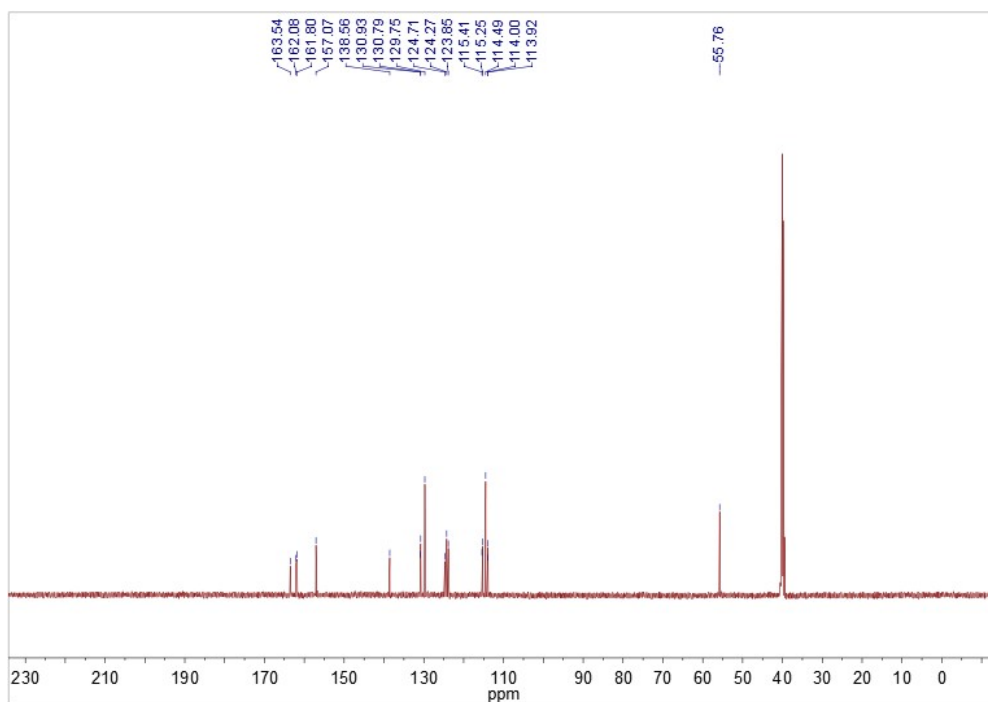

$^{13}\text{C}$  NMR Spectrum of **4b**

20210707-4B\_210705141924 #23 RT: 0.18 AV: 1 NL: 2.43E7  
T: FTMS + c ESI Full ms [150.00-2000.00]

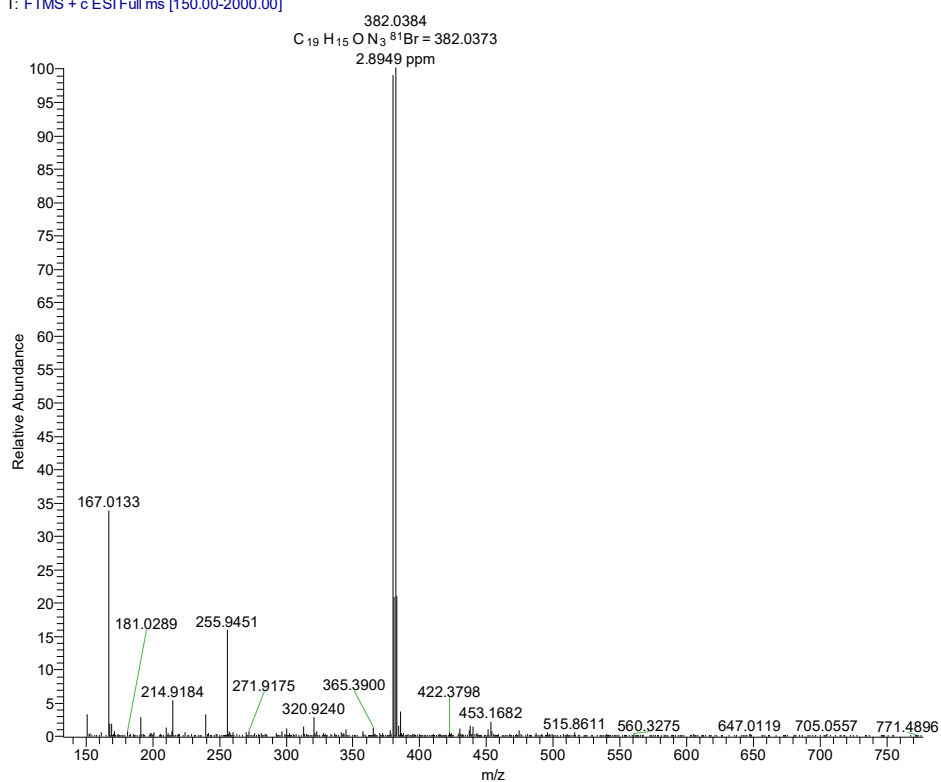

HRMS spectrum of **4b**

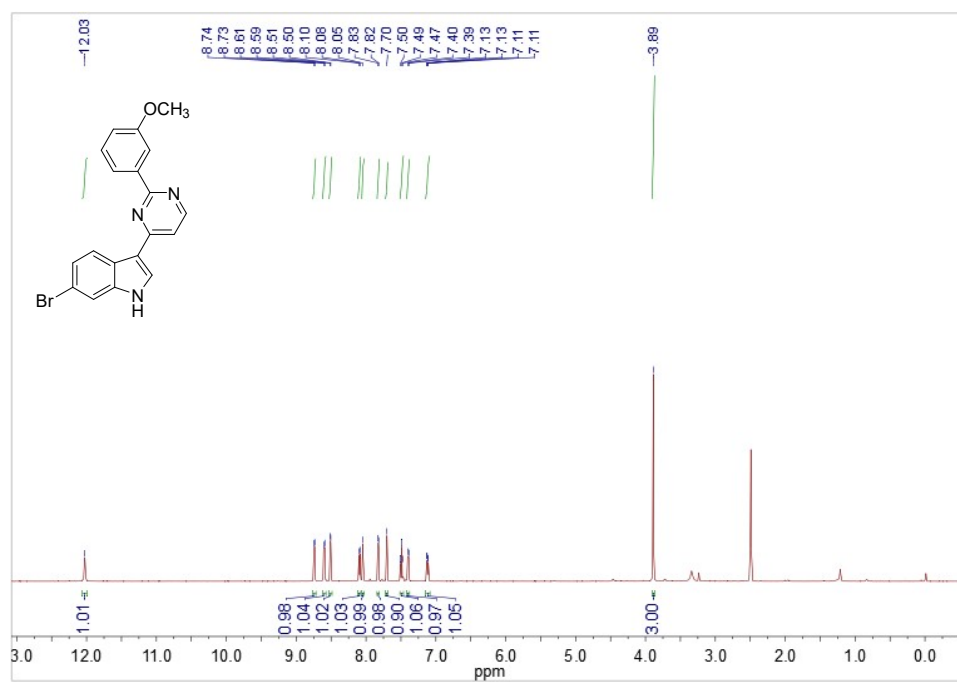

<sup>1</sup>H NMR Spectrum of **4c**

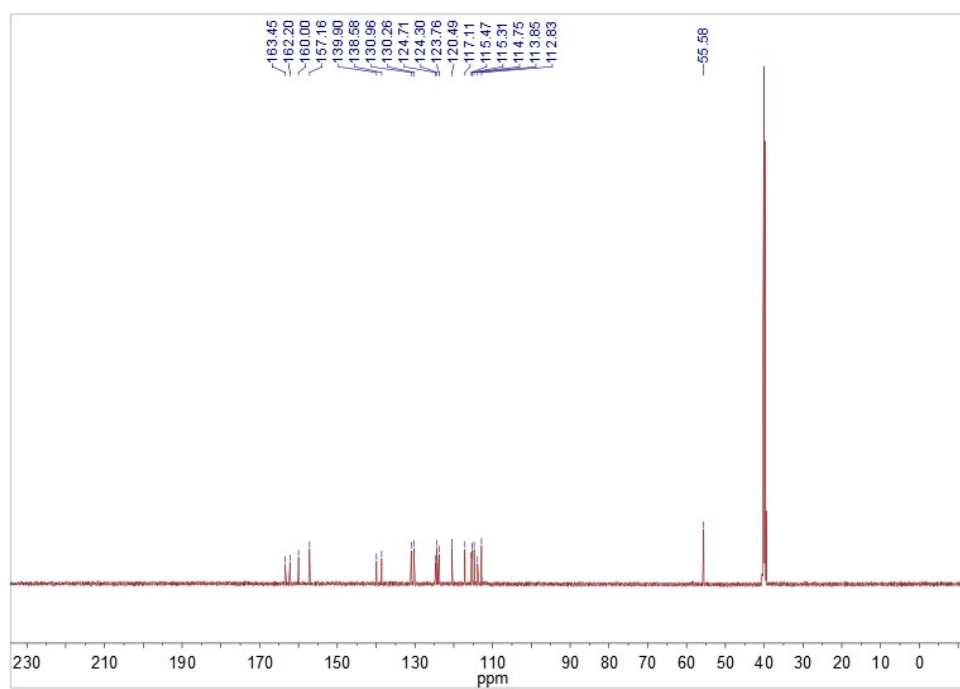

<sup>13</sup>C NMR Spectrum of **4c**

20210707-4C\_210705141924 #7 RT: 0.05 AV: 1 NL: 2.92E7  
T: FTMS + c ESI Full ms [150.00-2000.00]

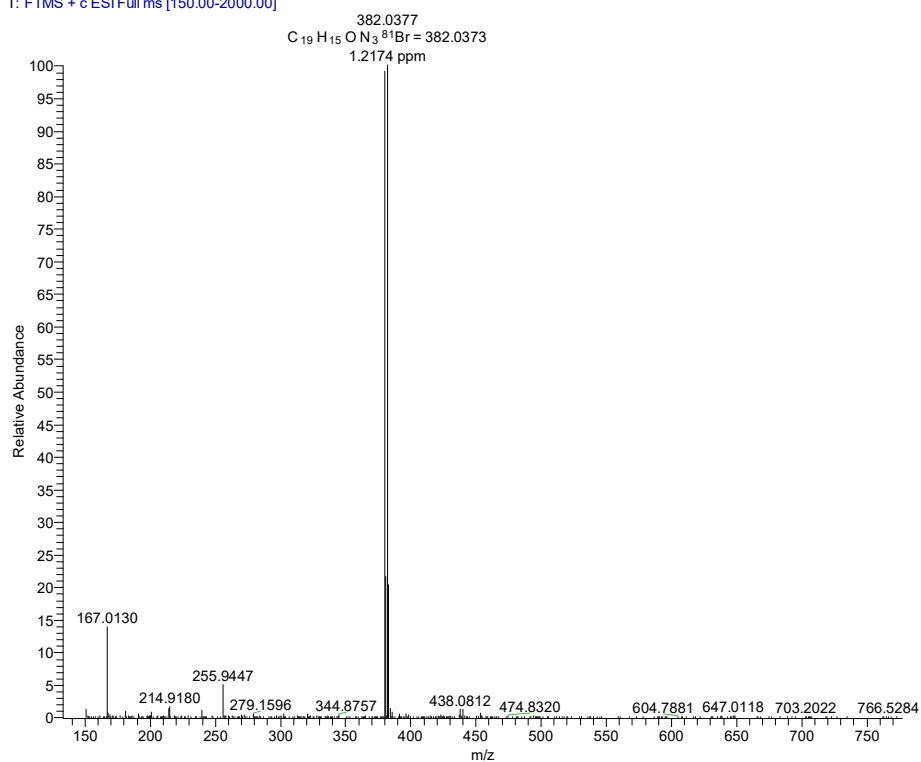

HRMS spectrum of **4c**

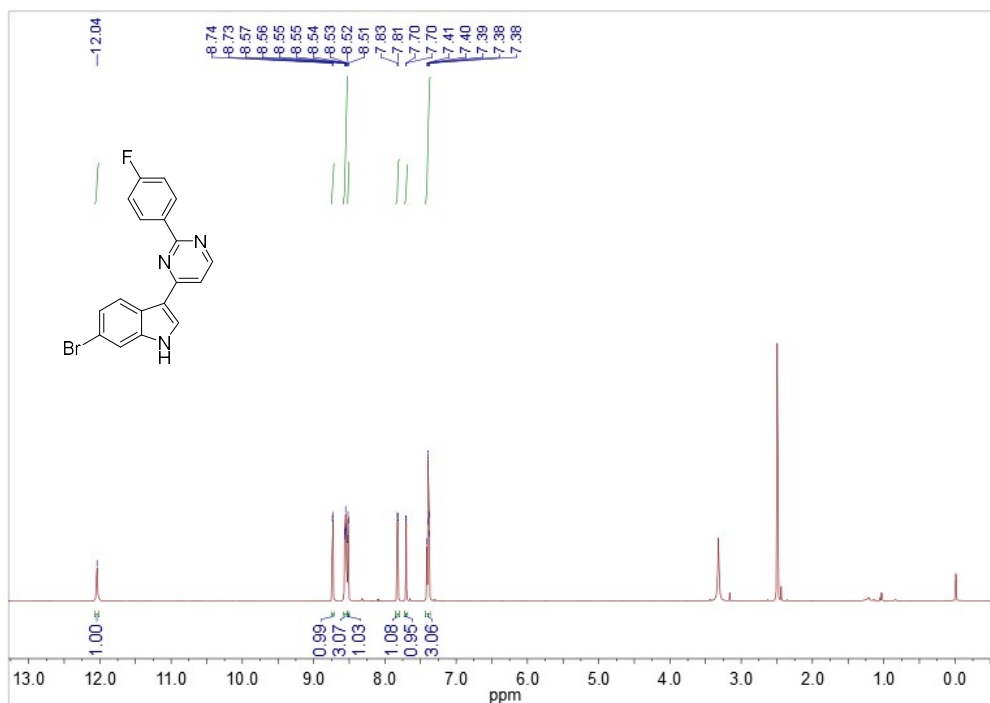

<sup>1</sup>H NMR Spectrum of **4d**

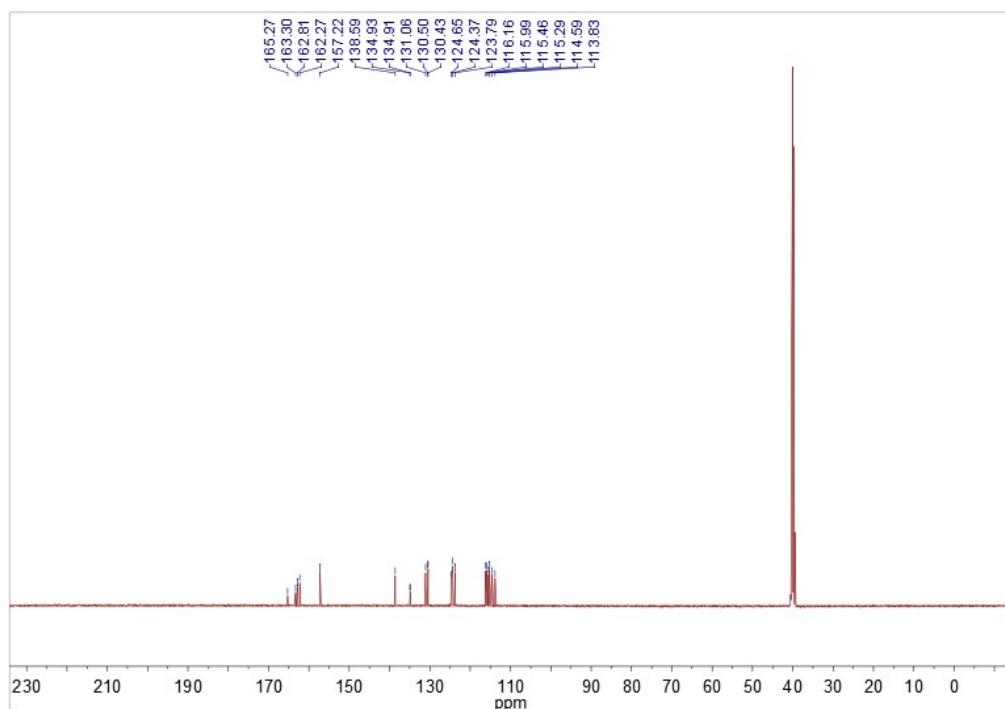

$^{13}\text{C}$  NMR Spectrum of **4d**

20180305-DXY-3c\_180306100350 #30 RT: 0.23 AV: 1 NL: 9.61E7  
T: FTMS + p ESI Full ms [100.00-1000.00]

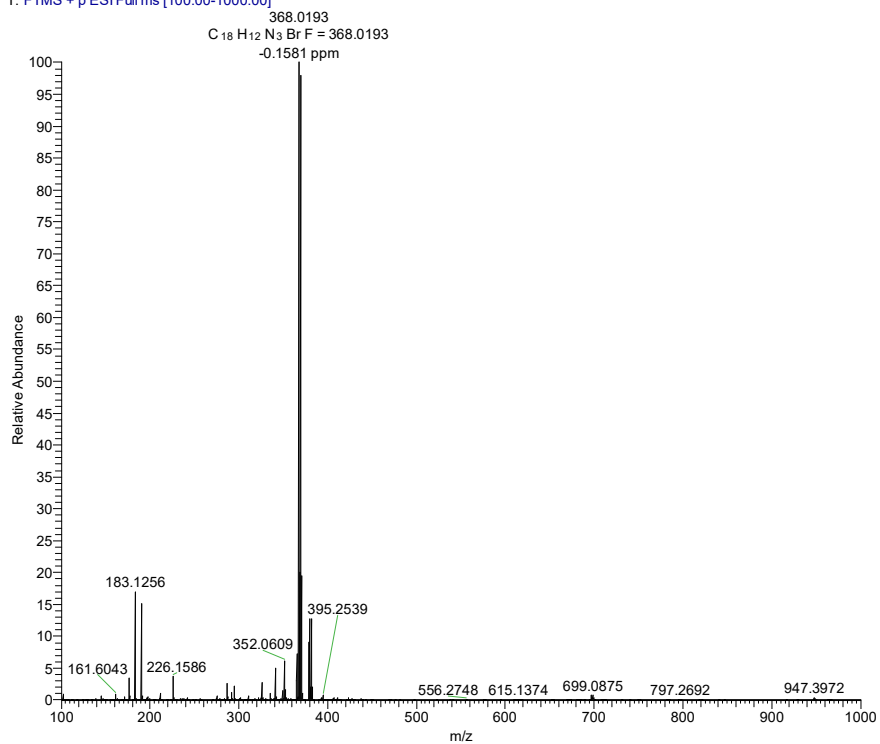

HRMS spectrum of **4d**

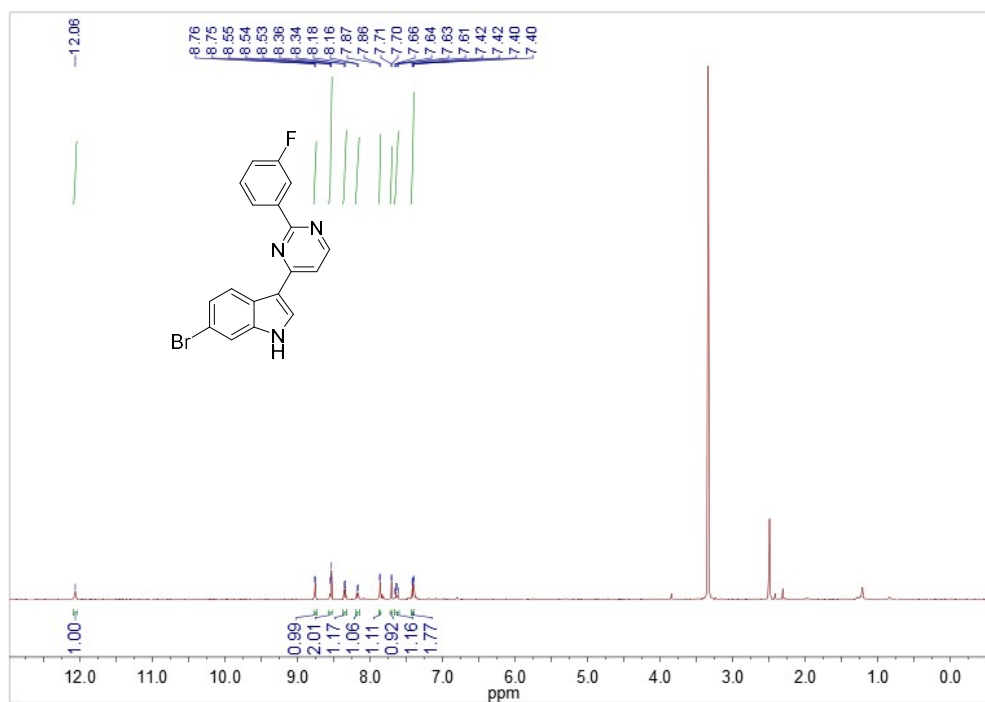

<sup>1</sup>H NMR Spectrum of **4e**

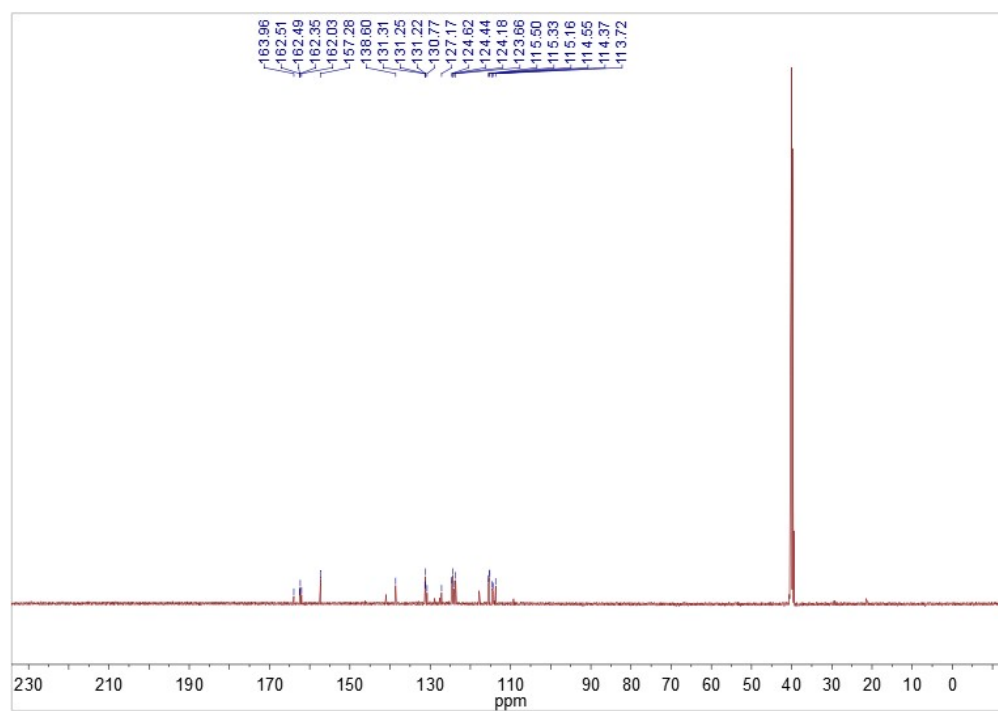

<sup>13</sup>C NMR Spectrum of **4e**

20180305-DXY-3d\_180306100350 #22 RT: 0.17 AV: 1 NL: 8.66E7  
T: FTMS + p ESI Full ms [100.00-1000.00]

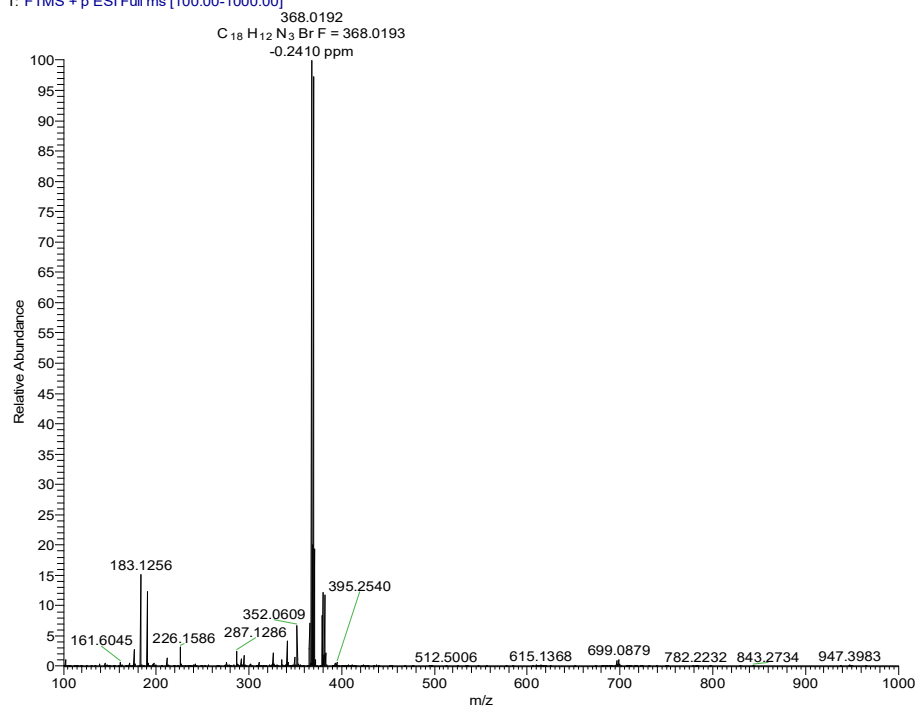

HRMS spectrum of **4e**

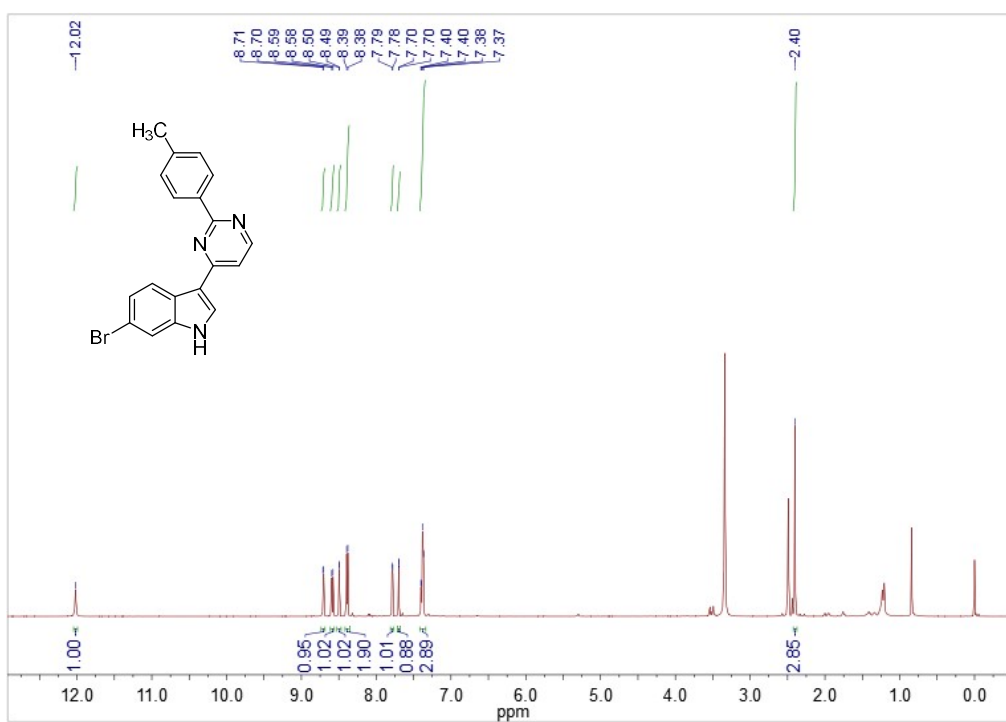

<sup>1</sup>H NMR Spectrum of **4f**



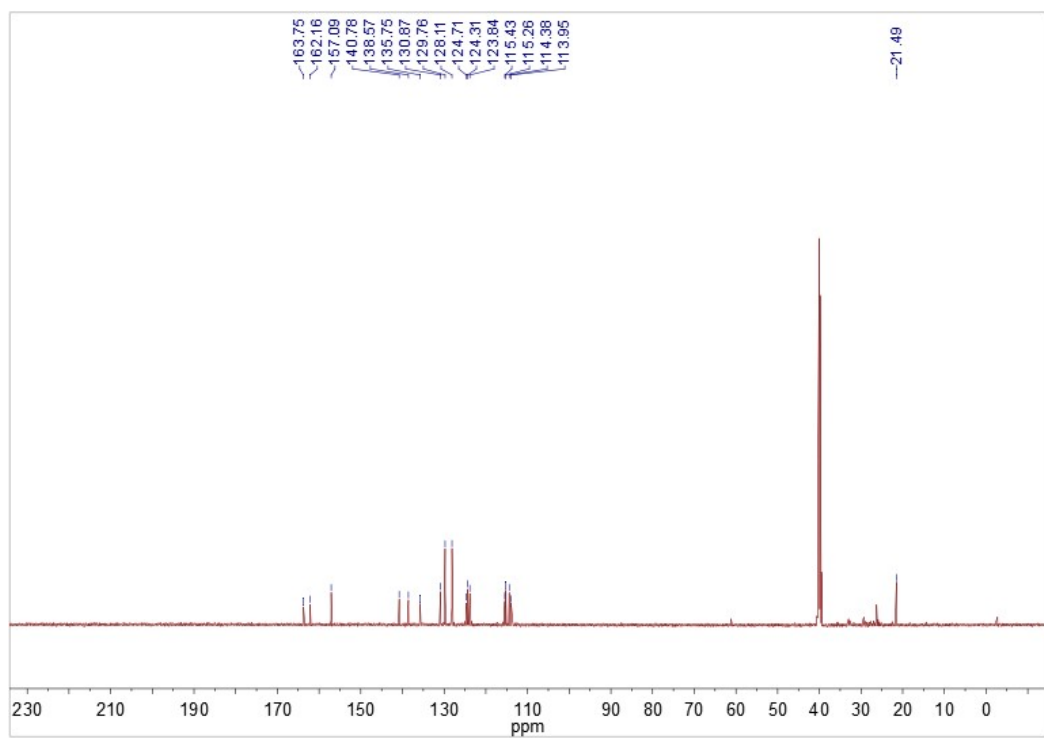

$^{13}\text{C}$  NMR Spectrum of **4f**

20180305-DXY-3e\_180306100350 #139 RT: 1.09 AV: 1 NL: 2.13E8  
T: FTMS + p ESI Full ms [100.00-1000.00]

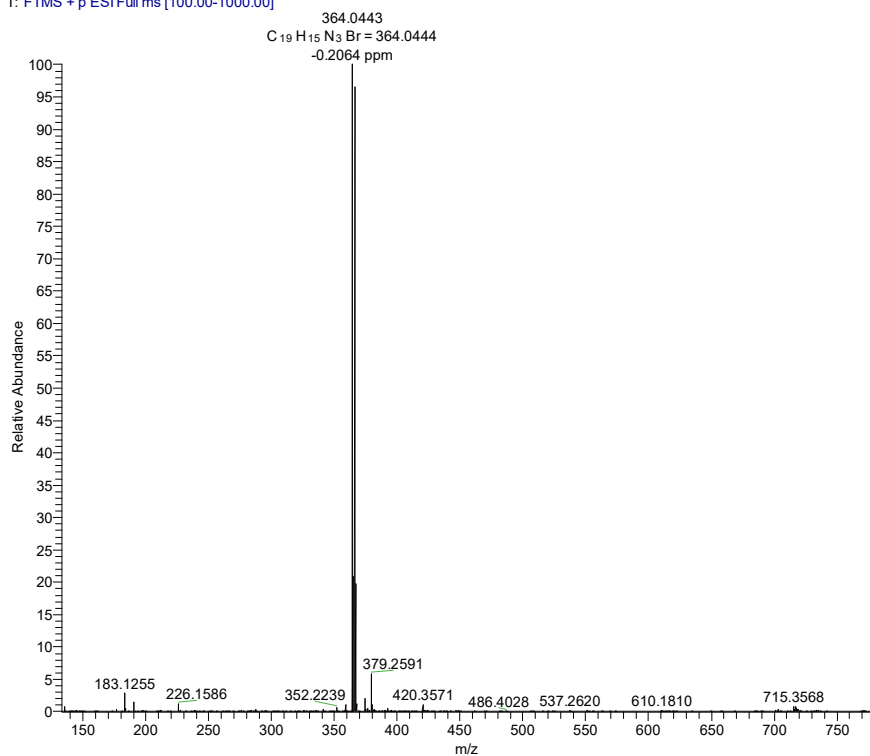

HRMS spectrum of **4f**

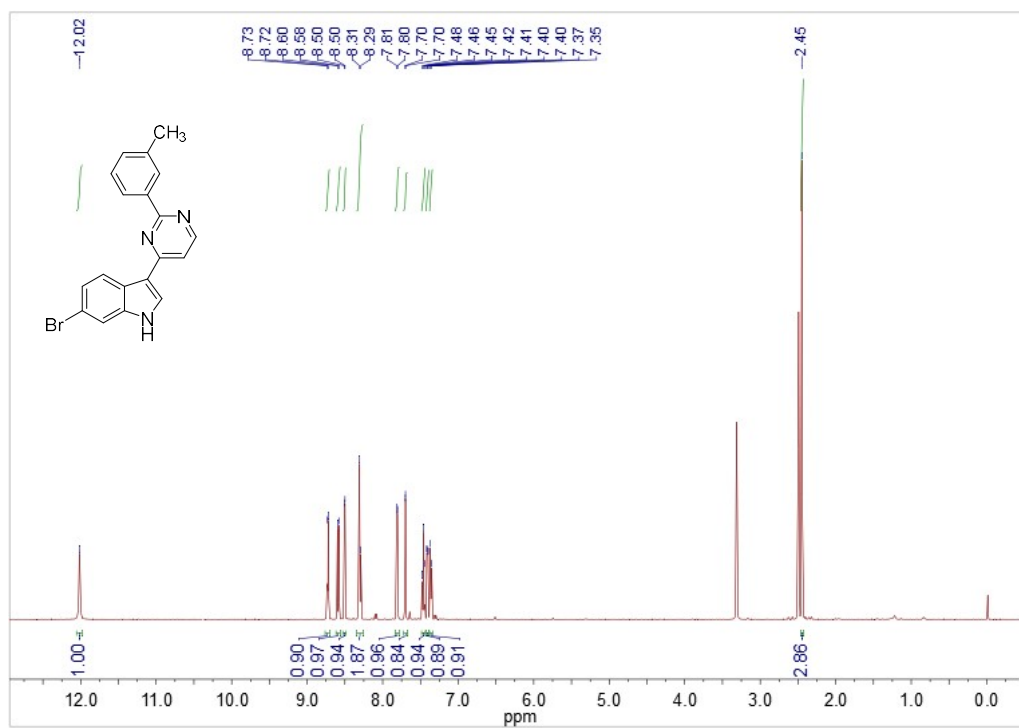

<sup>1</sup>H NMR Spectrum of **4g**

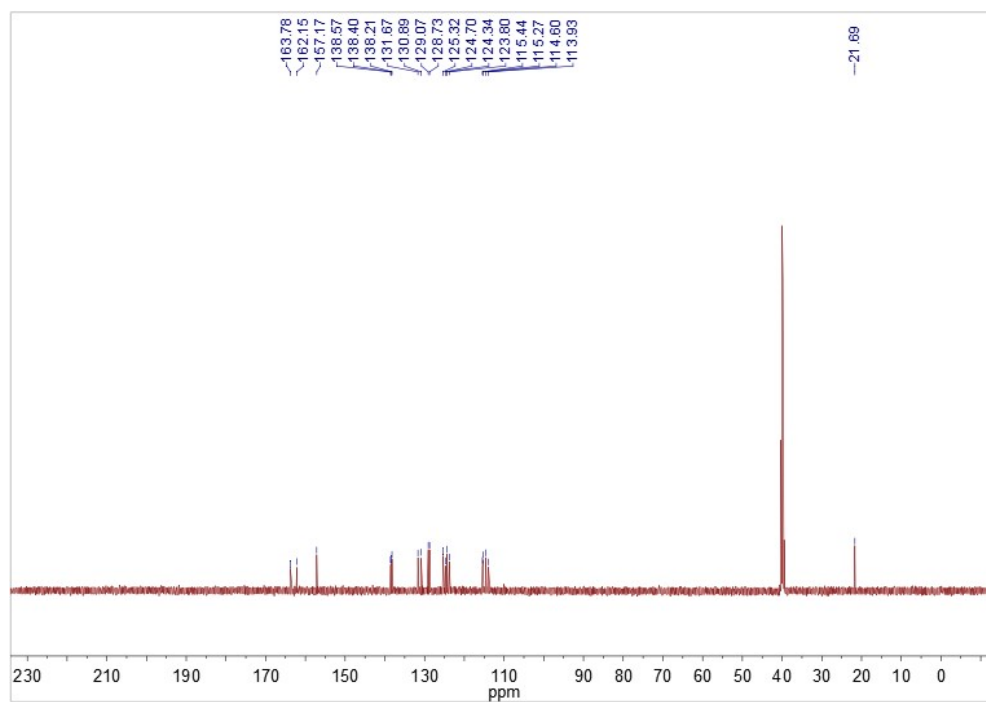

<sup>13</sup>C NMR Spectrum of **4g**

20180305-DXY-3f\_180306100350 #27 RT: 0.21 AV: 1 NL: 2.06E8  
T: FTMS + p ESI Full ms [100.00-1000.00]

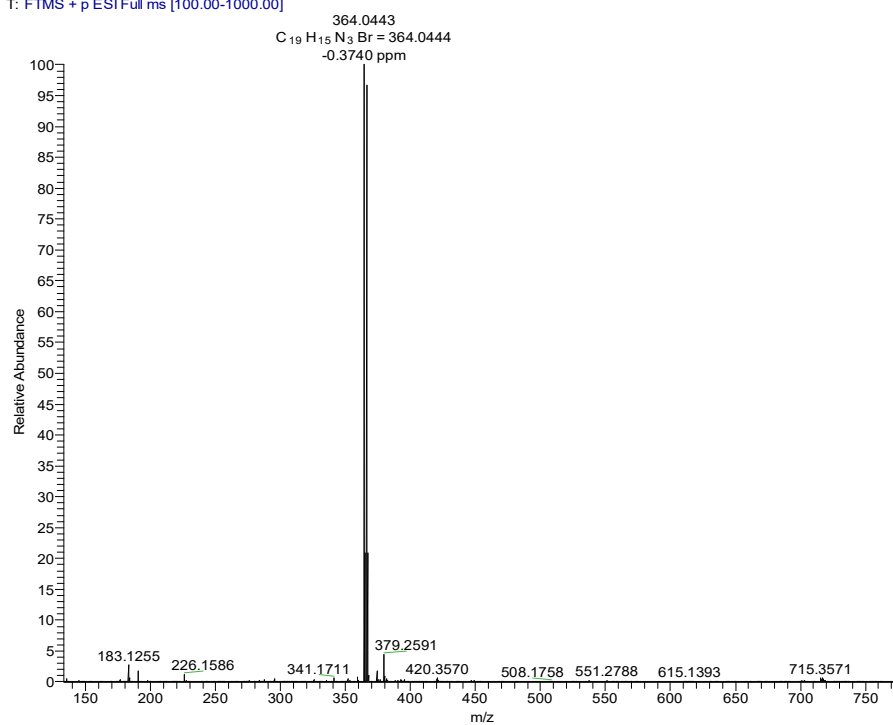

HRMS spectrum of **4g**

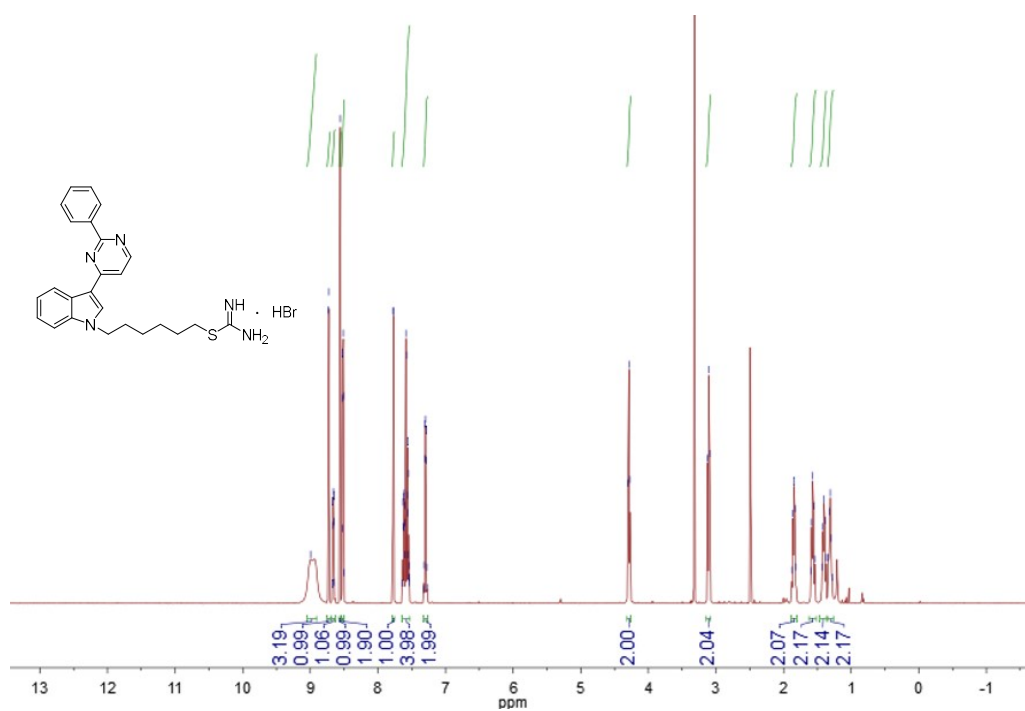

<sup>1</sup>H NMR Spectrum of **5a**

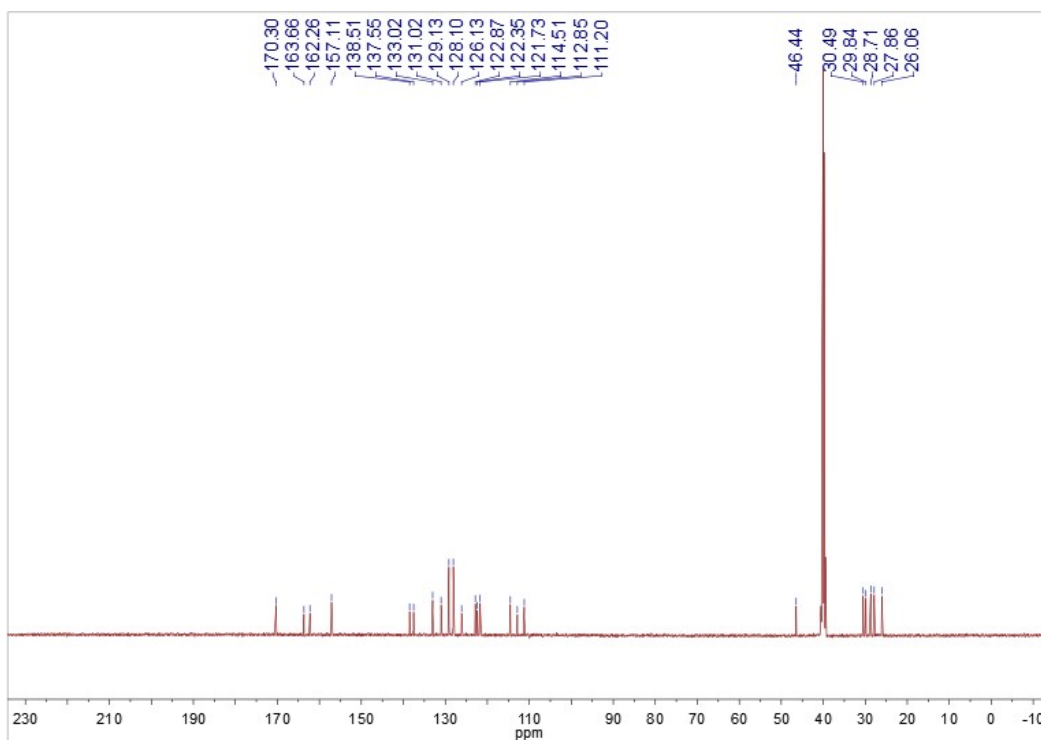

<sup>13</sup>C NMR Spectrum of **5a**

20210906-5a\_210831093738 #72 RT: 0.58 AV: 1 NL: 2.67E8  
T: FTMS + p ESI Full ms [100.00-1500.00]

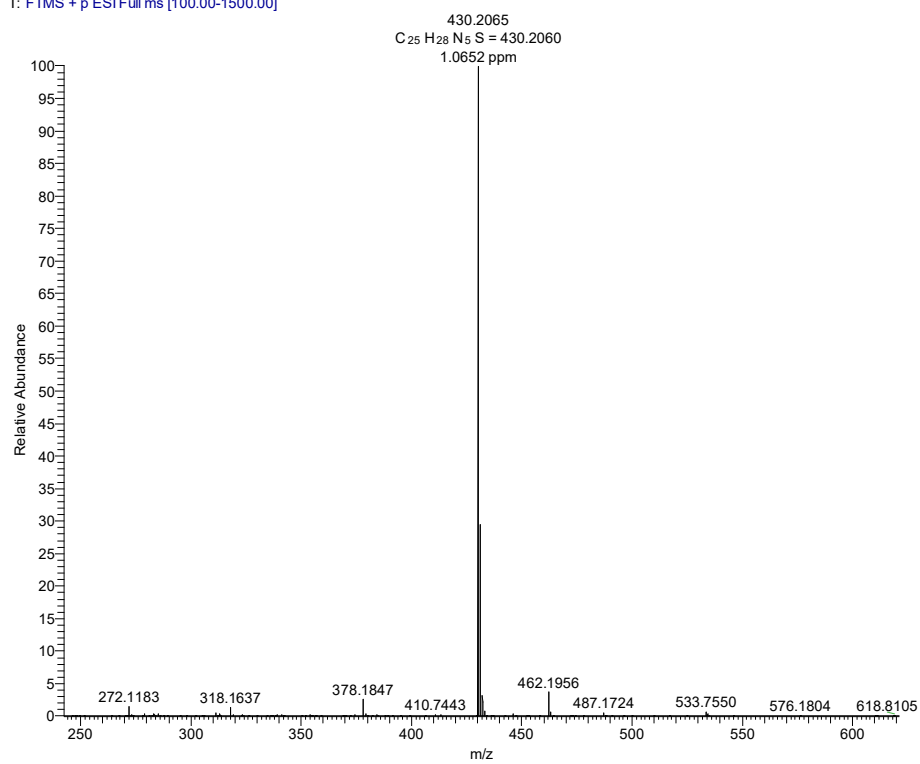

HRMS spectrum of **5a**

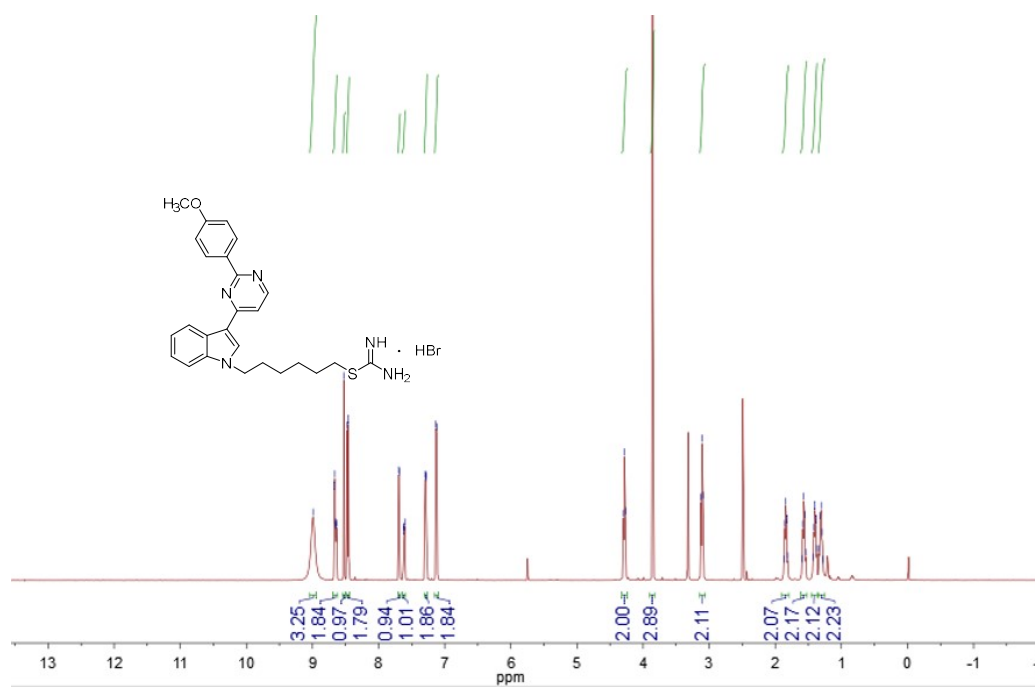

<sup>1</sup>H NMR Spectrum of **5b**

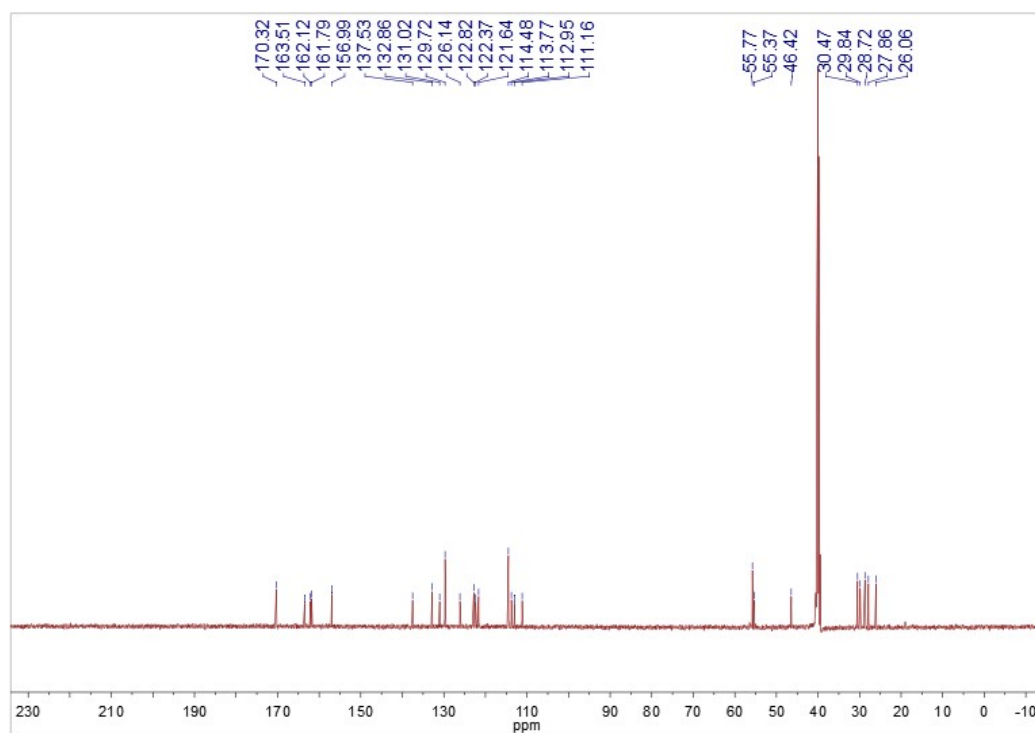

<sup>13</sup>C NMR Spectrum of **5b**

20210707-5B\_210707085046 #52 RT: 0.42 AV: 1 NL: 1.84E8  
T: FTMS + c ESI Full ms [150.00-2000.00]

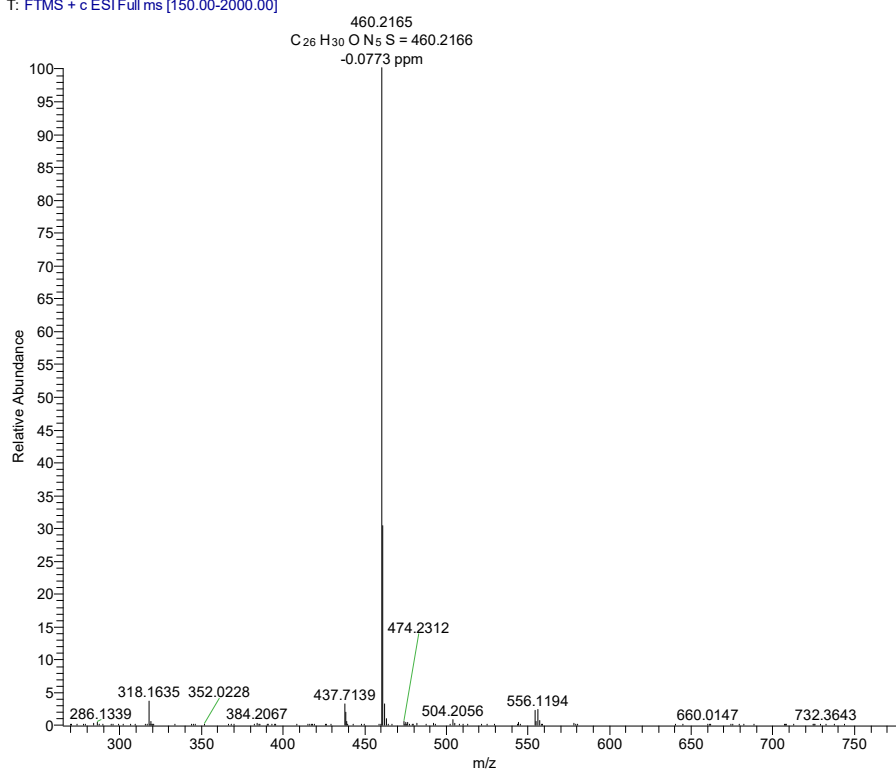

HRMS spectrum of **5b**

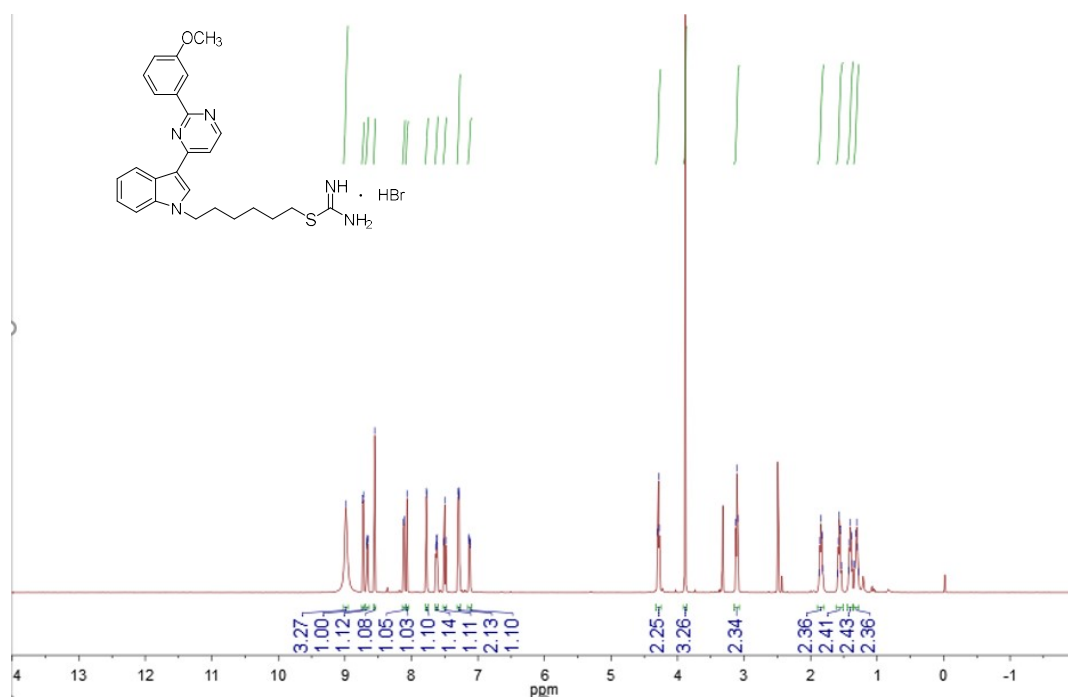

<sup>1</sup>H NMR Spectrum of **5c**

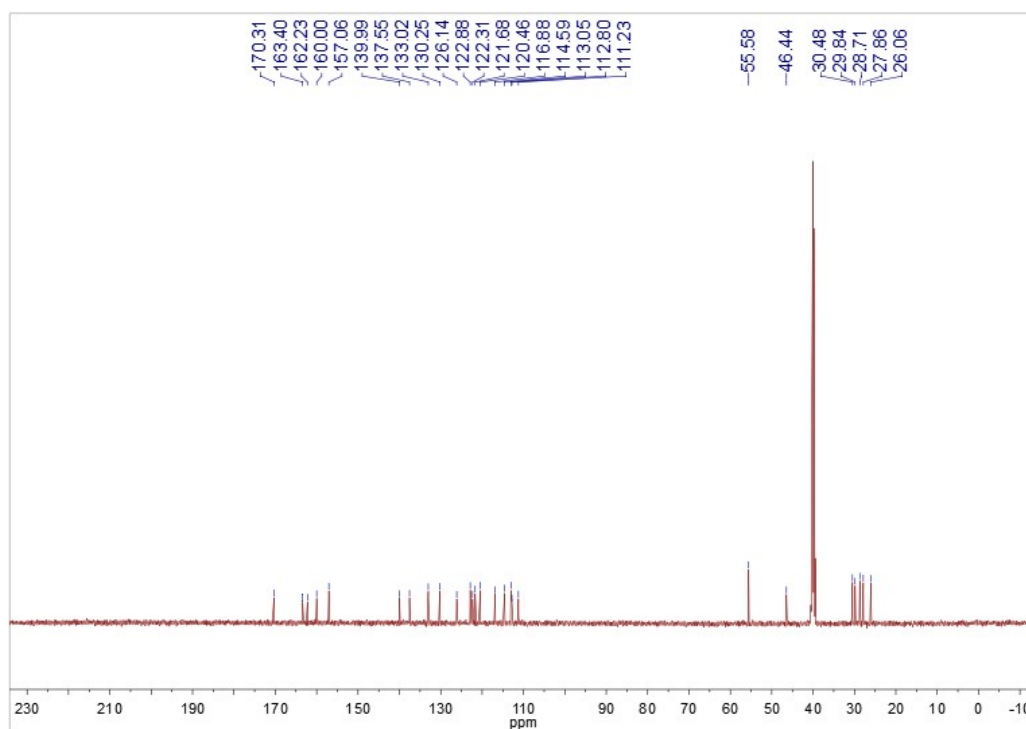

$^{13}\text{C}$  NMR Spectrum of **5c**

20210707-5C 210707085046 #2 RT: 0.01 AV: 1 NL: 2.31E8  
T: FTMS + c ESI Full ms [150.00-2000.00]

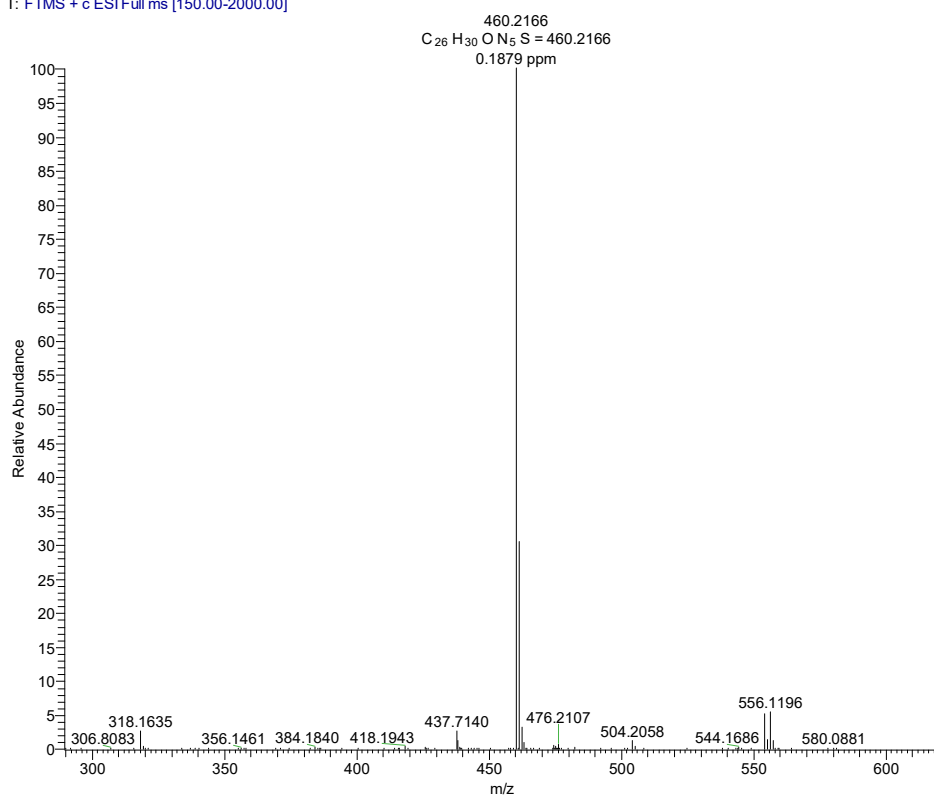

HRMS spectrum of **5c**

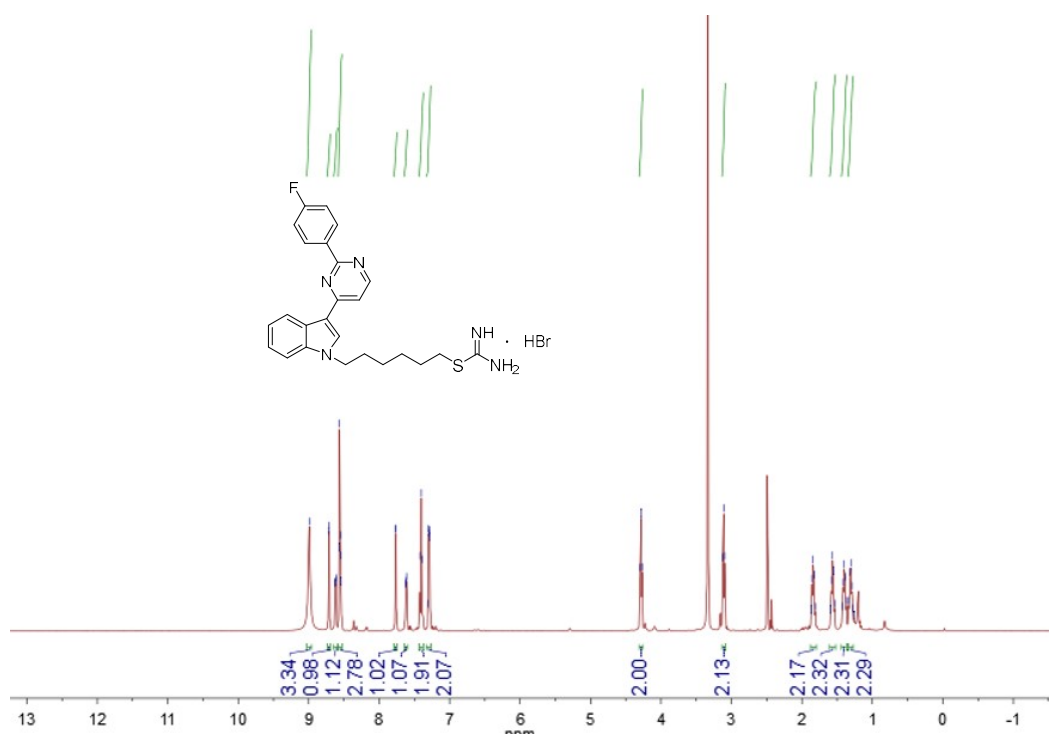

<sup>1</sup>H NMR Spectrum of **5d**

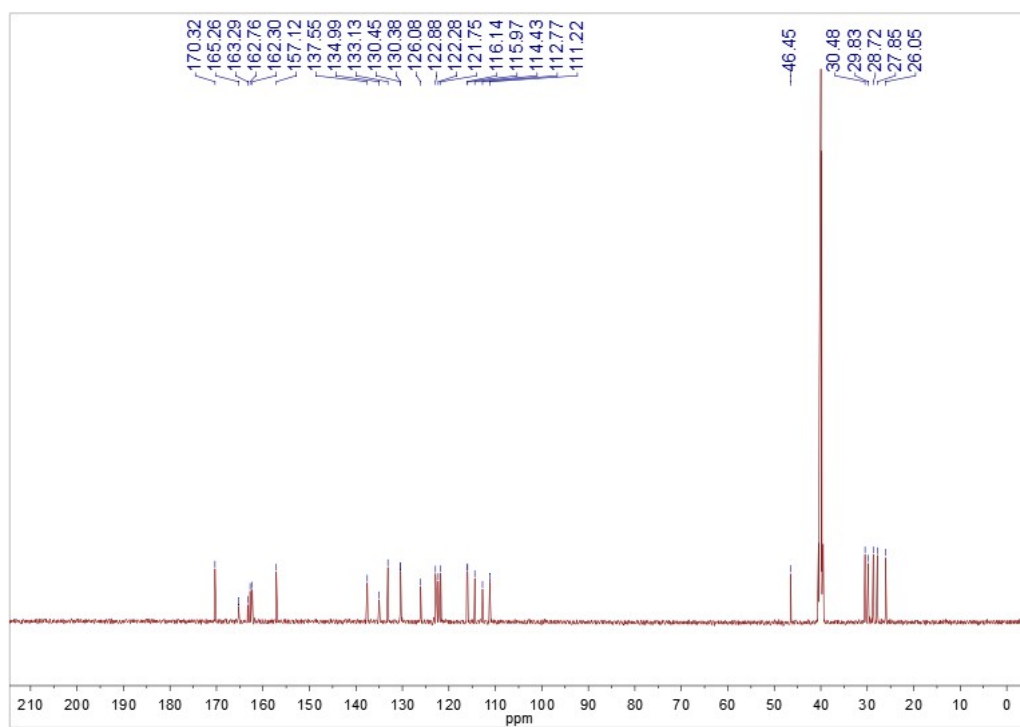

<sup>13</sup>C NMR Spectrum of **5d**



20210707-5D\_210707085046 #30 RT: 0.23 AV: 1 NL: 3.41E8  
T: FTMS + c ESI Full ms [150.00-2000.00]

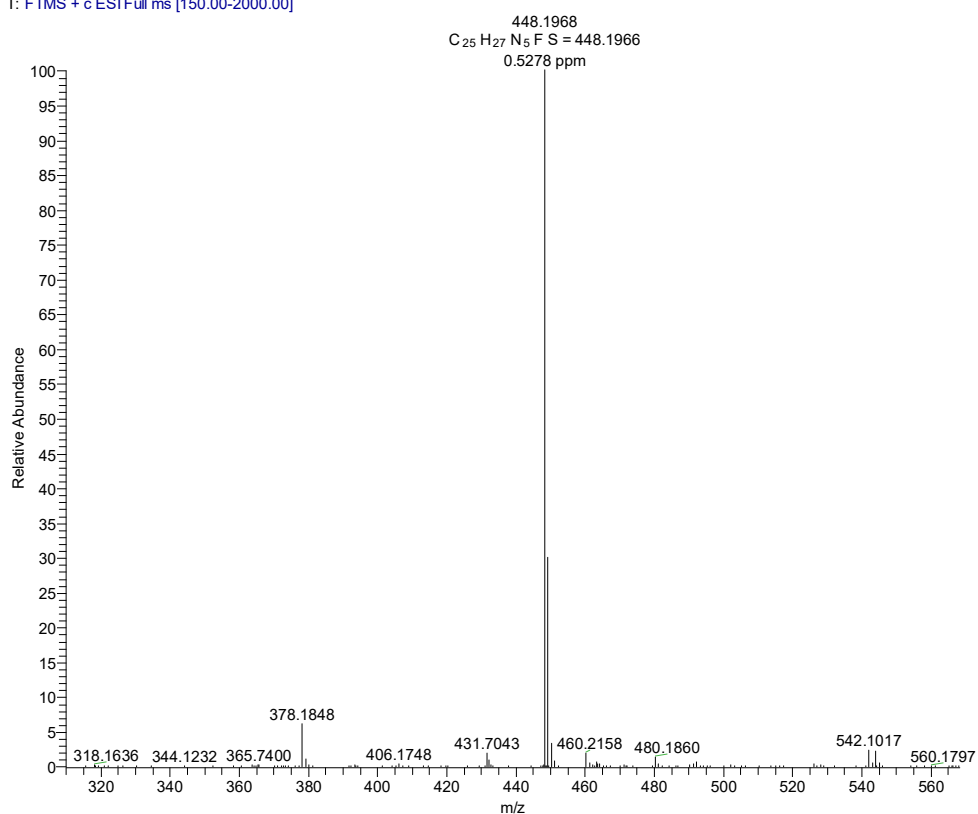

HRMS spectrum of **5d**

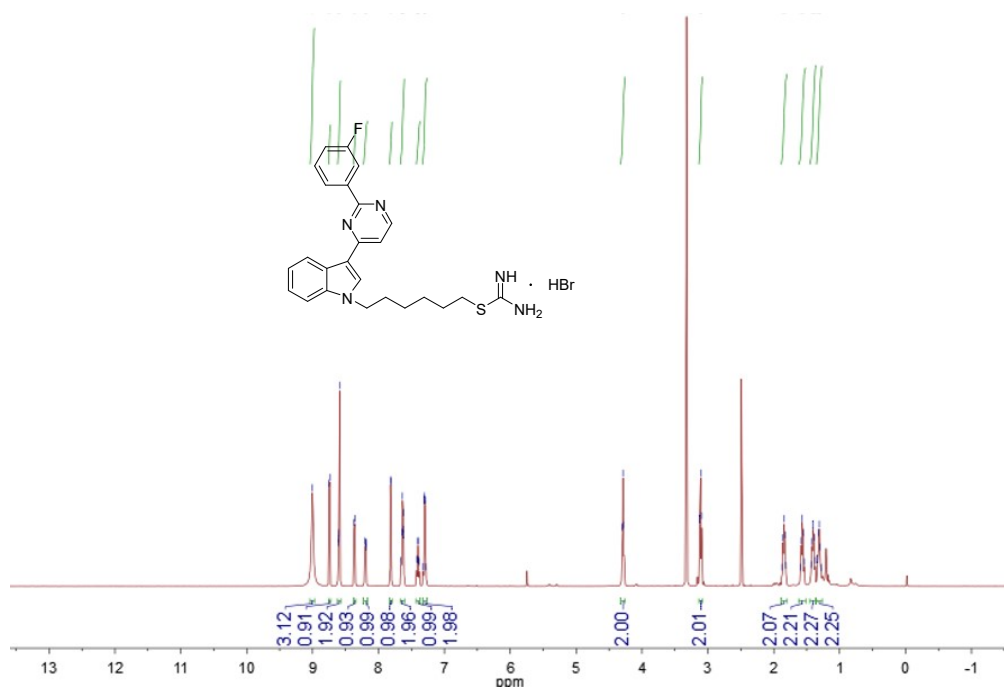

<sup>1</sup>H NMR Spectrum of **5e**

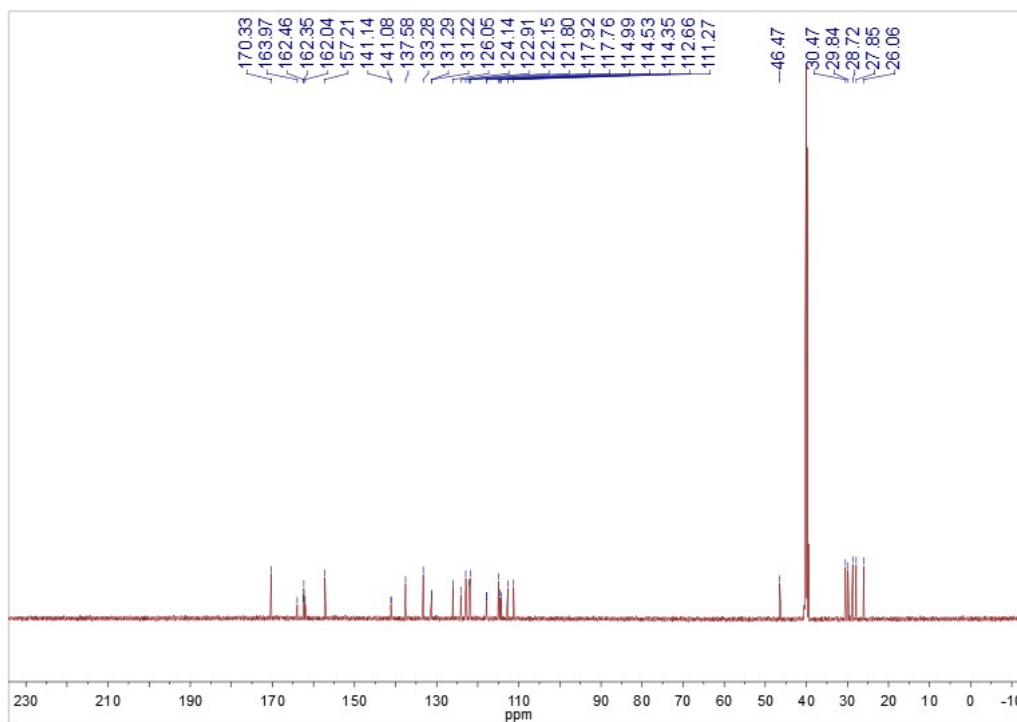

<sup>13</sup>C NMR Spectrum of **5e**

20210707-5E\_210707085046 #40 RT: 0.31 AV: 1 NL: 3.93E7  
T: FTMS + c ESI Full ms [150.00-2000.00]

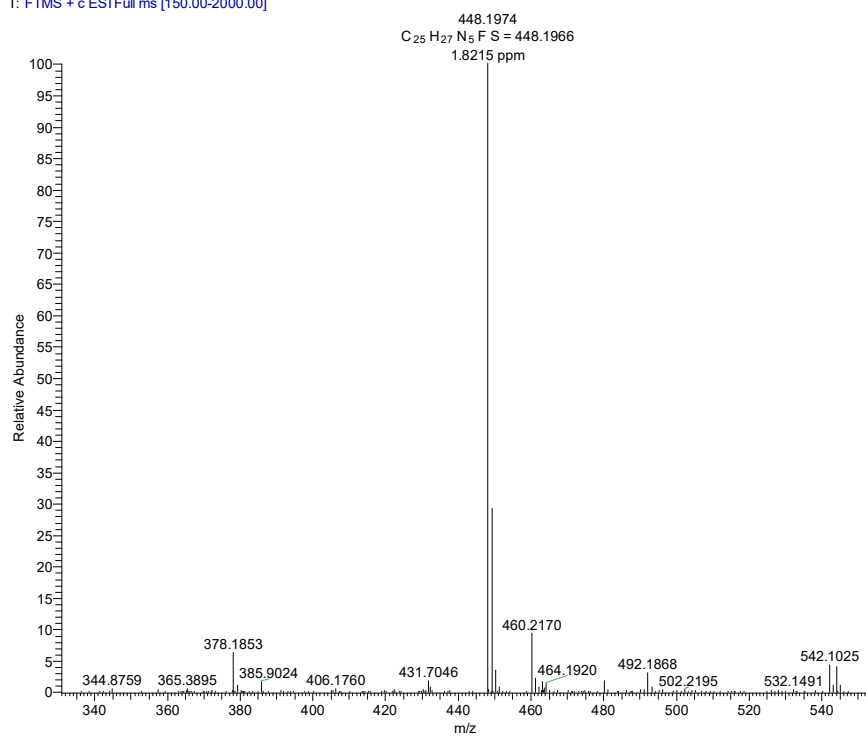

HRMS spectrum of **5e**

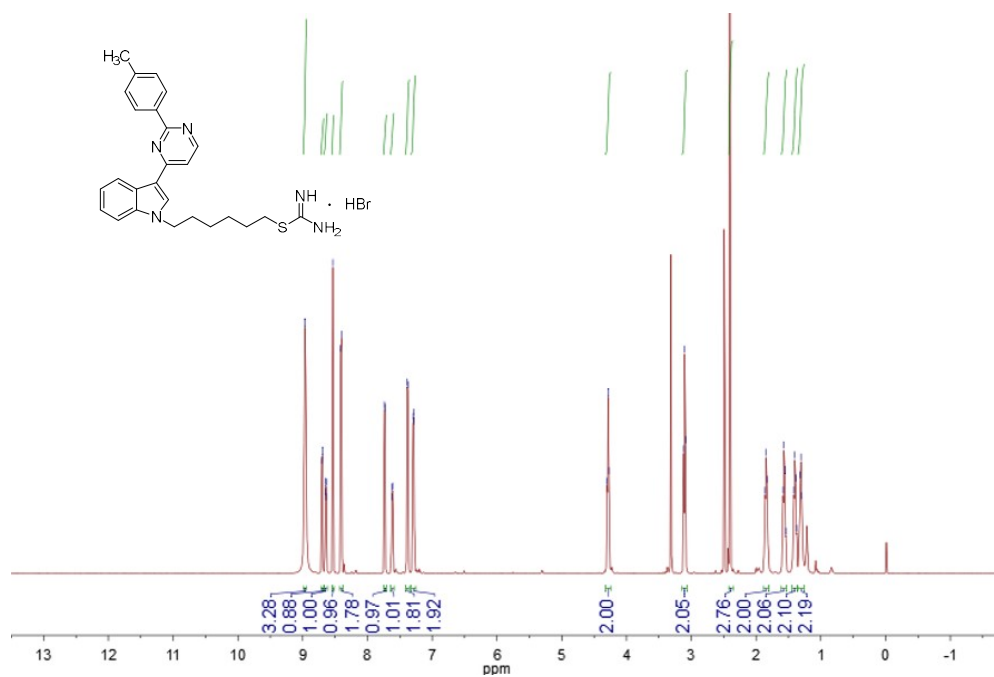

**<sup>1</sup>H NMR Spectrum of **5f****

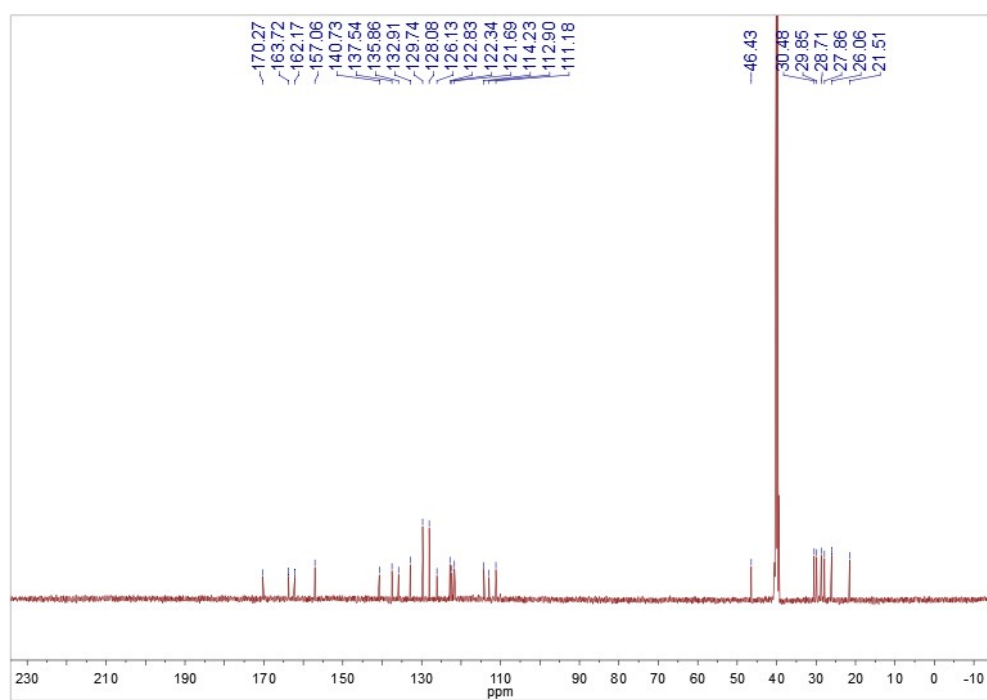

**<sup>13</sup>C NMR Spectrum of **5f****

20210707-5F\_210707085046 #28 RT: 0.22 AV: 1 NL: 1.31E7  
T: FTMS + c ESI Full ms [150.00-2000.00]

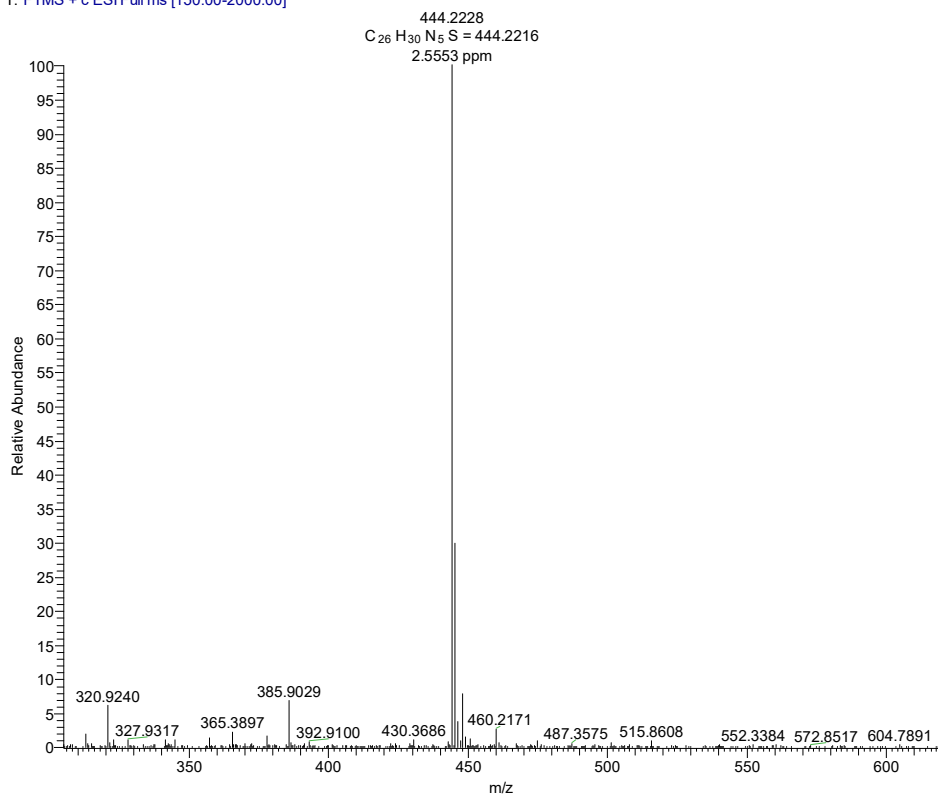

HRMS spectrum of **5f**

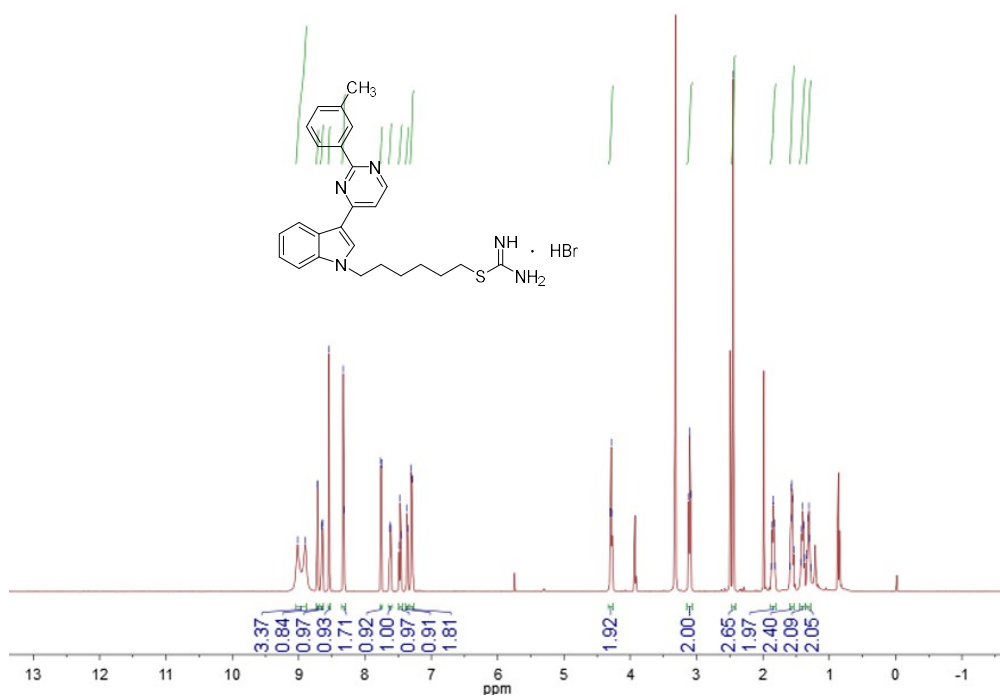

<sup>1</sup>H NMR Spectrum of **5g**

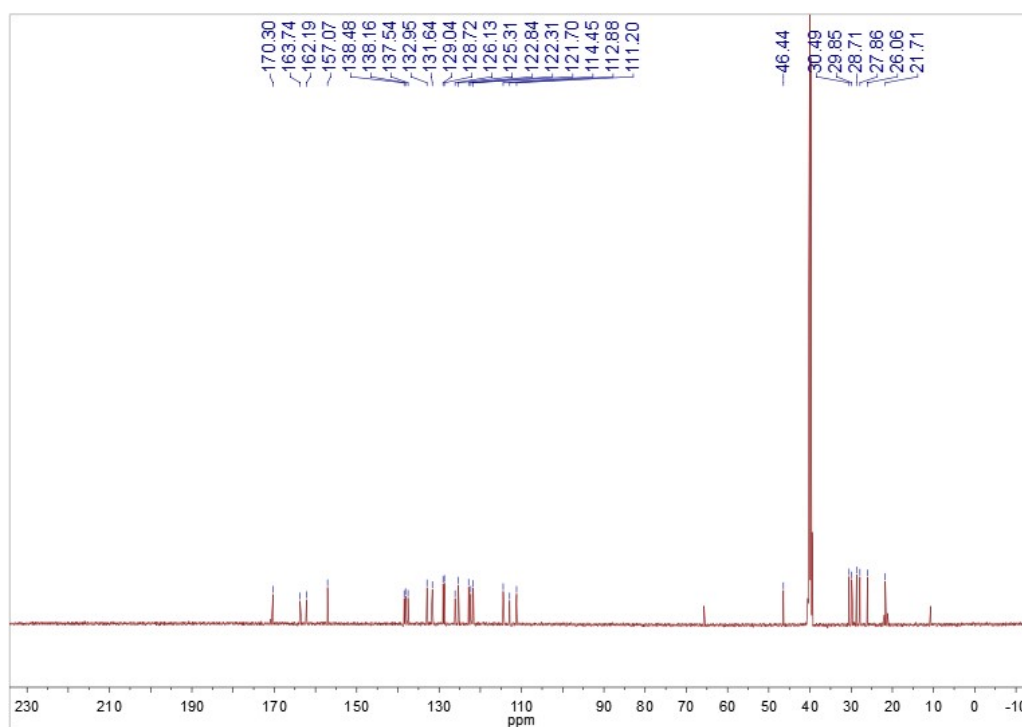

$^{13}\text{C}$  NMR Spectrum of **5g**

20210707-5G\_210707085046 #36 RT: 0.28 AV: 1 NL: 2.19E8  
T: FTMS + c ESI Full ms [150.00-2000.00]

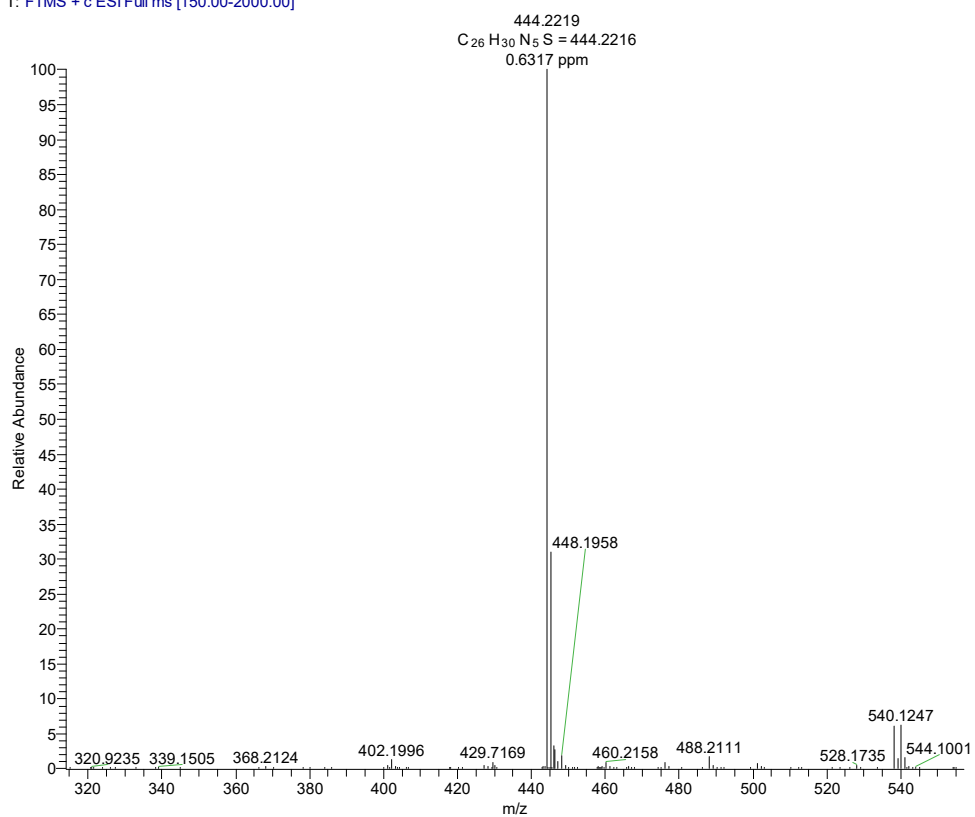

HRMS spectrum of **5g**

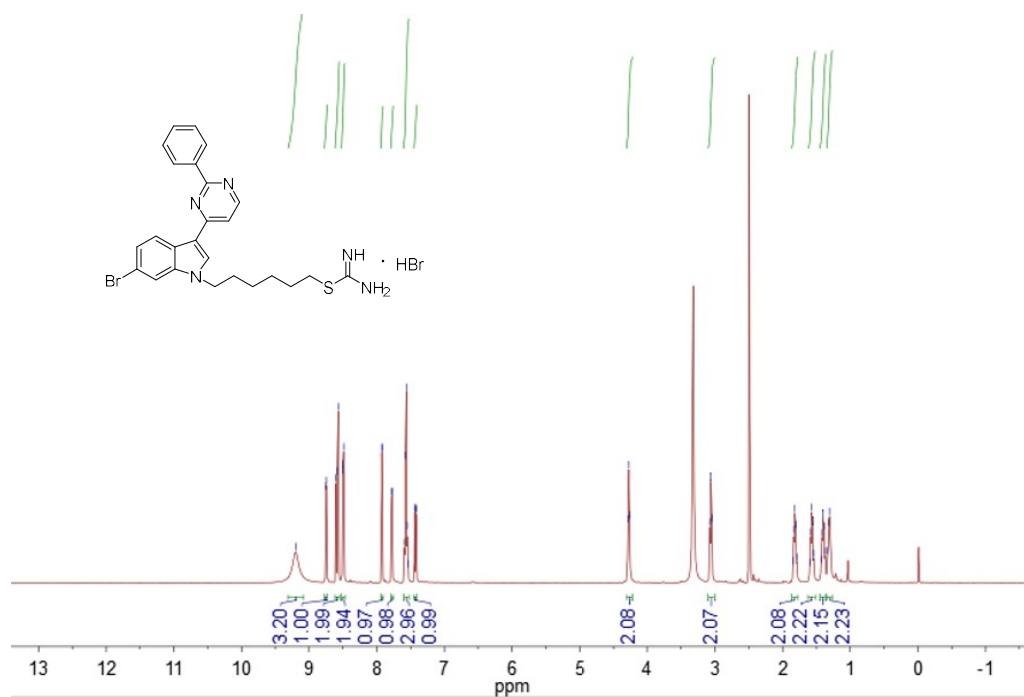

<sup>1</sup>H NMR Spectrum of **6a**

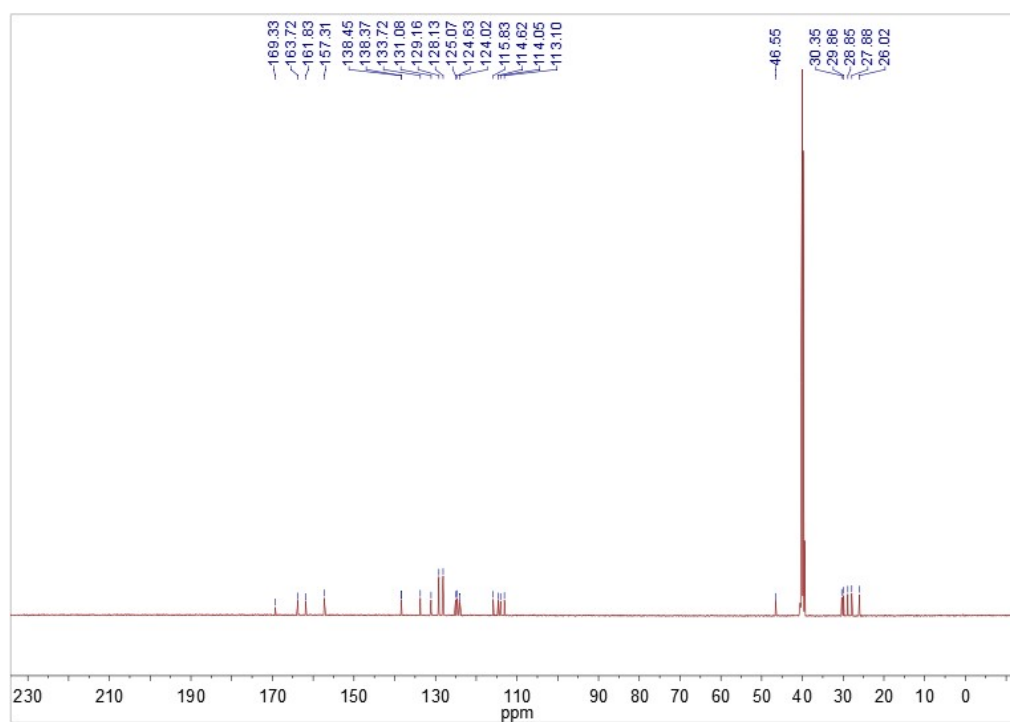

<sup>13</sup>C NMR Spectrum of **6a**

20180305-DXY-3s\_180306100350 #47 RT: 0.37 AV: 1 NL: 3.85E8  
T: FTMS + p ESI Full ms [100.00-1000.00]

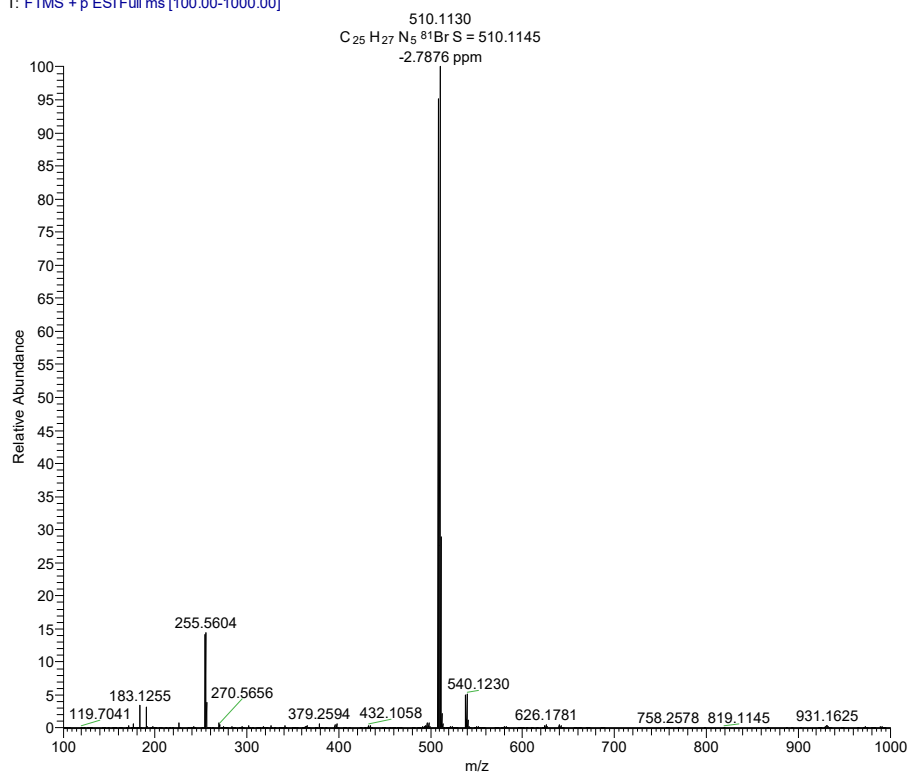

HRMS spectrum of **6a**

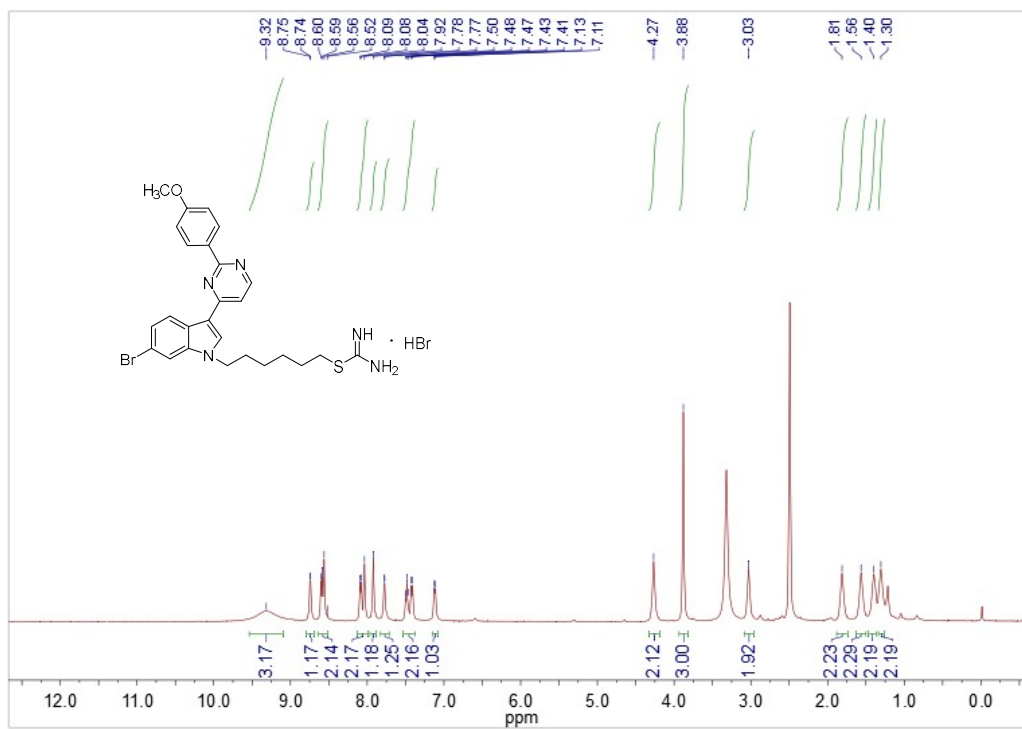

<sup>1</sup>H NMR Spectrum of **6b**

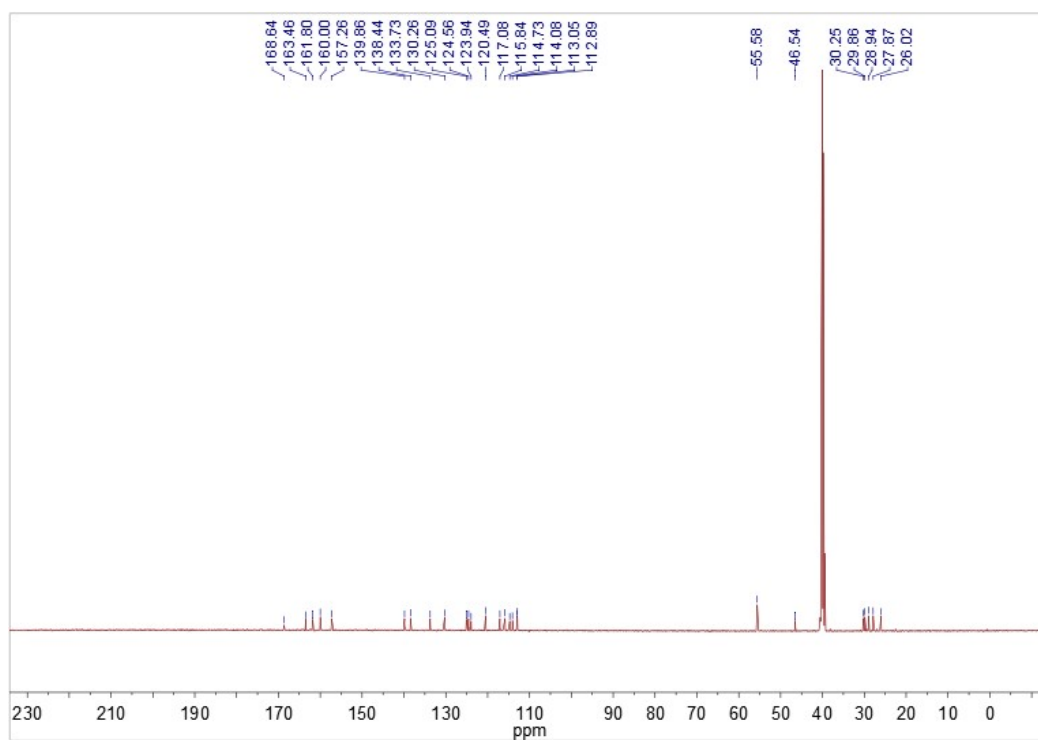

<sup>13</sup>C NMR Spectrum of **6b**

20180305-DXY-3as\_180306100350 #74 RT: 0.64 AV: 1 NL: 4.65E8  
T: FTMS + p ESI Full ms [100.00-1000.00]

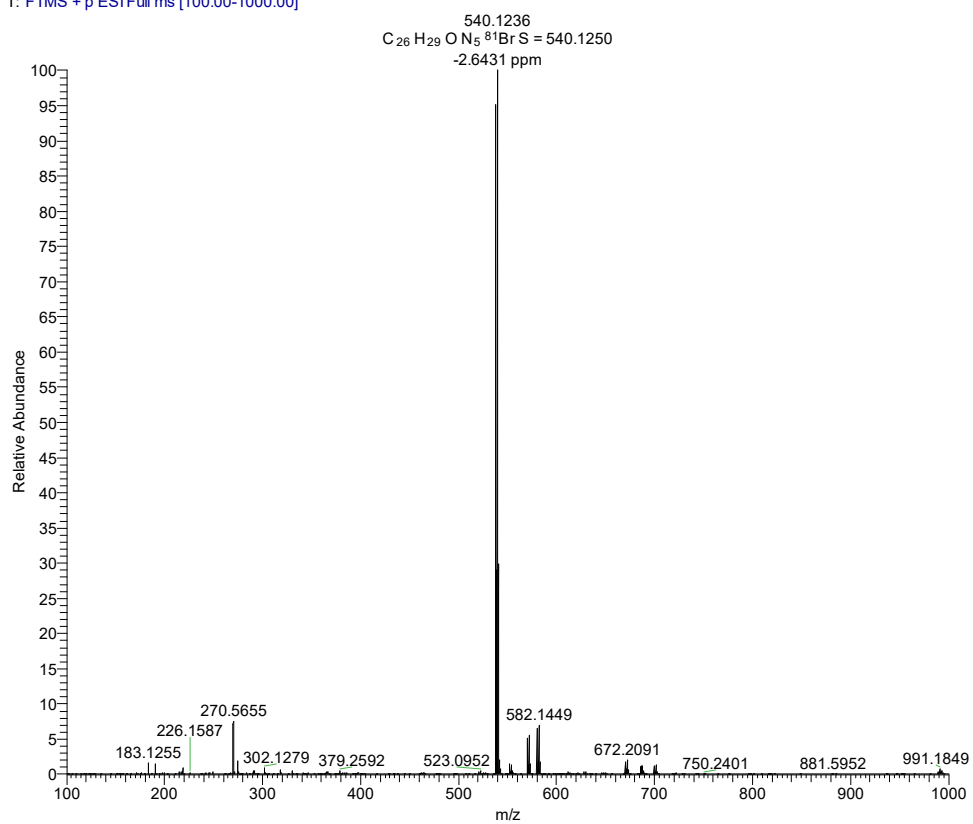

HRMS spectrum of **6b**



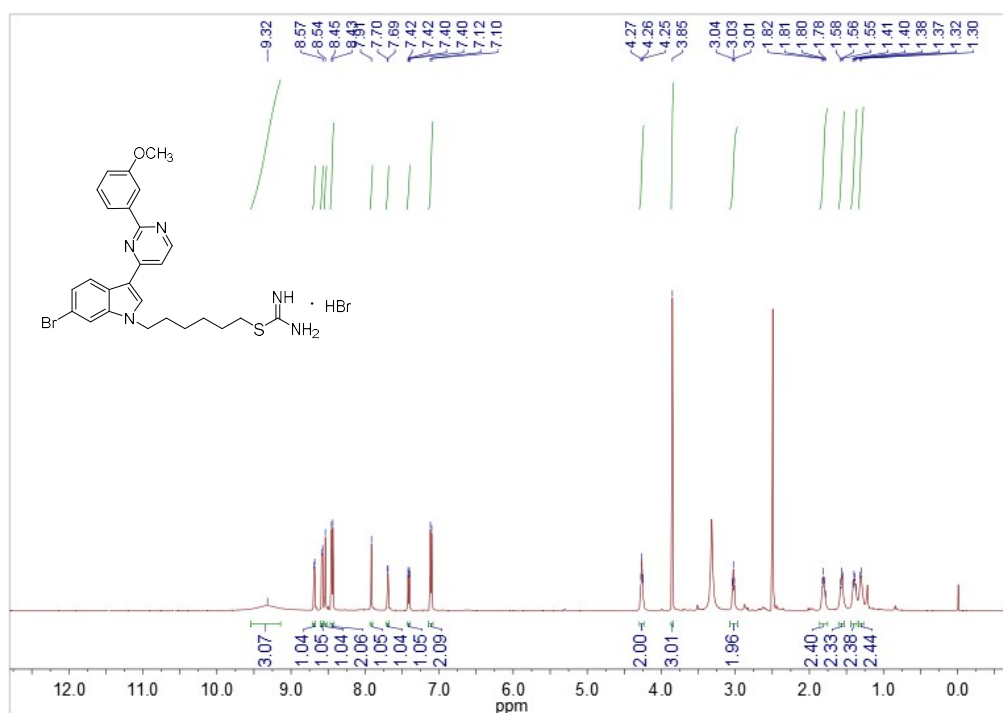

<sup>1</sup>H NMR Spectrum of 6c

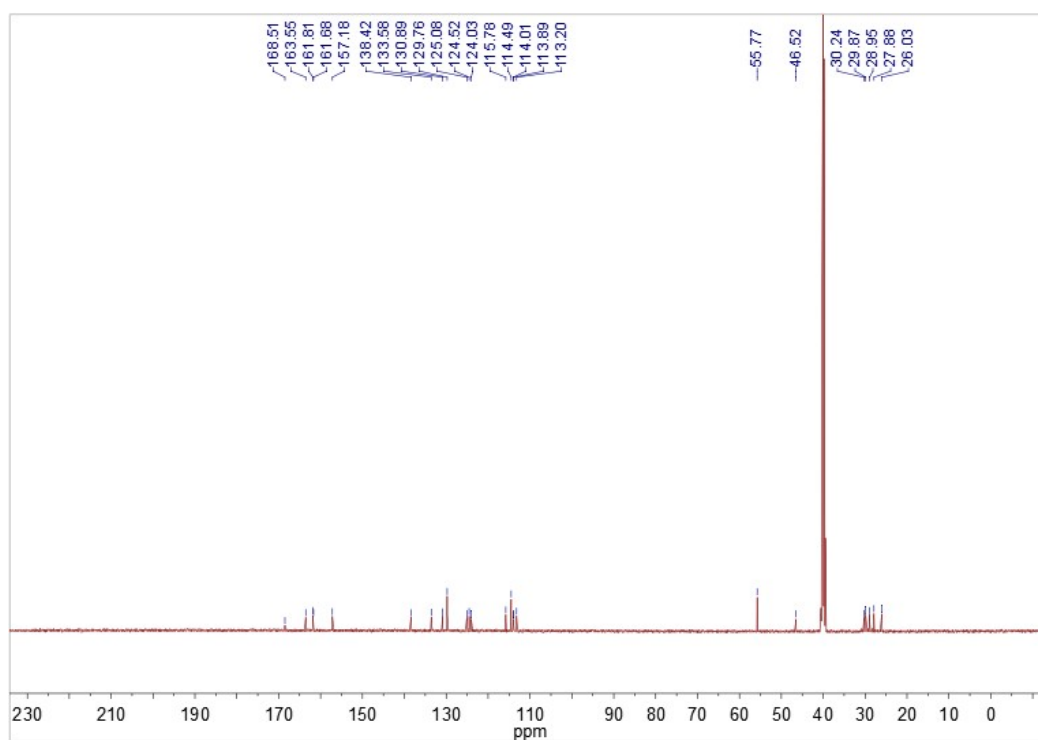

<sup>13</sup>C NMR Spectrum of 6c

20180305-DXY-3bs\_180306100350 #7 RT: 0.05 AV: 1 NL: 4.80E8  
T: FTMS + p ESI Full ms [100.00-1000.00]

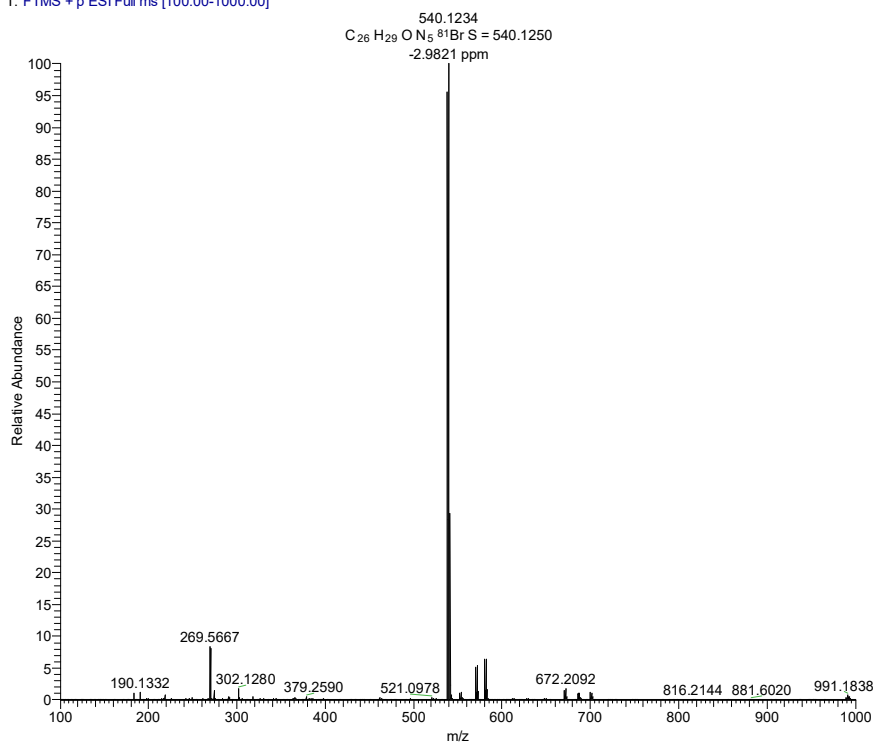

HRMS spectrum of **6c**

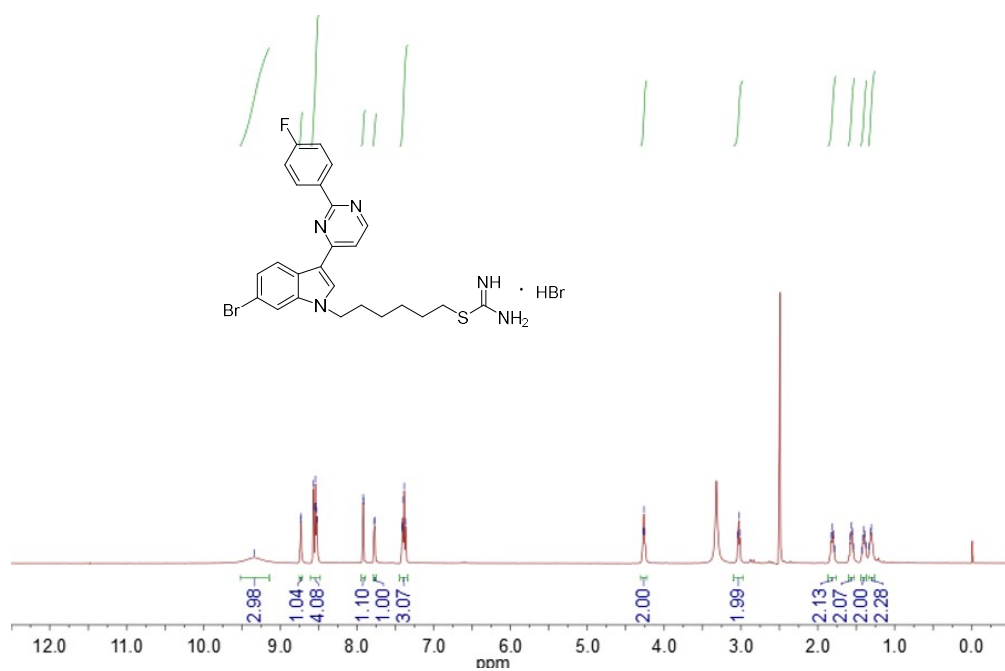

<sup>1</sup>H NMR Spectrum of **6d**

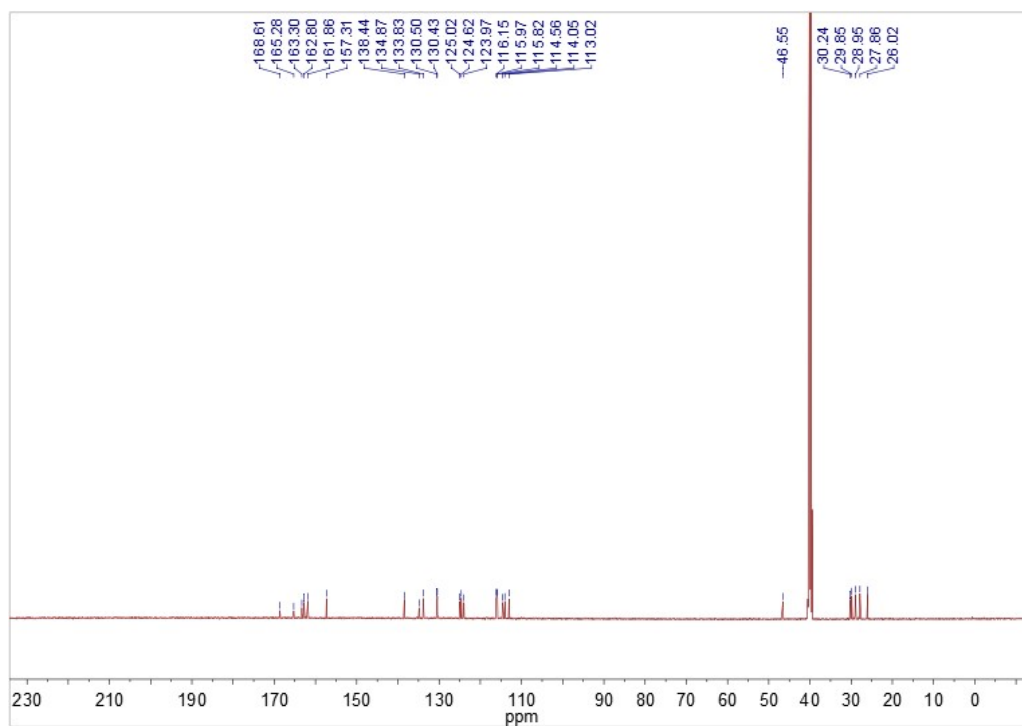

<sup>13</sup>C NMR Spectrum of **6d**

20180305-DXY-3cs\_180306100350 #14 RT: 0.10 AV: 1 NL: 2.36E8  
T: FTMS + p ESI Full ms [100.00-1000.00]

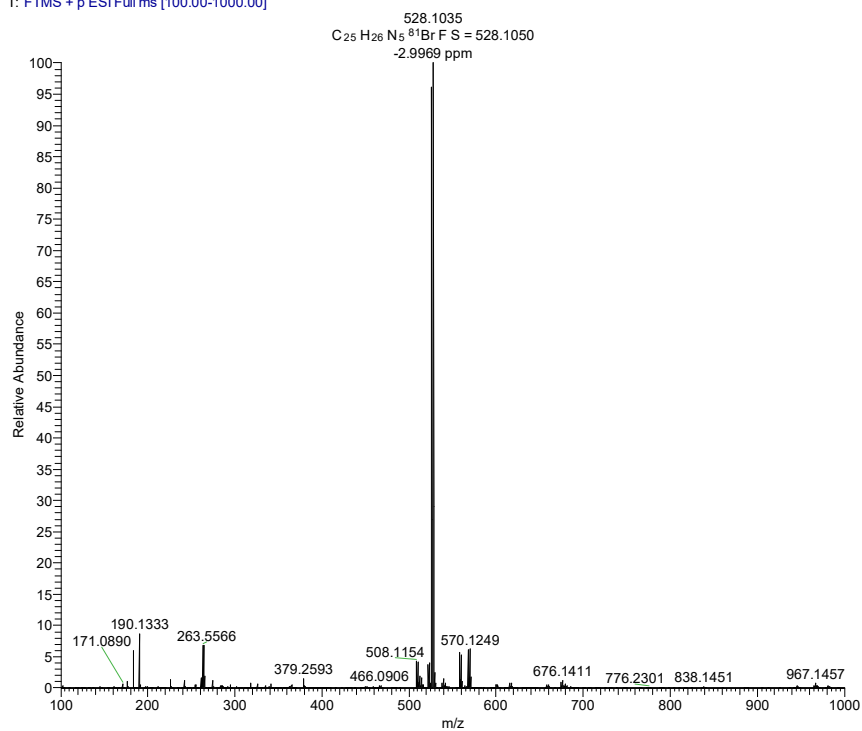

HRMS spectrum of **6d**

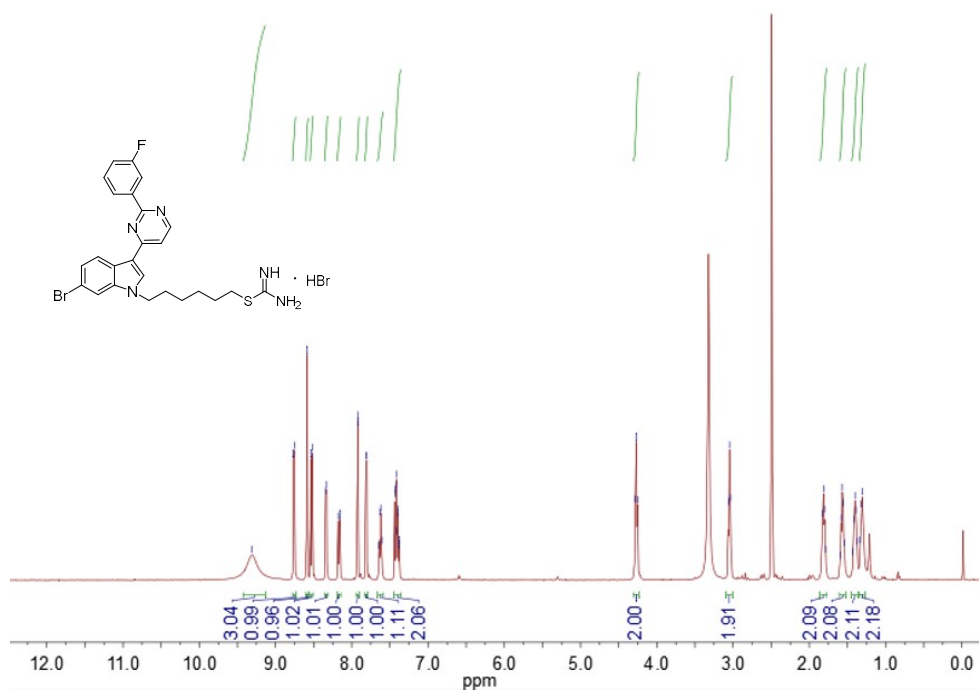

$^1\text{H}$  NMR Spectrum of **6e**

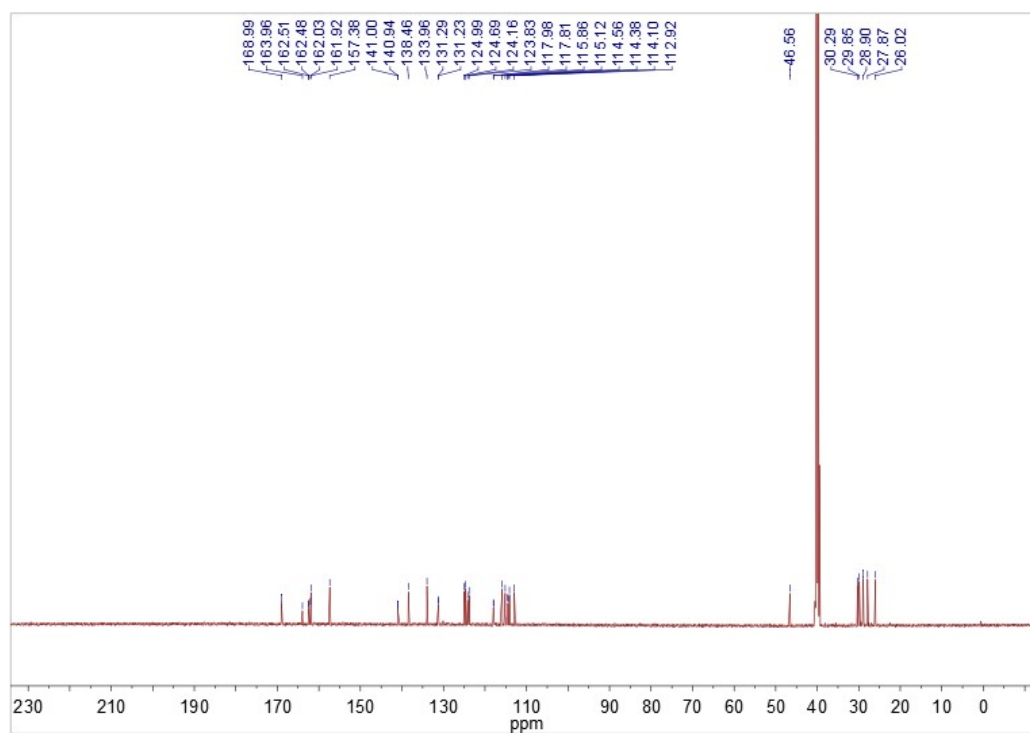

$^{13}\text{C}$  NMR Spectrum of **6e**

20210707-6E\_210705141924 #51 RT: 0.41 AV: 1 NL: 1.01E8  
T: FTMS + c ESI Full ms [150.00-2000.00]

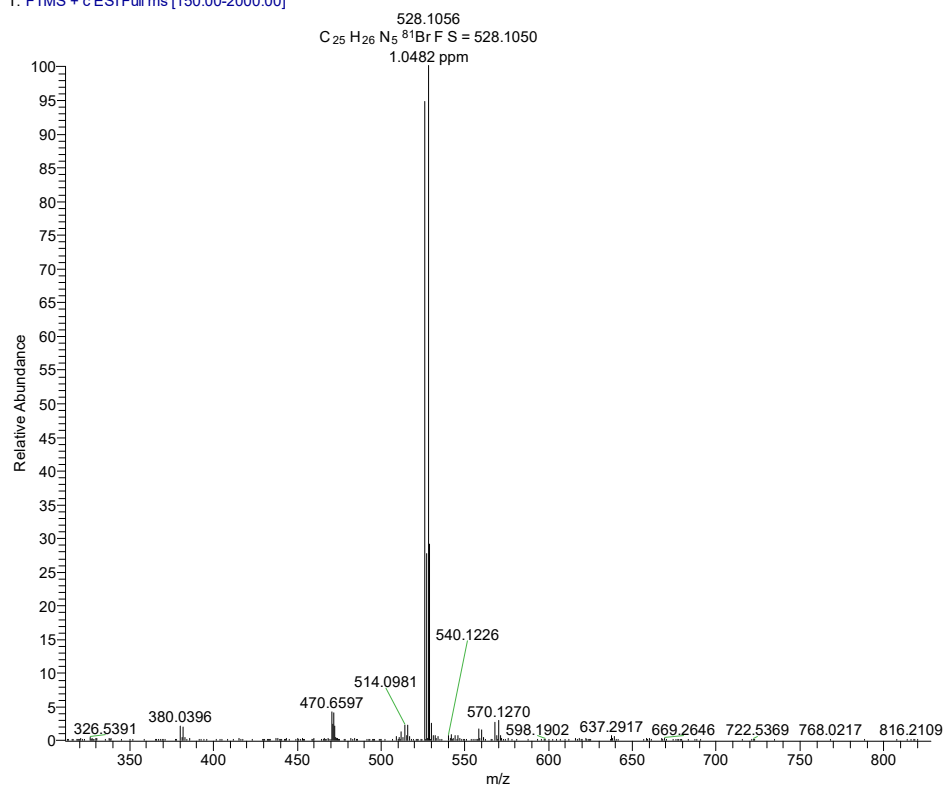

HRMS spectrum of **6e**

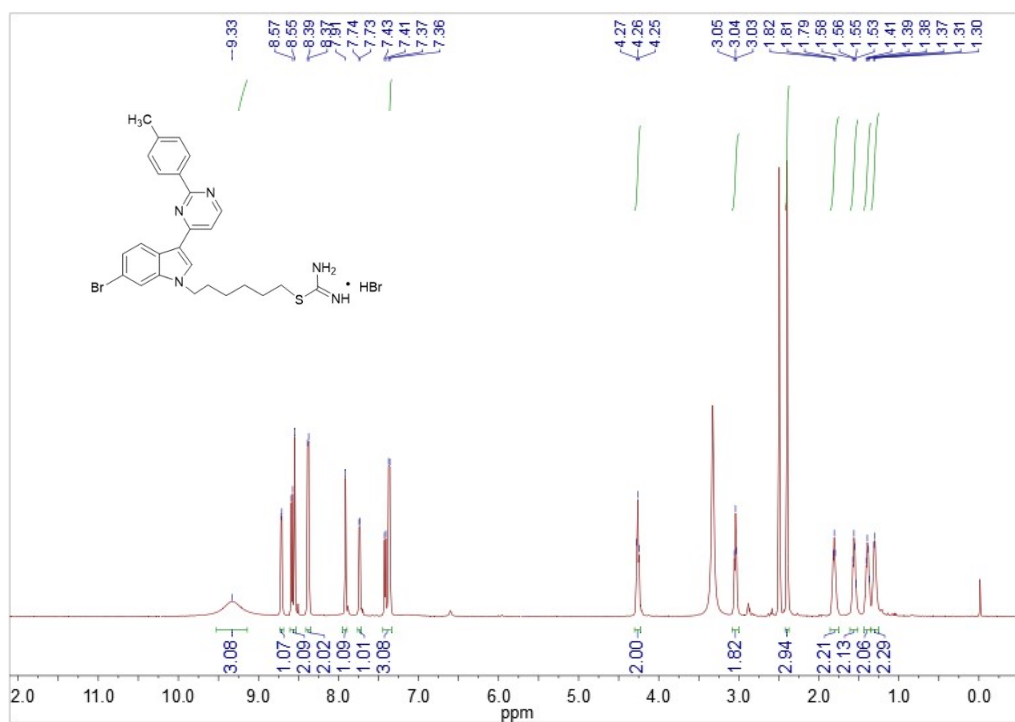

<sup>1</sup>H NMR Spectrum of **6f**

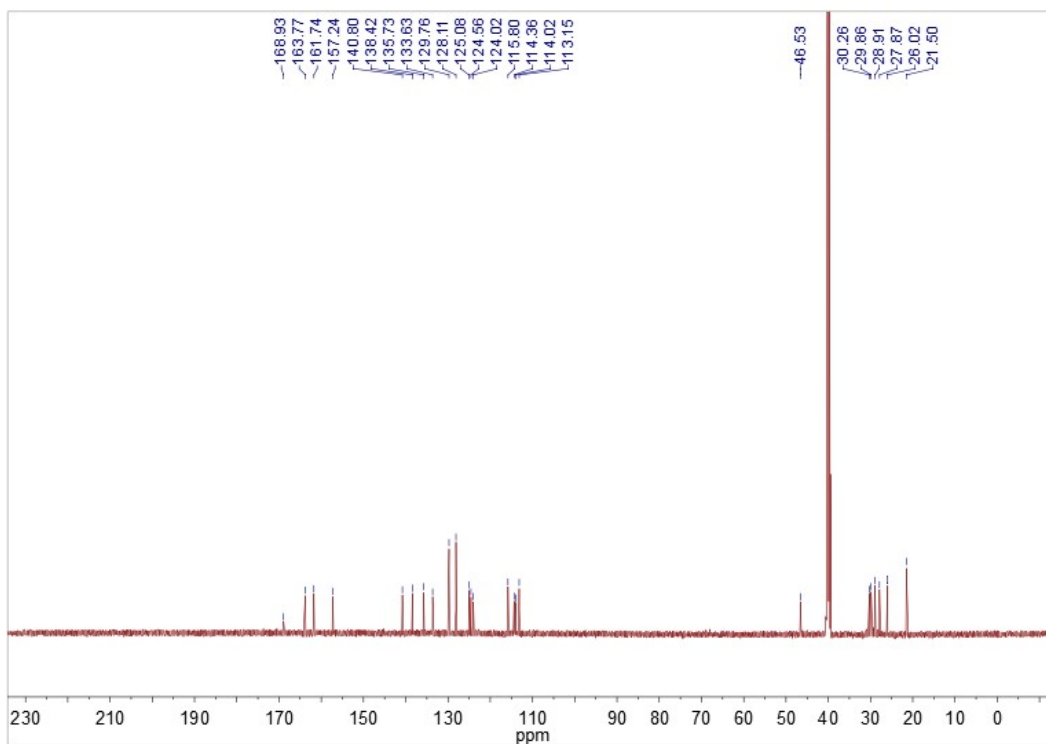

<sup>13</sup>C NMR Spectrum of **6f**

20210707-6F\_210705141924 #45 RT: 0.36 AV: 1 NL: 3.75E7  
T: FTMS + c ESI Full ms [150.00-2000.00]

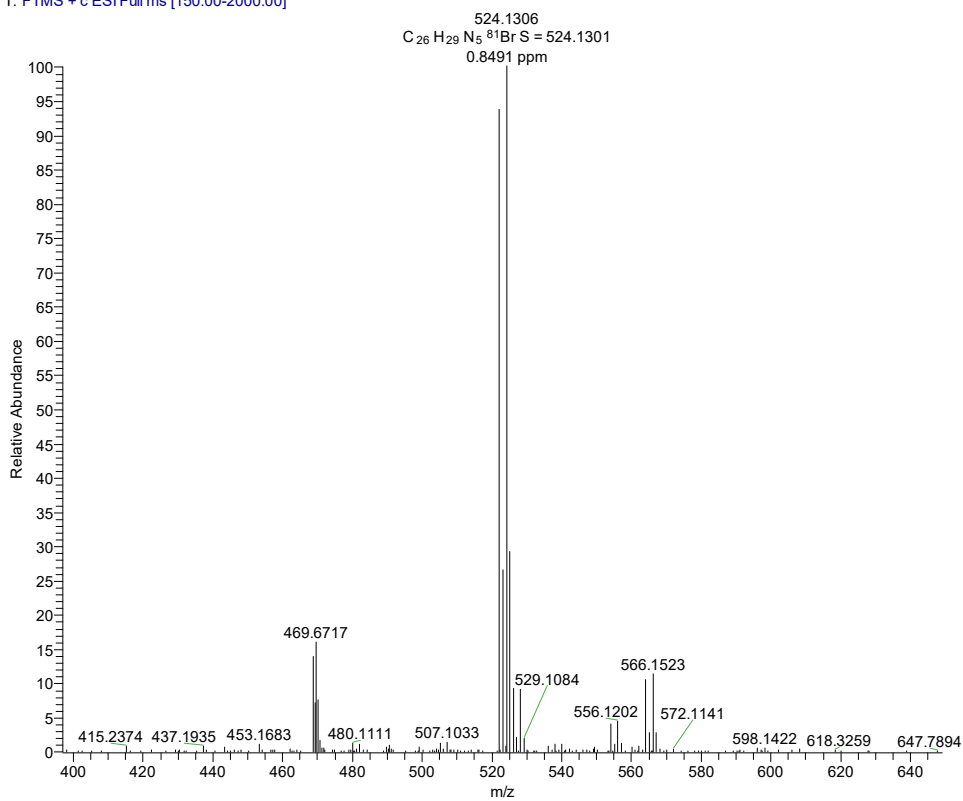

HRMS spectrum of **6f**

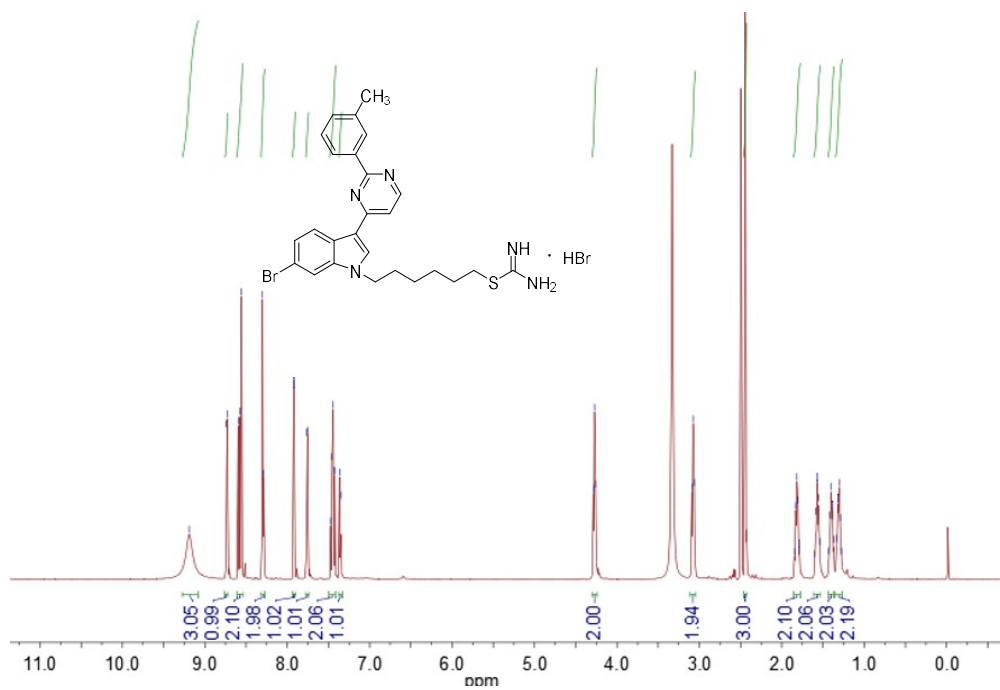

<sup>1</sup>H NMR Spectrum of **6g**

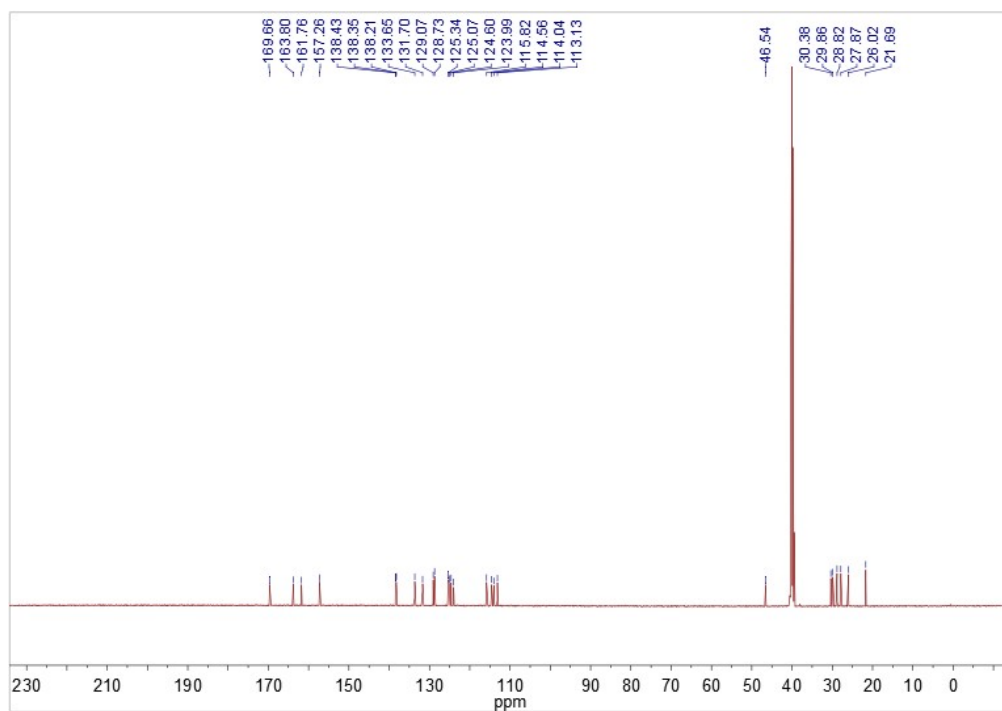

<sup>13</sup>C NMR Spectrum of **6g**

20210707-6G\_210705141924 #3 RT: 0.02 AV: 1 NL: 6.60E6  
T: FTMS + c ESI Full ms [150.00-2000.00]

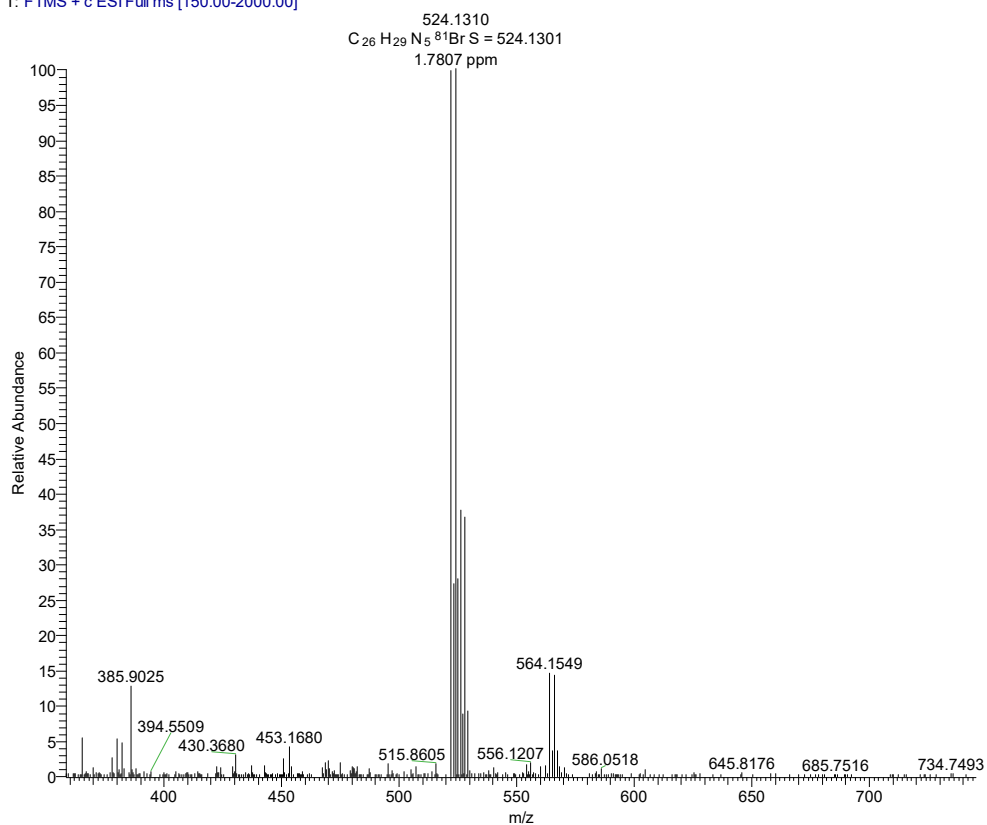

HRMS spectrum of **6g**

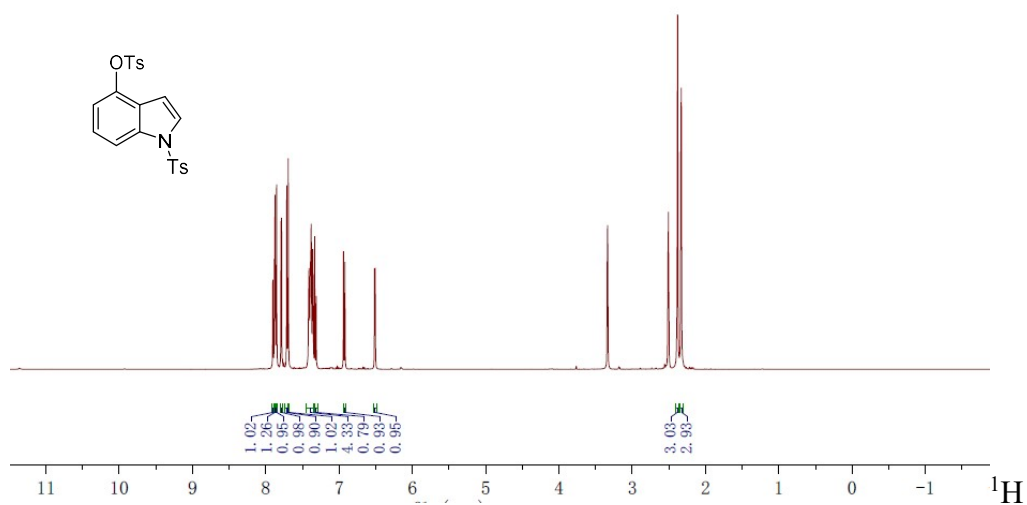

NMR Spectrum of **13**



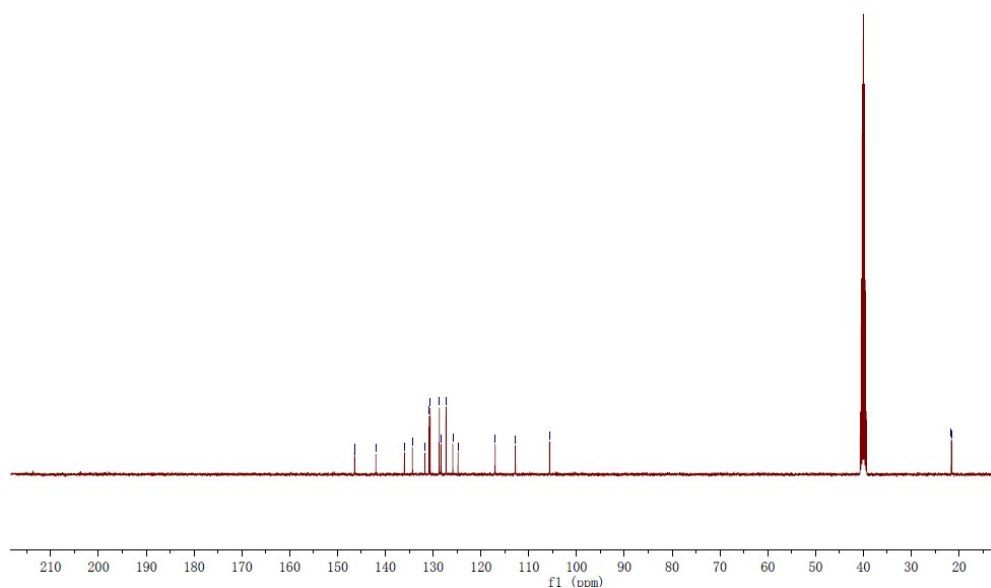

20210707-13\_210707090105#17 RT: 0.13 AV: 1 SB: 6 0.00-0.04 NL: 1.07E6  
T: FTMS + c ESI Full ms [150.00-2000.00]

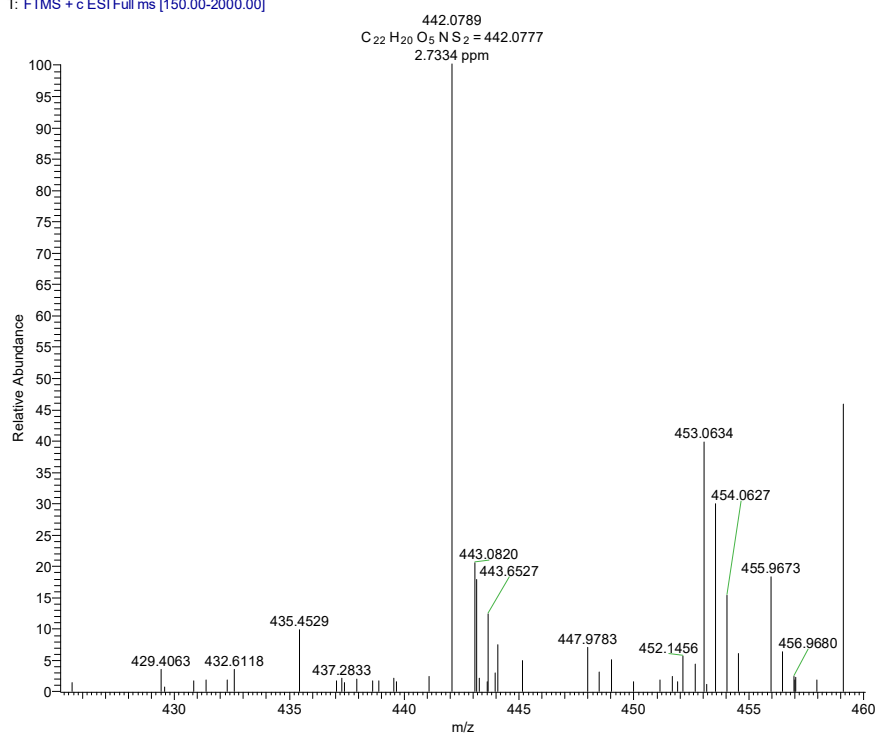

HRMS spectrum of **13**

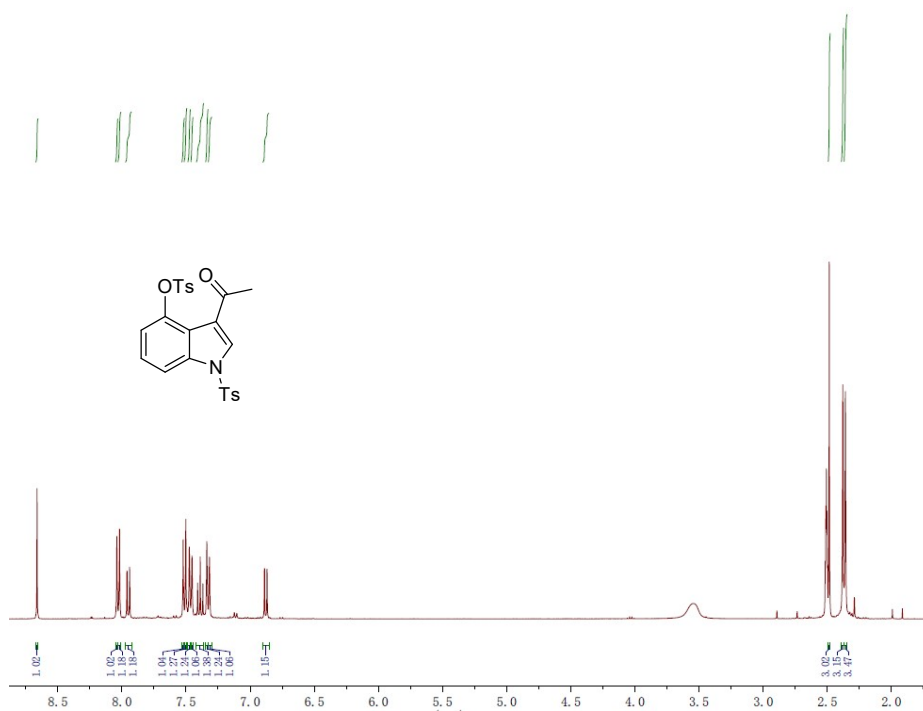

<sup>1</sup>H NMR Spectrum of **14**

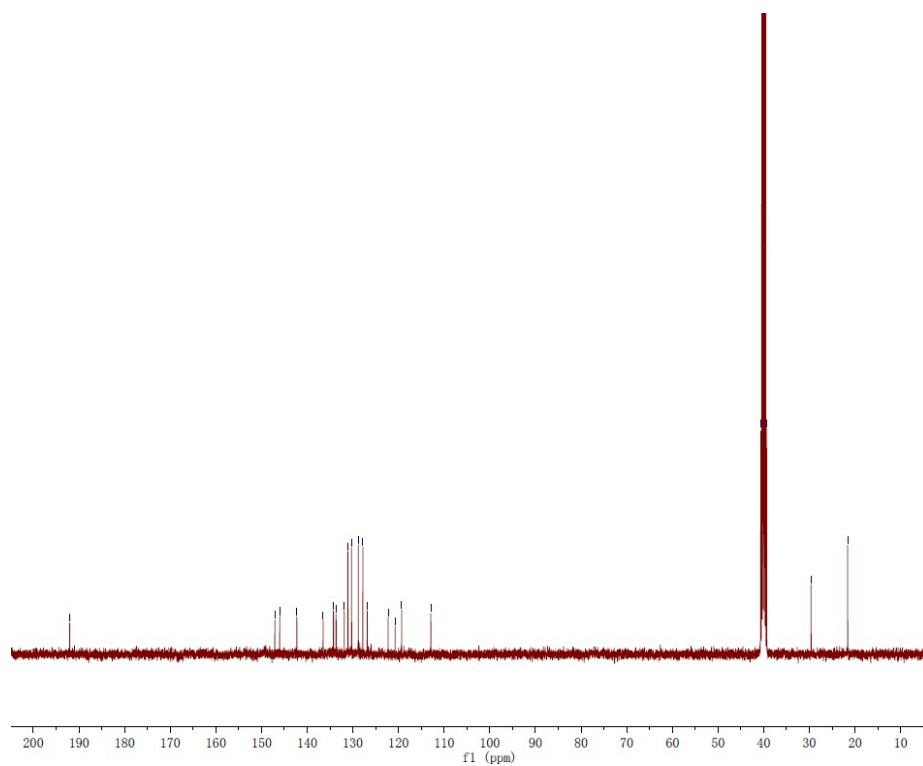

<sup>13</sup>C NMR Spectrum of **14**

20210707-14\_210707090105 #25 RT: 0.20 AV: 1 NL: 1.08E6  
T: FTMS + c ESI Full ms [150.00-2000.00]

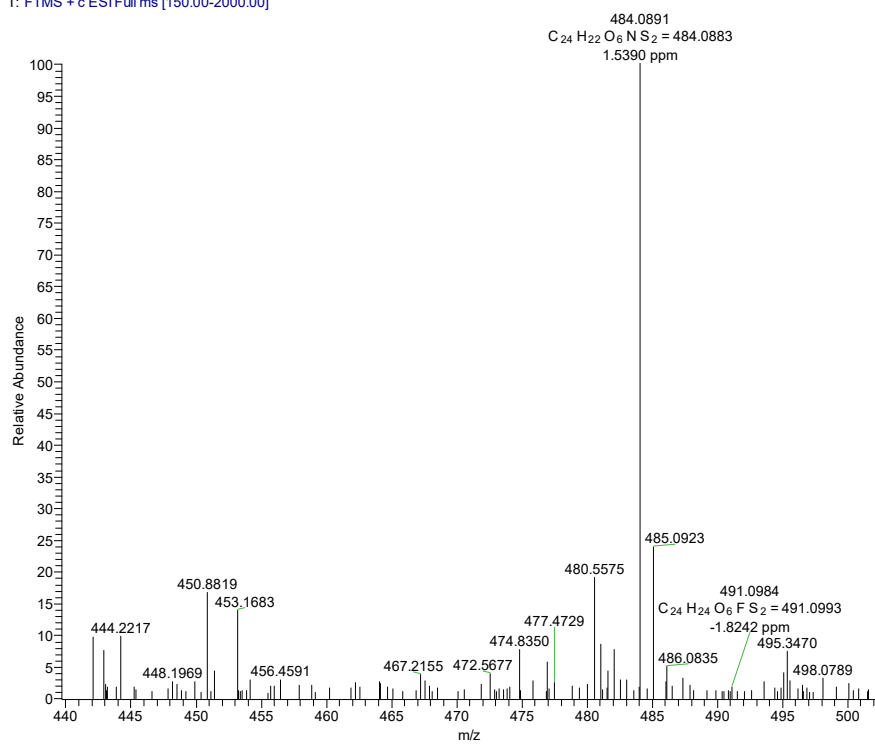

HRMS spectrum of **14**

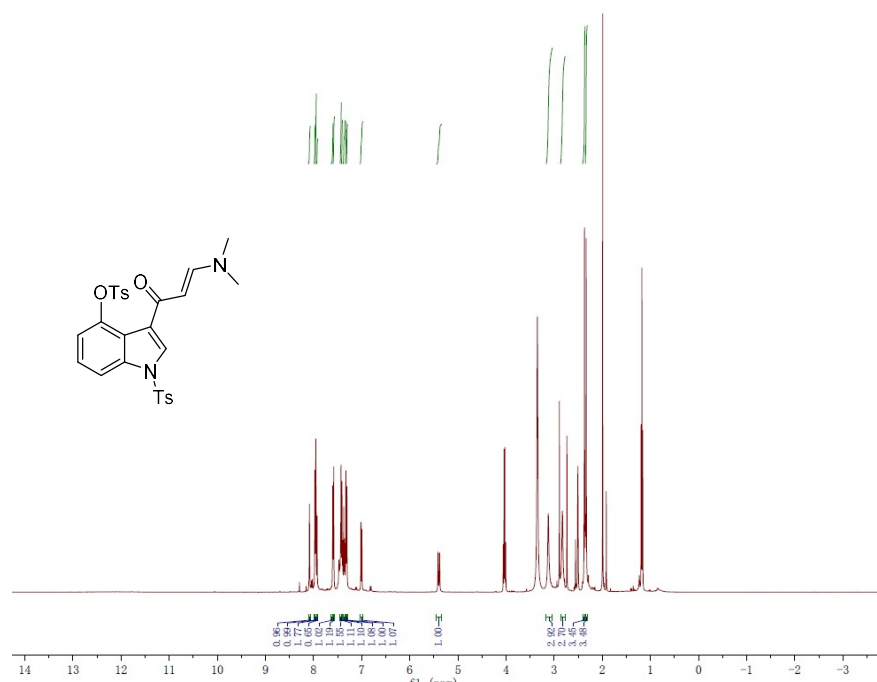

<sup>1</sup>H NMR Spectrum of **15**

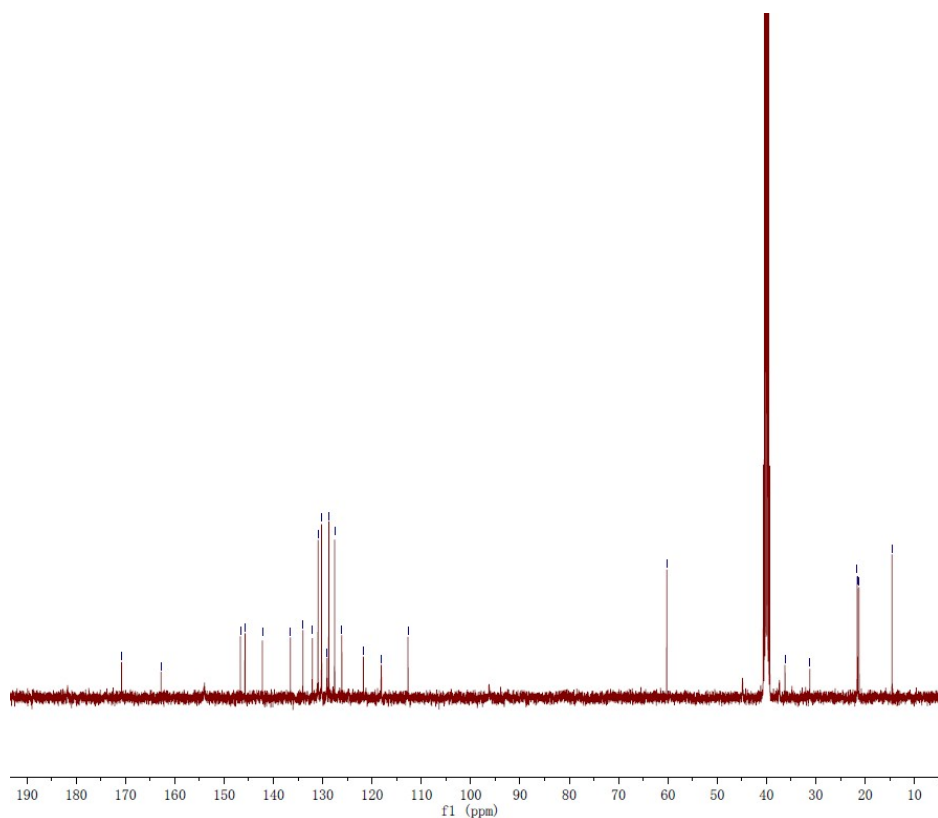

20210707-15\_210707090105 #66-67 RT: 0.52-0.53 AV: 2 NL: 2.07E8  
T: FTMS + c ESI Full ms [150.00-2000.00]

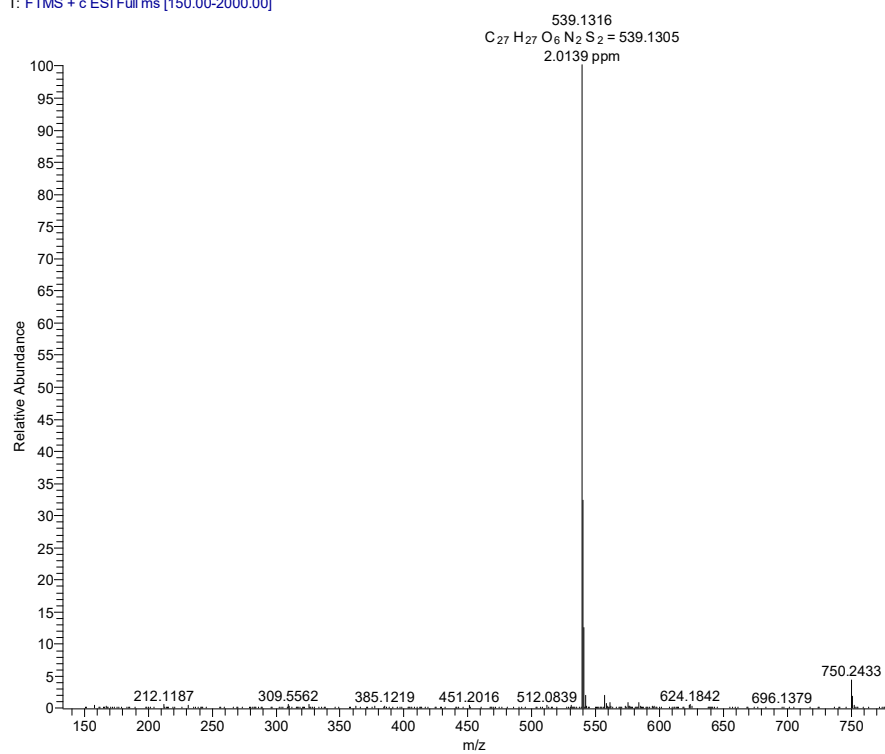

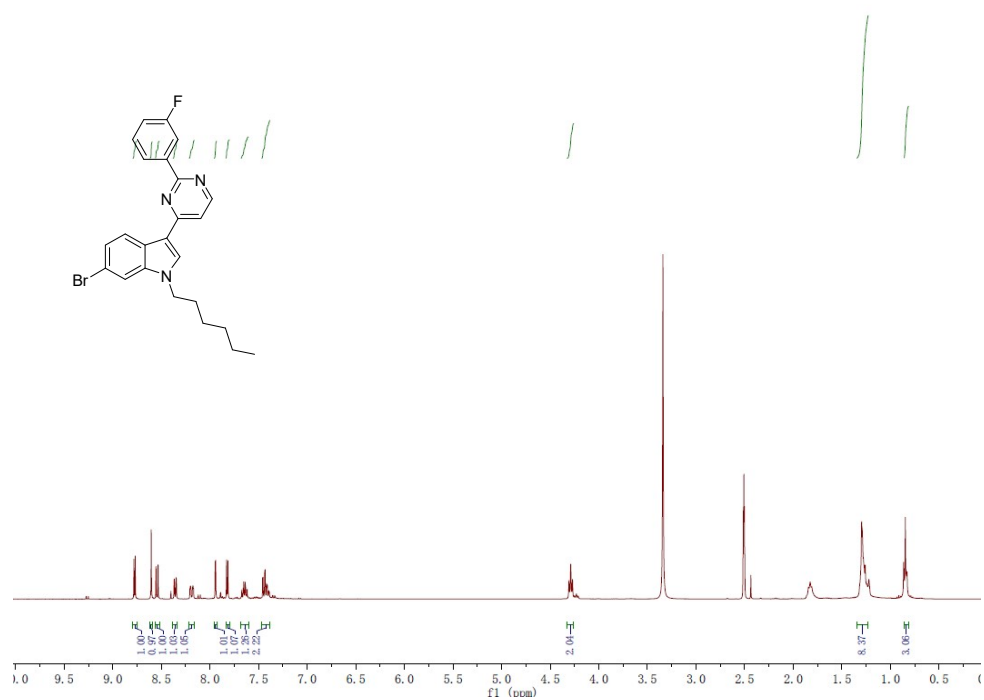

<sup>1</sup>H NMR Spectrum of **6e-1**

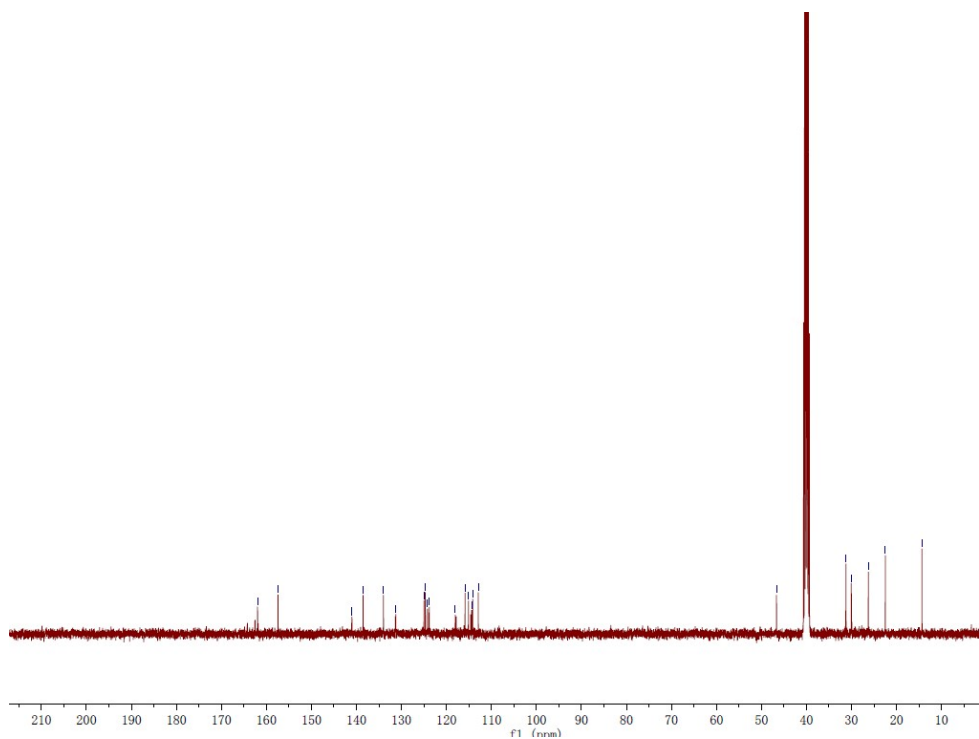

<sup>13</sup>C NMR Spectrum of **6e-1**

20210707-6E-1\_210707090105 #60 RT: 0.49 AV: 1 SB: 21 0.03-0.20 NL: 1.97E6  
T: FTMS + c ESI Full ms [150.00-2000.00]

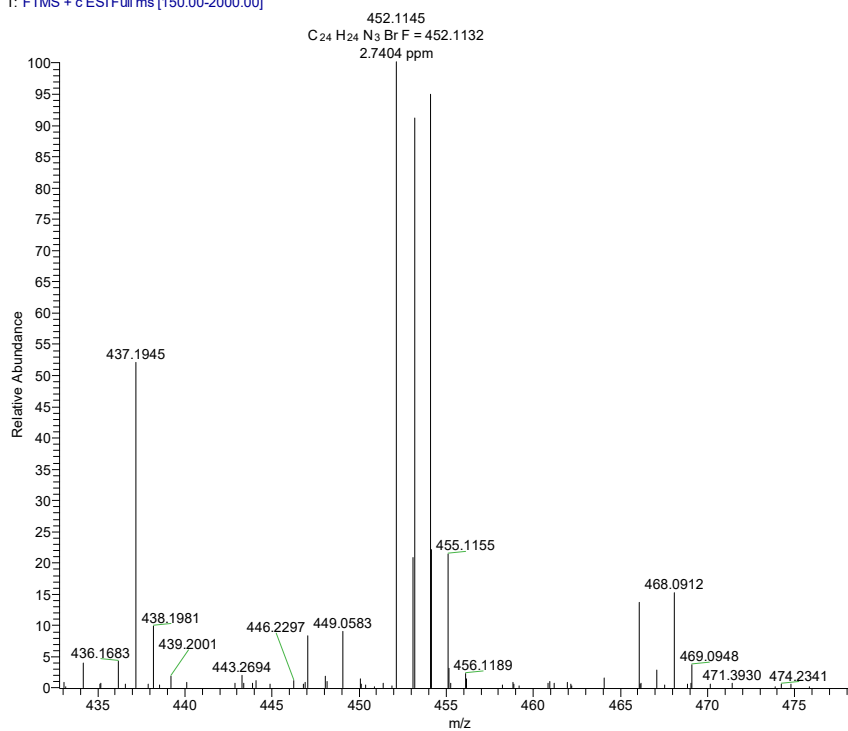

HRMS spectrum of 6e-1

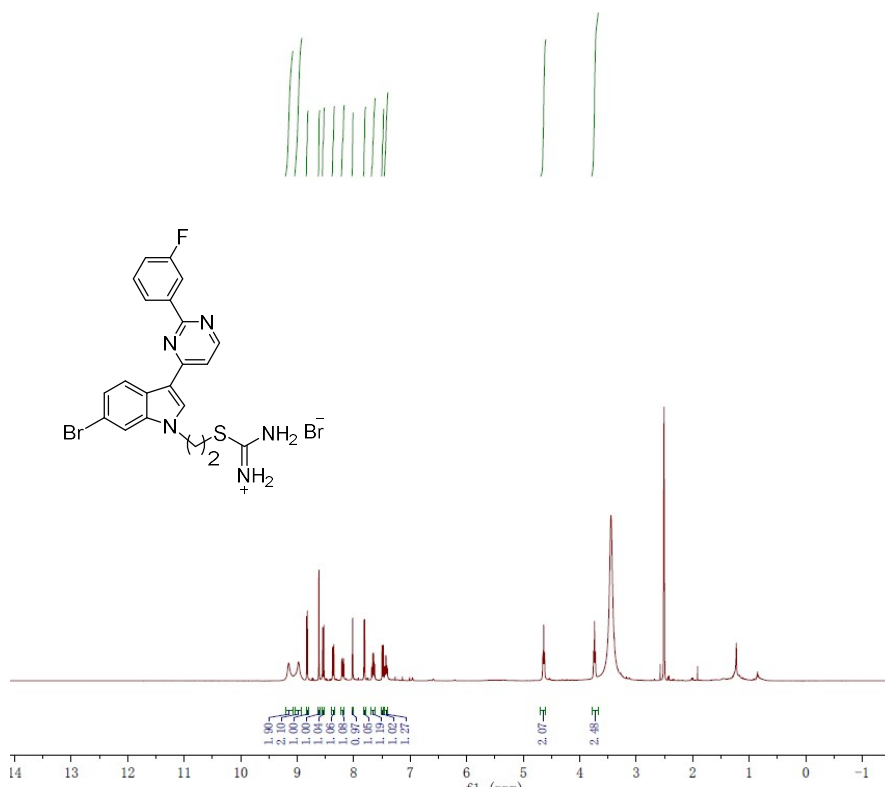

<sup>1</sup>H NMR Spectrum of 6e-2

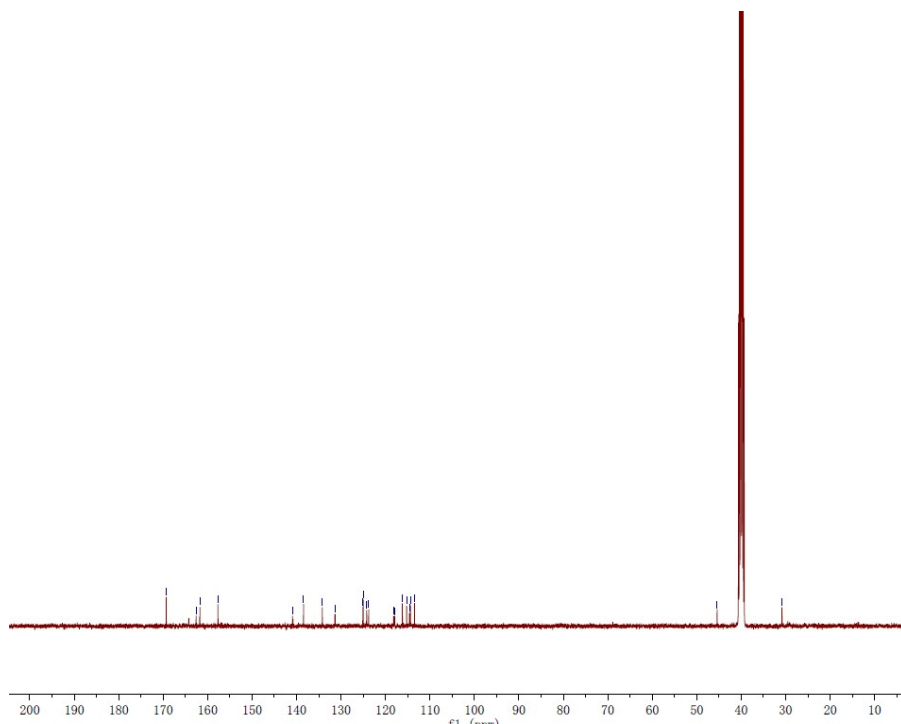

<sup>13</sup>C NMR Spectrum of **6e-2**

20210707-6E-2\_210707090105 #73 RT: 0.59 AV: 1 NL: 1.65E8  
T: FTMS + c ESI Full ms [150.00-2000.00]

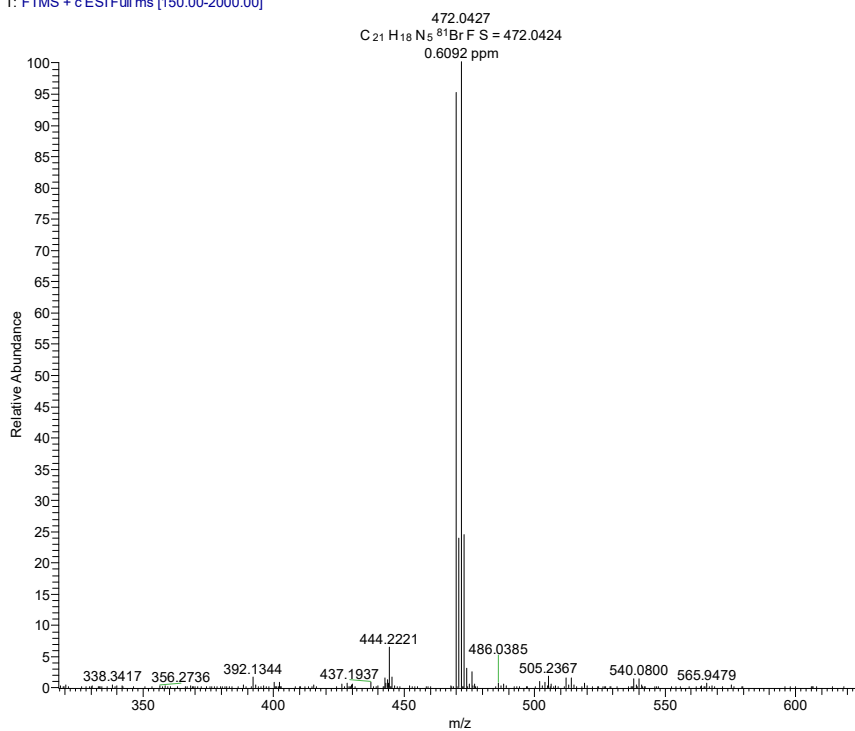

HRMS spectrum of **6e-2**

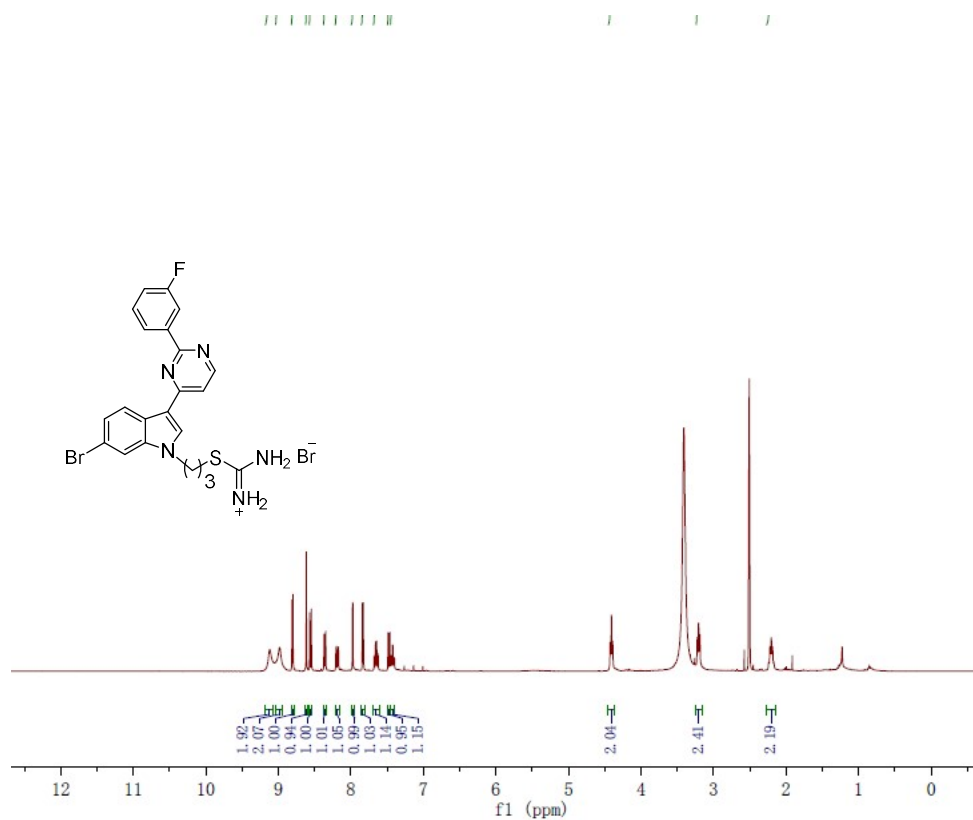

<sup>1</sup>H NMR Spectrum of **6e-3**

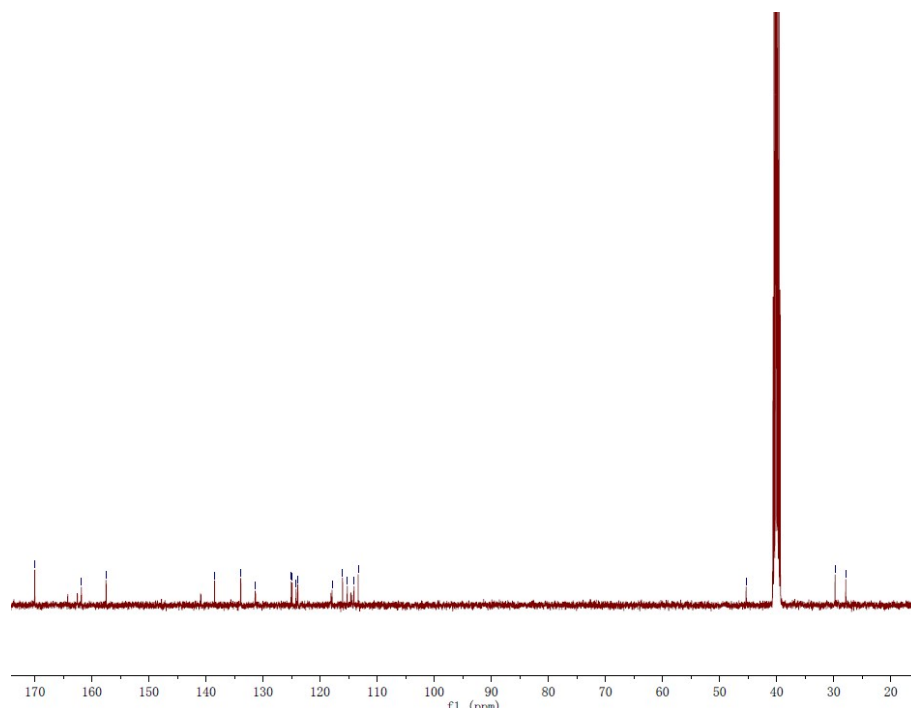

<sup>13</sup>C NMR Spectrum of **6e-3**



20210707-6E-3\_210707090105 #46 RT: 0.37 AV: 1 NL: 1.69E8  
T: FTMS + c ESI Full ms [150.00-2000.00]

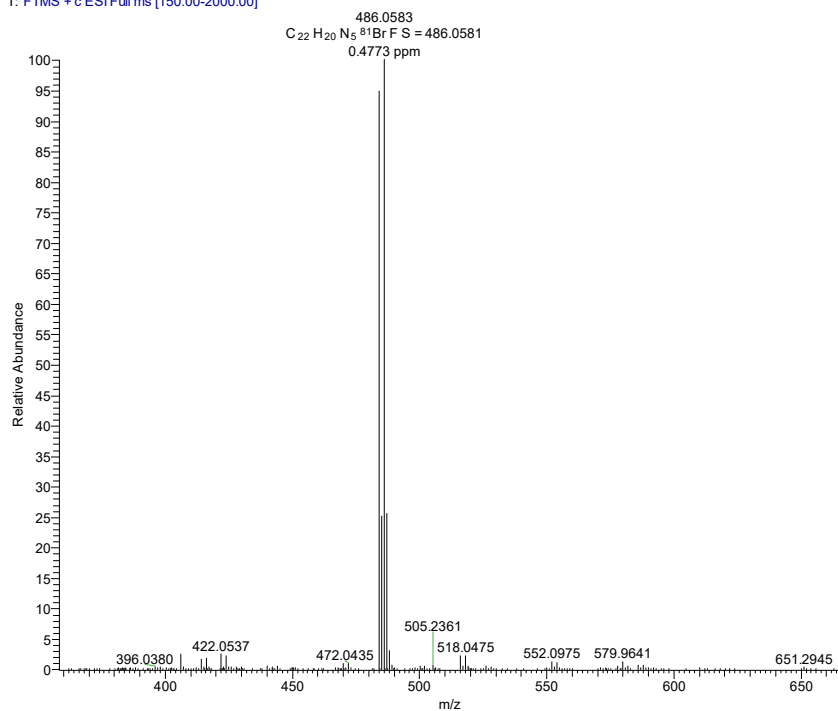

HRMS spectrum of **6e-3**

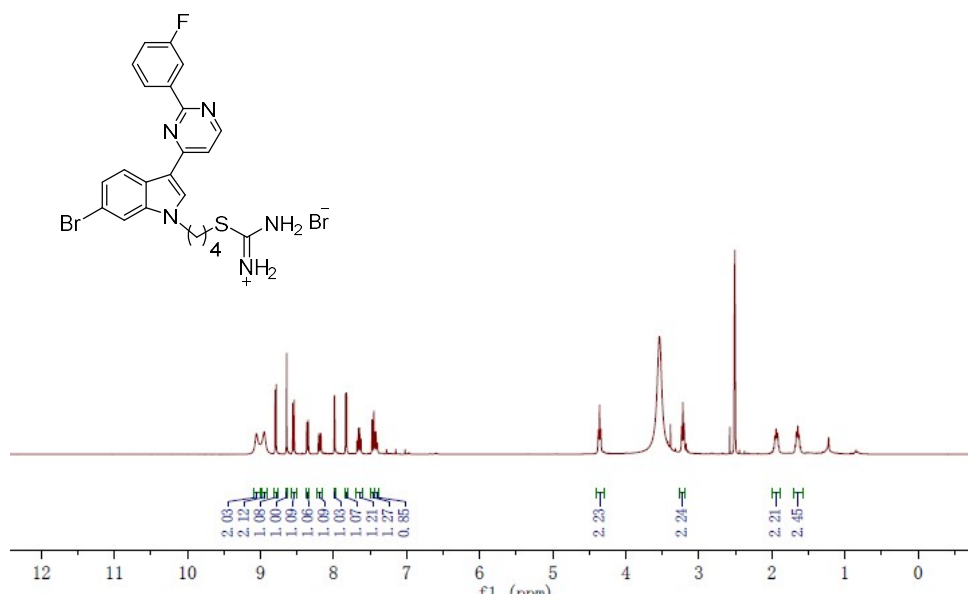

<sup>1</sup>H NMR Spectrum of **6e-4**

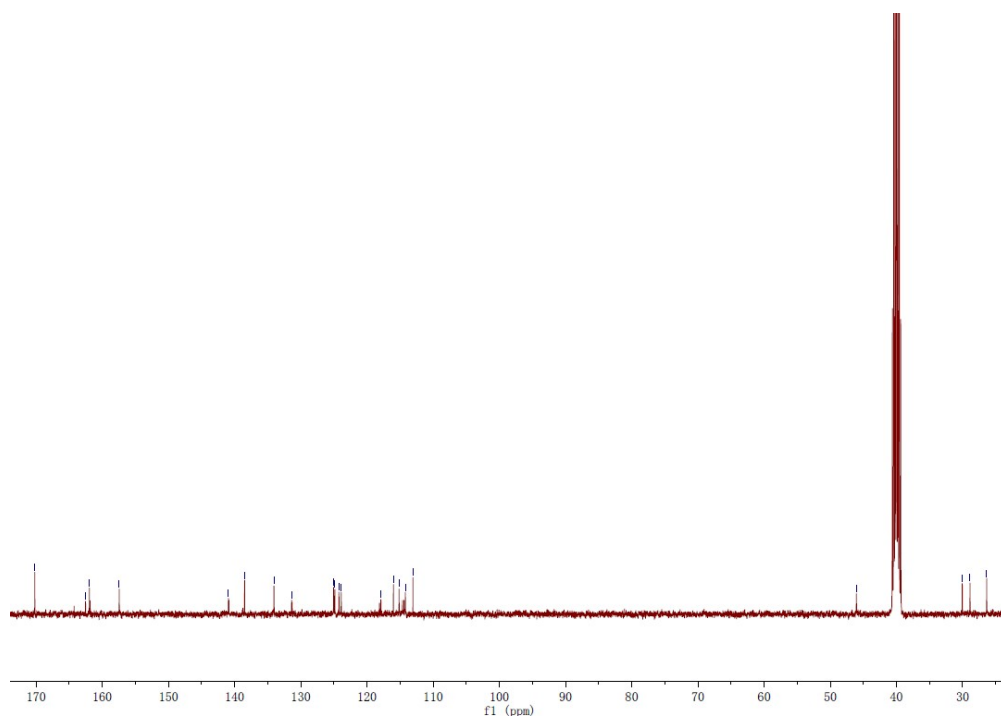

20210707-6E-4 210707090105 #58 RT: 0.46 AV: 1 NL: 1.60E8  
T: FTMS + c ESI Full ms [150.00-2000.00]

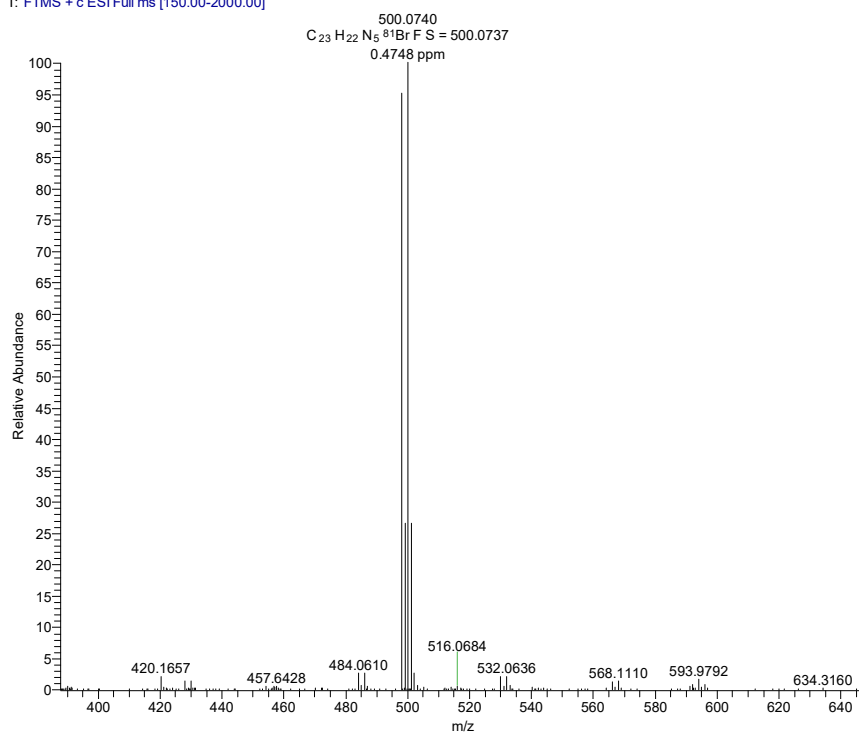

HRMS spectrum of **6e-4**



20210707-6E-5\_210707090105 #36 RT: 0.29 AV: 1 NL: 1.40E8  
T: FTMS + c ESI Full ms [150.00-2000.00]

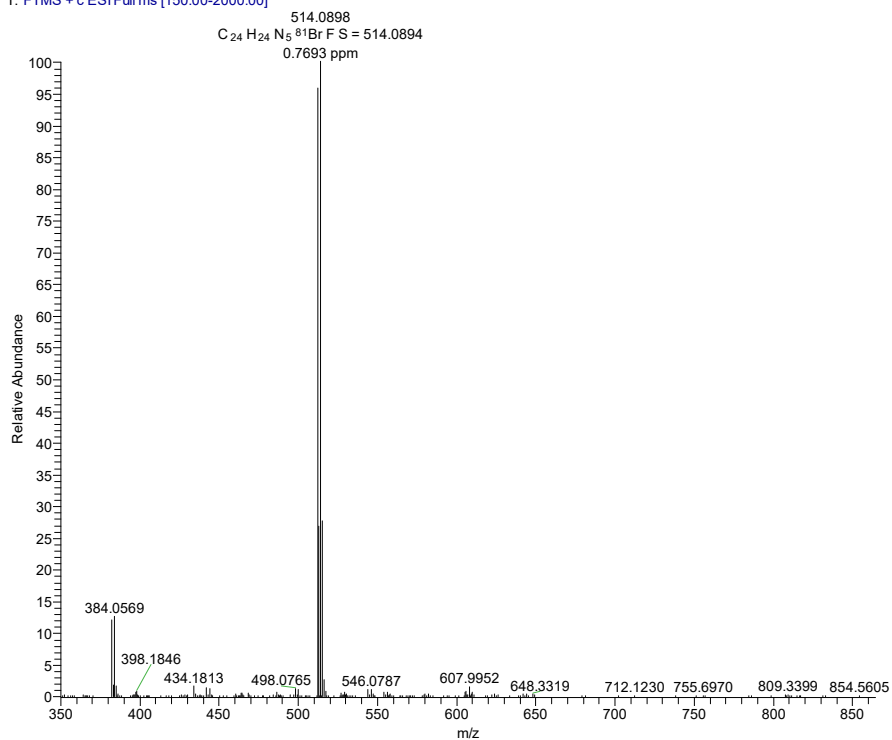

HRMS spectrum of 6e-5

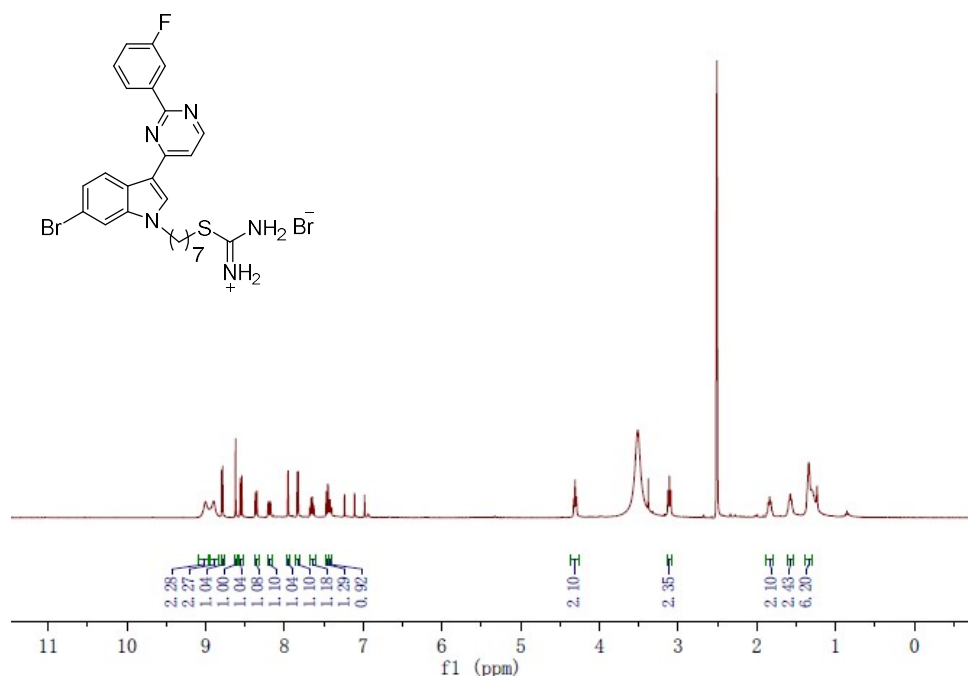

<sup>1</sup>H NMR Spectrum of 6e-6

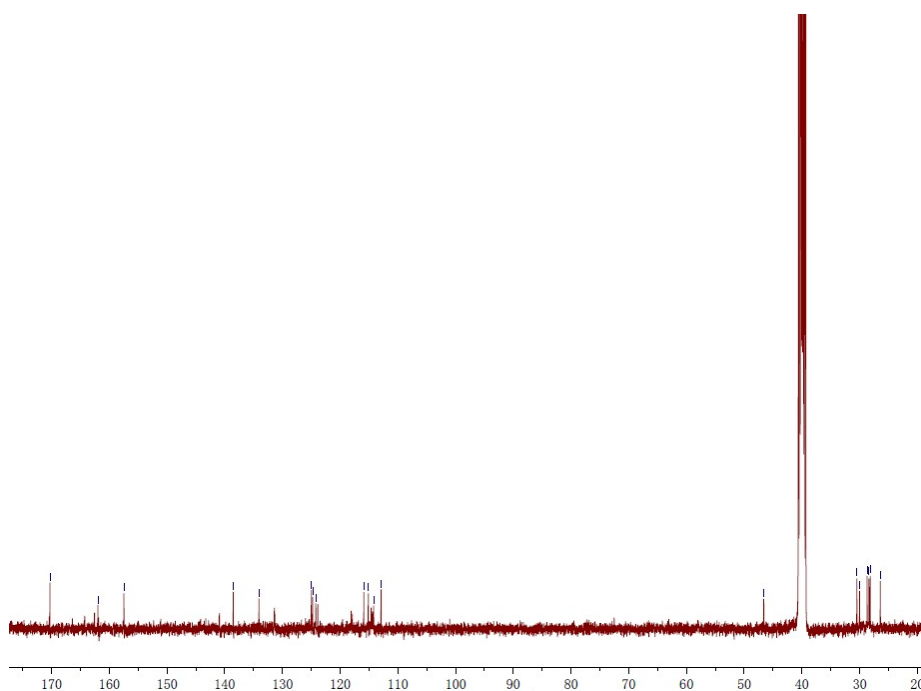

$^{13}\text{C}$  NMR Spectrum of **6e-6**

20210707-6E-6\_210707090105 #46 RT: 0.36 AV: 1 SB: 6 0.00-0.04 NL: 2.44E8  
T: FTMS + c ESI Full ms [150.00-2000.00]

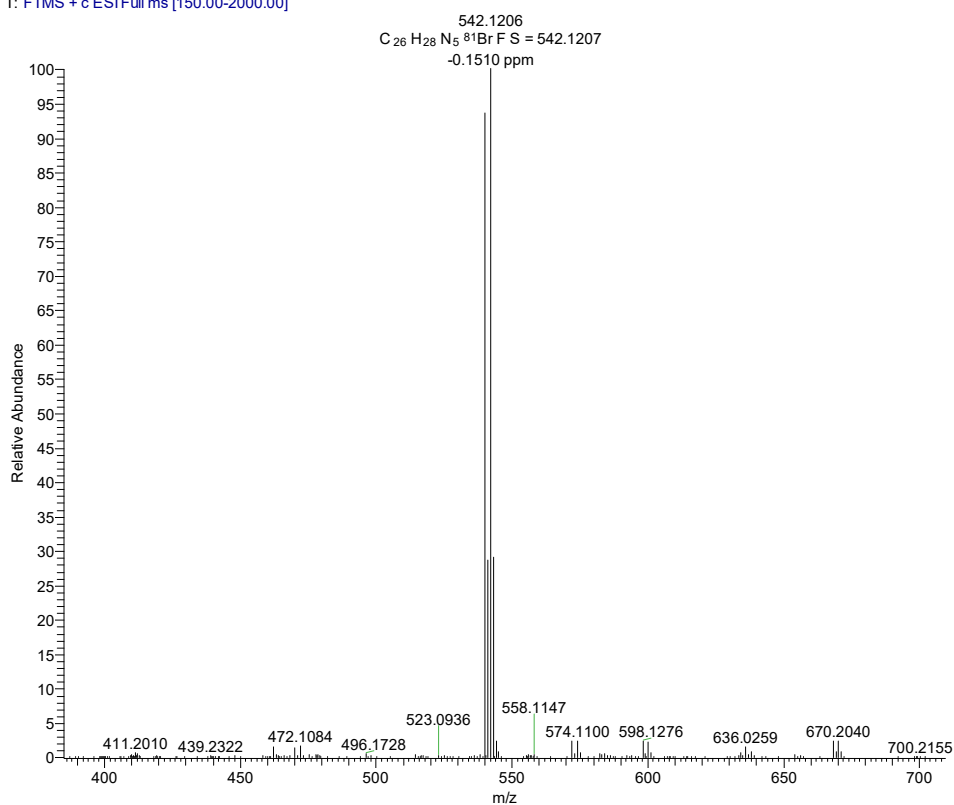

HRMS spectrum of **6e-6**
